# Supplementary material for: Preclinical models of maternal asthma and progeny outcomes: a scoping review
Source: PubMed Central journal article supplement — Eur Respir Rev. 2024 Feb 28;33(171):230174. doi: 10.1183/16000617.0174-2023 (PMC10900068; doi:10.1183/16000617.0174-2023), 2024-02-28
Supplement: ERR-0174-2023.SUPPLEMENT.pdf [file ERR-0174-2023.SUPPLEMENT.pdf]

## Supplementary information

Preclinical models of maternal asthma and progeny outcomes: a scoping review

Joshua L Robinson<sup>1-3</sup>, Kathryn L Gatford<sup>1,4</sup>, Danielle N Bailey<sup>1</sup>, Andrea J Roff<sup>1,4</sup>, Vicki L Clifton<sup>5</sup>, Janna L Morrison<sup>3</sup>, Michael J Stark<sup>1, 2, 6</sup>

<sup>1</sup>Robinson Research Institute, University of Adelaide, Adelaide, Australia

<sup>2</sup>Adelaide Medical School, University of Adelaide, Adelaide, Australia

<sup>3</sup>Early Origins of Adult Health Research Group, Health and Biomedical Innovation, UniSA: Clinical and Health Sciences, University of South Australia, Adelaide, Australia

<sup>4</sup>School of Biomedicine, University of Adelaide, Adelaide, Australia

<sup>5</sup>Mater Research Institute, University of Queensland, Brisbane, Australia

<sup>6</sup>Department of Neonatal Medicine, Women's & Children's Hospital, Adelaide, Australia

## List of supplementary information

|                                                                  |    |
|------------------------------------------------------------------|----|
| Table S1 – Databases and search strategies .....                 | 3  |
| Table S2 – ARRIVE 2.0 Guidelines .....                           | 7  |
| Table S3 - Description of included studies .....                 | 10 |
| Table S4 – Maternal outcomes .....                               | 19 |
| Table S5 – Placental outcomes .....                              | 25 |
| Table S6 – Pregnancy and Fetal outcomes .....                    | 28 |
| Table S7 – Postnatal offspring outcomes.....                     | 31 |
| Table S8 - Quality assessment – ARRIVE 2.0 Essential 10 .....    | 54 |
| Table S9 - Quality assessment – ARRIVE 2.0 Recommended Set ..... | 56 |
| References .....                                                 | 58 |

Table S1 – Databases and search strategies

|                                                                          |                                                                                                                                                                                                                                                                                                                                                                                                                                                                                                                                                                                                                                                                                                                                                                                                                                                                                                                                                                                                                                                                                                                                                                                                                                                                                                                                                                                                                                                                                                                                                                                                                                                                                                                                                                                                                                                                                                                                                                                                                                                                                                                                                                                                                                                                                                                                                                                                                                                                                                                                                                                                                                                                                                                                                                                                                                                                                               |
|--------------------------------------------------------------------------|-----------------------------------------------------------------------------------------------------------------------------------------------------------------------------------------------------------------------------------------------------------------------------------------------------------------------------------------------------------------------------------------------------------------------------------------------------------------------------------------------------------------------------------------------------------------------------------------------------------------------------------------------------------------------------------------------------------------------------------------------------------------------------------------------------------------------------------------------------------------------------------------------------------------------------------------------------------------------------------------------------------------------------------------------------------------------------------------------------------------------------------------------------------------------------------------------------------------------------------------------------------------------------------------------------------------------------------------------------------------------------------------------------------------------------------------------------------------------------------------------------------------------------------------------------------------------------------------------------------------------------------------------------------------------------------------------------------------------------------------------------------------------------------------------------------------------------------------------------------------------------------------------------------------------------------------------------------------------------------------------------------------------------------------------------------------------------------------------------------------------------------------------------------------------------------------------------------------------------------------------------------------------------------------------------------------------------------------------------------------------------------------------------------------------------------------------------------------------------------------------------------------------------------------------------------------------------------------------------------------------------------------------------------------------------------------------------------------------------------------------------------------------------------------------------------------------------------------------------------------------------------------------|
| <p>MEDLINE (PubMed) – last searched<br/>10<sup>th</sup> January 2023</p> | <p>(Asthma [mh] OR Asthma [tiab] OR “Respiratory hypersensitivity” [tiab] OR Wheez* [tiab])<br/>AND<br/>(Pregnancy [mh] OR Maternal [tiab] OR Gestat* [tiab] OR Pregnan* [tiab])<br/>AND<br/>((“animal experimentation”[MeSH Terms] OR “models, animal”[MeSH Terms] OR “Animals”[Mesh:noexp] OR “animal population groups”[MeSH Terms] OR “chordata”[MeSH Terms:noexp] OR “vertebrates”[MeSH Terms:noexp] OR “mammals”[MeSH Terms:noexp] OR “primates”[MeSH Terms:noexp] OR “artiodactyla”[MeSH Terms] OR “carnivora”[MeSH Terms] OR “cetacea”[MeSH Terms] OR “chiroptera”[MeSH Terms] OR “elephants”[MeSH Terms] OR “hyraxes”[MeSH Terms] OR “lagomorpha”[MeSH Terms] OR “marsupialia”[MeSH Terms] OR “monotremata”[MeSH Terms] OR “perissodactyla”[MeSH Terms] OR “rodentia”[MeSH Terms] OR “scandentia”[MeSH Terms] OR “sirenia”[MeSH Terms] OR “xenarthra”[MeSH Terms] OR “haplorhini”[MeSH Terms:noexp] OR “strepsirhini”[MeSH Terms] OR “platyrrhini”[MeSH Terms] OR “tarsii”[MeSH Terms] OR “catarrhini”[MeSH Terms:noexp] OR “cercopithecidae”[MeSH Terms] OR “hylobatidae”[MeSH Terms] OR “hominidae”[MeSH Terms:noexp] OR “gorilla gorilla”[MeSH Terms] OR “pan paniscus”[MeSH Terms] OR “pan troglodytes”[MeSH Terms] OR “pongo pygmaeus”[MeSH Terms])<br/>OR<br/>((animals[tiab] OR animal[tiab] OR mice[Tiab] OR mus[Tiab] OR mouse[Tiab] OR murine[Tiab] OR woodmouse[tiab] OR rats[Tiab] OR rat[Tiab] OR murinae[Tiab] OR muridae[Tiab] OR cottonrat[tiab] OR cottonrats[tiab] OR hamster[tiab] OR hamsters[tiab] OR cricetinae[tiab] OR rodentia[Tiab] OR rodent[Tiab] OR rodents[Tiab] OR pigs[Tiab] OR pig[Tiab] OR swine[tiab] OR swines[tiab] OR piglets[tiab] OR piglet[tiab] OR boar[tiab] OR boars[tiab] OR “sus scrofa”[tiab] OR ferrets[tiab] OR ferret[tiab] OR polecat[tiab] OR polecats[tiab] OR “mustela putorius”[tiab] OR “guinea pigs”[Tiab] OR “guinea pig”[Tiab] OR cavia[Tiab] OR callithrix[Tiab] OR marmoset[Tiab] OR marmosets[Tiab] OR cebuella[Tiab] OR hapale[Tiab] OR octodon[Tiab] OR chinchilla[Tiab] OR chinchillas[Tiab] OR gerbillinae[Tiab] OR gerbil[Tiab] OR gerbils[Tiab] OR jird[Tiab] OR jirds[Tiab] OR merione[Tiab] OR meriones[Tiab] OR rabbits[Tiab] OR rabbit[Tiab] OR hares[Tiab] OR hare[Tiab] OR cats[Tiab] OR cat[Tiab] OR carus[Tiab] OR felis[Tiab] OR dogs[Tiab] OR dog[Tiab] OR canine[Tiab] OR canines[Tiab] OR canis[Tiab] OR sheep[Tiab] OR sheeps[Tiab] OR mouflon[Tiab] OR mouflons[Tiab] OR ovis[Tiab] OR goats[Tiab] OR goat[Tiab] OR capra[Tiab] OR capras[Tiab] OR rupicapra[Tiab] OR rupicapras[Tiab] OR chamois[Tiab] OR haplorhini[Tiab] OR monkey[Tiab] OR monkeys[Tiab] OR anthropoidea[Tiab] OR anthropoids[Tiab] OR saguinus[Tiab] OR tamarin[Tiab] OR tamarins[Tiab] OR leontopithecus[Tiab] OR hominidae[Tiab] OR ape[Tiab] OR apes[Tiab] OR “pan paniscus”[Tiab] OR bonobo[Tiab] OR bonobos[Tiab] OR</p> |
|--------------------------------------------------------------------------|-----------------------------------------------------------------------------------------------------------------------------------------------------------------------------------------------------------------------------------------------------------------------------------------------------------------------------------------------------------------------------------------------------------------------------------------------------------------------------------------------------------------------------------------------------------------------------------------------------------------------------------------------------------------------------------------------------------------------------------------------------------------------------------------------------------------------------------------------------------------------------------------------------------------------------------------------------------------------------------------------------------------------------------------------------------------------------------------------------------------------------------------------------------------------------------------------------------------------------------------------------------------------------------------------------------------------------------------------------------------------------------------------------------------------------------------------------------------------------------------------------------------------------------------------------------------------------------------------------------------------------------------------------------------------------------------------------------------------------------------------------------------------------------------------------------------------------------------------------------------------------------------------------------------------------------------------------------------------------------------------------------------------------------------------------------------------------------------------------------------------------------------------------------------------------------------------------------------------------------------------------------------------------------------------------------------------------------------------------------------------------------------------------------------------------------------------------------------------------------------------------------------------------------------------------------------------------------------------------------------------------------------------------------------------------------------------------------------------------------------------------------------------------------------------------------------------------------------------------------------------------------------------|

|                                                                       |                                                                                                                                                                                                                                                                                                                                                                                                                                                                                                                                                                                                                                                                                                                                                                                                                                                                                                                                                                                                                                                                                                                                                                                                                                                                                                                                                                                                                                                                                                                                                                                                                                                                                                                                                                                                                                                                                                                                           |
|-----------------------------------------------------------------------|-------------------------------------------------------------------------------------------------------------------------------------------------------------------------------------------------------------------------------------------------------------------------------------------------------------------------------------------------------------------------------------------------------------------------------------------------------------------------------------------------------------------------------------------------------------------------------------------------------------------------------------------------------------------------------------------------------------------------------------------------------------------------------------------------------------------------------------------------------------------------------------------------------------------------------------------------------------------------------------------------------------------------------------------------------------------------------------------------------------------------------------------------------------------------------------------------------------------------------------------------------------------------------------------------------------------------------------------------------------------------------------------------------------------------------------------------------------------------------------------------------------------------------------------------------------------------------------------------------------------------------------------------------------------------------------------------------------------------------------------------------------------------------------------------------------------------------------------------------------------------------------------------------------------------------------------|
|                                                                       | <p>“pan troglodytes”[Tiab] OR gibbon[Tiab] OR gibbons[Tiab] OR siamang[Tiab] OR siamangs[Tiab] OR nomascus[Tiab] OR symphalangus[Tiab] OR chimpanzee[Tiab] OR chimpanzees[Tiab] OR prosimian[Tiab] OR prosimians[Tiab] OR “bush baby”[Tiab] OR bush babies[Tiab] OR galagos[Tiab] OR galago[Tiab] OR pongidae[Tiab] OR gorilla[Tiab] OR gorillas[Tiab] OR “pongo pygmaeus”[Tiab] OR orangutan[Tiab] OR orangutans[Tiab] OR lemur[Tiab] OR lemurs[Tiab] OR lemuridae[Tiab] OR horse[Tiab] OR horses[Tiab] OR equus[Tiab] OR cow[Tiab] OR calf[Tiab] OR bull[Tiab] OR sciuridae[Tiab] OR squirrel[Tiab] OR squirrels[Tiab] OR chipmunk[Tiab] OR chipmunks[Tiab] OR suslik[Tiab] OR susliks[Tiab] OR vole[Tiab] OR voles[Tiab] OR lemming[Tiab] OR lemmings[Tiab] OR muskrat[Tiab] OR muskrats[Tiab] OR lemmus[Tiab] OR otter[Tiab] OR otters[Tiab] OR marten[Tiab] OR martens[Tiab] OR martes[Tiab] OR weasel[Tiab] OR badger[Tiab] OR badgers[Tiab] OR ermine[Tiab] OR mink[Tiab] OR minks[Tiab] OR sable[Tiab] OR sables[Tiab] OR gulo[Tiab] OR gulos[Tiab] OR wolverine[Tiab] OR wolverines[Tiab] OR mustela[Tiab] OR llama[Tiab] OR llamas[Tiab] OR alpaca[Tiab] OR alpacas[Tiab] OR camelid[Tiab] OR camelids[Tiab] OR guanaco[Tiab] OR guanacos[Tiab] OR chiroptera[Tiab] OR chiropteras[Tiab] OR bat[Tiab] OR bats[Tiab] OR fox[Tiab] OR foxes[Tiab] OR donkey[Tiab] OR donkeys[Tiab] OR mule[Tiab] OR mules[Tiab] OR zebra[Tiab] OR zebras[Tiab] OR shrew[Tiab] OR shrews[Tiab] OR bison[Tiab] OR bisons[Tiab] OR buffalo[Tiab] OR buffaloes[Tiab] OR deer[Tiab] OR deers[Tiab] OR bear[Tiab] OR bears[Tiab] OR panda[Tiab] OR pandas[Tiab] OR “wild hog”[Tiab] OR “wild boar”[Tiab] OR fitchew[Tiab] OR fitch[Tiab] OR beaver[Tiab] OR beavers[Tiab] OR jerboa[Tiab] OR jerboas[Tiab] OR capybara[Tiab] OR capybaras[Tiab] OR canine [tiab] OR bovine [tiab] OR porcine [tiab] OR hog [tiab] OR hogs [tiab]) NOT medline[sb]))</p> |
| <p>Elsevier (Embase) - last searched 10<sup>th</sup> January 2023</p> | <p>(exp Asthma OR Asthma:ti,ab OR Respiratory hypersensitivity:ti,ab OR Wheeze*:ti,ab)<br/> AND<br/> (exp Pregnancy OR Maternal:ti,ab OR Gestat*:ti,ab OR Pregnan*:ti,ab)<br/> AND<br/> (exp animal experiment/ OR exp animal model/ OR exp experimental animal/ OR exp transgenic animal/ OR exp male animal/ OR exp female animal/ OR exp juvenile animal/ OR animal/ OR chordata/ OR vertebrate/ OR tetrapod/ OR amniote/ OR mammal/ OR therian/OR exp monotremate/ OR placental mammals/ OR exp marsupial/ OR Euarchontoglires/ OR exp Afrotheria/ OR exp Boreoeutheria/ OR exp Laurasiatheria/ OR exp Xenarthra/ OR primate/ OR exp Dermoptera/ OR exp Glires/ OR exp Scandentia/ OR Haplorhini/ OR exp prosimian/ OR simian/ OR exp tarsiiform/ OR Catarrhini/ OR exp Platyrrhini/ OR ape/ OR exp Cercopithecidae/ OR hominid/ OR exp hylobatidae/ OR exp chimpanzee/ OR exp gorilla/ OR exp orang utan/ OR<br/> (animal OR animals OR shrew OR shrews OR sorex OR araneus OR crocidura OR russula OR european mole OR talpa OR chiroptera OR bat OR bats OR eptesicus OR serotinus OR myotis OR dasycneme OR daubentonii OR</p>                                                                                                                                                                                                                                                                                                                                                                                                                                                                                                                                                                                                                                                                                                                                                                                                    |

|                                                                    |                                                                                                                                                                                                                                                                                                                                                                                                                                                                                                                                                                                                                                                                                                                                                                                                                                                                                                                                                                                                                                                                                                                                                                                                                                                                                                                                                                                                                                                                                                                                                                                                                                                                                                                                                                                                                                                                                                                                                                                                                                                                                                                                                                                                                                                                                                                                                                                                                                                                                                                                                                                                                                                                                                                                                                                                                                                     |
|--------------------------------------------------------------------|-----------------------------------------------------------------------------------------------------------------------------------------------------------------------------------------------------------------------------------------------------------------------------------------------------------------------------------------------------------------------------------------------------------------------------------------------------------------------------------------------------------------------------------------------------------------------------------------------------------------------------------------------------------------------------------------------------------------------------------------------------------------------------------------------------------------------------------------------------------------------------------------------------------------------------------------------------------------------------------------------------------------------------------------------------------------------------------------------------------------------------------------------------------------------------------------------------------------------------------------------------------------------------------------------------------------------------------------------------------------------------------------------------------------------------------------------------------------------------------------------------------------------------------------------------------------------------------------------------------------------------------------------------------------------------------------------------------------------------------------------------------------------------------------------------------------------------------------------------------------------------------------------------------------------------------------------------------------------------------------------------------------------------------------------------------------------------------------------------------------------------------------------------------------------------------------------------------------------------------------------------------------------------------------------------------------------------------------------------------------------------------------------------------------------------------------------------------------------------------------------------------------------------------------------------------------------------------------------------------------------------------------------------------------------------------------------------------------------------------------------------------------------------------------------------------------------------------------------------|
|                                                                    | <p>pipistrelle OR pipistrellus OR cat OR cats OR felis OR catus OR feline OR dog OR dogs OR canis OR canine OR canines OR otter OR otters OR lutra OR badger OR badgers OR meles OR fitchew OR fitch OR fougart or foulmart OR ferrets OR ferret OR polecat OR polecats OR mustela OR putorius OR weasel OR weasels OR fox OR foxes OR vulpes OR common seal OR phoca OR vitulina OR grey seal OR halichoerus OR horse OR horses OR equus OR equine OR equidae OR donkey OR donkeys OR mule OR mules OR pig OR pigs OR swine OR swines OR hog OR hogs OR boar OR boars OR porcine OR piglet OR piglets OR sus OR scrofa OR llama OR llamas OR lama OR glama OR deer OR deers OR cervus OR elaphus OR cow OR cows OR bos taurus OR bos indicus OR bovine OR bull OR bulls OR cattle OR bison OR bisons OR sheep OR sheeps OR ovis aries OR ovine OR lamb OR lambs OR mouflon OR mouflons OR goat OR goats OR capra OR caprine OR chamois OR rupicapra OR leporidae OR lagomorpha OR lagomorph OR rabbit OR rabbits OR oryctolagus OR cuniculus OR laprine OR hares OR lepus OR rodentia OR rodent OR rodents OR murinae OR mouse OR mice OR mus OR musculus OR murine OR woodmouse OR apodemus OR rat OR rats OR rattus OR norvegicus OR guinea pig OR guinea pigs OR cavia OR porcellus OR hamster OR hamsters OR mesocricetus OR cricetus OR gerbil OR gerbils OR jird OR jirds OR meriones OR unguiculatus OR jerboa OR jerboas OR jaculus OR chinchilla OR chinchillas OR beaver OR beavers OR castor fiber OR castor canadensis OR sciuridae OR squirrel OR squirrels OR sciurus OR chipmunk OR chipmunks OR marmot OR marmots OR marmota OR suslik OR susliks OR spermophilus OR cynomys OR cottonrat OR cottonrats OR sigmodon OR vole OR voles OR microtus OR myodes OR glareolus OR primate OR primates OR prosimian OR prosimians OR lemur OR lemurs OR lemuridae OR loris OR bush baby OR bush babies OR bushbaby OR bushbabies OR galago OR galagos OR anthropoidea OR anthropoids OR simian OR simians OR monkey OR monkeys OR marmoset OR marmosets OR callithrix OR cebuella OR tamarin OR tamarins OR saguinus OR leontopithecus OR squirrel monkey OR squirrel monkeys OR saimiri OR night monkey OR night monkeys OR owl monkey OR owl monkeys OR douroucoulis OR aotus OR spider monkey OR spider monkeys OR ateles OR baboon OR baboons OR papio OR rhesus monkey OR macaque OR macaca OR mulatta OR cynomolgus OR fascicularis OR green monkey OR green monkeys OR chlorocebus OR vervet OR vervets OR pygerythrus OR hominoidea OR ape OR apes OR hylobatidae OR gibbon OR gibbons OR siamang OR siamangs OR nomascus OR symphalangus OR hominidae OR orangutan OR orangutans OR pongo OR chimpanzee OR chimpanzees OR pan troglodytes OR bonobo OR bonobos OR pan paniscus OR gorilla OR gorillas OR troglodytes).ti,ab.)</p> |
| <p>Web of Science - last searched 10<sup>th</sup> January 2023</p> | <p>(Asthma OR Asthma OR "Respiratory hypersensitivity" OR Wheez* )<br/> AND<br/> (Pregnancy OR Maternal OR Gestat* OR Pregnan* )<br/> AND<br/> (("animal experimentation" OR "models, animal" OR "Animals" OR "animal population groups" OR "chordata" OR "vertebrates" OR "mammals" OR "primates" OR "artiodactyla" OR "carnivora" OR "cetacea" OR "chiroptera"</p>                                                                                                                                                                                                                                                                                                                                                                                                                                                                                                                                                                                                                                                                                                                                                                                                                                                                                                                                                                                                                                                                                                                                                                                                                                                                                                                                                                                                                                                                                                                                                                                                                                                                                                                                                                                                                                                                                                                                                                                                                                                                                                                                                                                                                                                                                                                                                                                                                                                                                |

|  |                                                                                                                                                                                                                                                                                                                                                                                                                                                                                                                                                                                                                                                                                                                                                                                                                                                                                                                                                                                                                                                                                                                                                                                                                                                                                                                                                                                                                                                                                                                                                                                                                                                                                                                                                                                                                                                                                                                                                                                                                                                                                                                                                                                                                                                                                                                                                                                                                                                                                                                                                                                                                                                                     |
|--|---------------------------------------------------------------------------------------------------------------------------------------------------------------------------------------------------------------------------------------------------------------------------------------------------------------------------------------------------------------------------------------------------------------------------------------------------------------------------------------------------------------------------------------------------------------------------------------------------------------------------------------------------------------------------------------------------------------------------------------------------------------------------------------------------------------------------------------------------------------------------------------------------------------------------------------------------------------------------------------------------------------------------------------------------------------------------------------------------------------------------------------------------------------------------------------------------------------------------------------------------------------------------------------------------------------------------------------------------------------------------------------------------------------------------------------------------------------------------------------------------------------------------------------------------------------------------------------------------------------------------------------------------------------------------------------------------------------------------------------------------------------------------------------------------------------------------------------------------------------------------------------------------------------------------------------------------------------------------------------------------------------------------------------------------------------------------------------------------------------------------------------------------------------------------------------------------------------------------------------------------------------------------------------------------------------------------------------------------------------------------------------------------------------------------------------------------------------------------------------------------------------------------------------------------------------------------------------------------------------------------------------------------------------------|
|  | <p>OR "elephants" OR "hyraxes" OR "lagomorpha" OR "marsupialia" OR "monotremata" OR "perissodactyla" OR "rodentia" OR "scandentia" OR "sirenia" OR "xenarthra" OR "haplorhini" OR "strepsirhini" OR "platyrrhini" OR "tarsii" OR "catarrhini" OR "cercopithecidae" OR "hylobatidae" OR "hominidae" OR "gorilla gorilla" OR "pan paniscus" OR "pan troglodytes" OR "pongo pygmaeus") OR (animals OR animal OR mice OR mus OR mouse OR murine OR woodmouse OR rats OR rat OR murinae OR muridae OR cottonrat OR cottonrats OR hamster OR hamsters OR cricetinae OR rodentia OR rodent OR rodents OR pigs OR pig OR swine OR swines OR piglets OR piglet OR boar OR boars OR "sus scrofa" OR ferrets OR ferret OR polecat OR polecats OR "mustela putorius" OR "guinea pigs" OR "guinea pig" OR cavia OR callithrix OR marmoset OR marmosets OR cebuella OR hapale OR octodon OR chinchilla OR chinchillas OR gerbillinae OR gerbil OR gerbils OR jird OR jirds OR merione OR meriones OR rabbits OR rabbit OR hares OR hare OR cats OR cat OR carus OR felis OR dogs OR dog OR canine OR canines OR canis OR sheep OR sheeps OR mouflon OR mouflons OR ovis OR goats OR goat OR capra OR capras OR rupicapra OR rupicapras OR chamois OR haplorhini OR monkey OR monkeys OR anthropoidea OR anthropoids OR saguinus OR tamarin OR tamarins OR leontopithecus OR hominidae OR ape OR apes OR "pan paniscus" OR bonobo OR bonobos OR "pan troglodytes" OR gibbon OR gibbons OR siamang OR siamangs OR nomascus OR symphalangus OR chimpanzee OR chimpanzees OR prosimian OR prosimians OR "bush baby" OR bush babies OR galagos OR galago OR pongidae OR gorilla OR gorillas OR "pongo pygmaeus" OR orangutan OR orangutans OR lemur OR lemurs OR lemuridae OR horse OR horses OR equus OR cow OR calf OR bull OR sciuridae OR squirrel OR squirrels OR chipmunk OR chipmunks OR suslik OR susliks OR vole OR voles OR lemming OR lemmings OR muskrat OR muskrats OR lemmus OR otter OR otters OR marten OR martens OR martes OR weasel OR badger OR badgers OR ermine OR mink OR minks OR sable OR sables OR gulo OR gulos OR wolverine OR wolverines OR mustela OR llama OR llamas OR alpaca OR alpacas OR camelid OR camelids OR guanaco OR guanacos OR chiroptera OR chiropteras OR bat OR bats OR fox OR foxes OR donkey OR donkeys OR mule OR mules OR zebra OR zebras OR shrew OR shrews OR bison OR bisons OR buffalo OR buffaloes OR deer OR deers OR bear OR bears OR panda OR pandas OR "wild hog" OR "wild boar" OR fitchew OR fitch OR beaver OR beavers OR jerboa OR jerboas OR capybara OR capybaras OR canine OR bovine OR porcine OR hog OR hogs))</p> |
|--|---------------------------------------------------------------------------------------------------------------------------------------------------------------------------------------------------------------------------------------------------------------------------------------------------------------------------------------------------------------------------------------------------------------------------------------------------------------------------------------------------------------------------------------------------------------------------------------------------------------------------------------------------------------------------------------------------------------------------------------------------------------------------------------------------------------------------------------------------------------------------------------------------------------------------------------------------------------------------------------------------------------------------------------------------------------------------------------------------------------------------------------------------------------------------------------------------------------------------------------------------------------------------------------------------------------------------------------------------------------------------------------------------------------------------------------------------------------------------------------------------------------------------------------------------------------------------------------------------------------------------------------------------------------------------------------------------------------------------------------------------------------------------------------------------------------------------------------------------------------------------------------------------------------------------------------------------------------------------------------------------------------------------------------------------------------------------------------------------------------------------------------------------------------------------------------------------------------------------------------------------------------------------------------------------------------------------------------------------------------------------------------------------------------------------------------------------------------------------------------------------------------------------------------------------------------------------------------------------------------------------------------------------------------------|

## Table S2 – ARRIVE 2.0 Guidelines

Taken verbatim from the published checklist.<sup>1</sup>

|                                                                                                                                                                                                                                                                                                                                                                                                                                                                                                                                                                                                                        |
|------------------------------------------------------------------------------------------------------------------------------------------------------------------------------------------------------------------------------------------------------------------------------------------------------------------------------------------------------------------------------------------------------------------------------------------------------------------------------------------------------------------------------------------------------------------------------------------------------------------------|
| <p>1. Study design</p> <p>For each experiment, provide brief details of study design including:</p> <ol style="list-style-type: none"><li>The groups being compared, including control groups. If no control group has been used, the rationale should be stated.</li><li>The experimental unit (e.g., a single animal, litter, or cage of animals).</li></ol>                                                                                                                                                                                                                                                         |
| <p>2. Sample size</p> <ol style="list-style-type: none"><li>Specify the exact number of experimental units allocated to each group, and the total number in each experiment. Also indicate the total number of animals used.</li><li>Explain how the sample size was decided. Provide details of any a priori sample size calculation, if done.</li></ol>                                                                                                                                                                                                                                                              |
| <p>3. Inclusion and exclusion criteria</p> <ol style="list-style-type: none"><li>Describe any criteria used for including and excluding animals (or experimental units) during the experiment, and data points during the analysis. Specify if these criteria were established a priori. If no criteria were set, state this explicitly.</li><li>For each experimental group, report any animals, experimental units, or data points not included in the analysis and explain why. If there were no exclusions, state so.</li><li>For each analysis, report the exact value of n in each experimental group.</li></ol> |
| <p>4. Randomization</p> <ol style="list-style-type: none"><li>State whether randomisation was used to allocate experimental units to control and treatment groups. If done, provide the method used to generate the randomization sequence.</li><li>Describe the strategy used to minimize potential confounders such as the order of treatments and measurements, or animal/cage location. If confounders were not controlled, state this explicitly.</li></ol>                                                                                                                                                       |
| <p>5. Blinding</p> <p>Describe who was aware of the group allocation at the different stages of the experiment (during the allocation, the conduct of the experiment, the outcome assessment, and the data analysis).</p>                                                                                                                                                                                                                                                                                                                                                                                              |
| <p>6. Outcome measures</p> <ol style="list-style-type: none"><li>Clearly define all outcome measures assessed (e.g., cell death, molecular markers, or behavioural changes).</li><li>For hypothesis-testing studies, specify the primary outcome measure, i.e., the outcome measure that was used to determine the sample size.</li></ol>                                                                                                                                                                                                                                                                              |
| <p>7. Statistical methods</p> <ol style="list-style-type: none"><li>Provide details of the statistical methods used for each analysis, including software used.</li><li>Describe any methods used to assess whether the data met the assumptions of the statistical approach, and what was done if the assumptions were not met.</li></ol>                                                                                                                                                                                                                                                                             |

|                                                                                                                                                                                                                                                                                                                                                                                                                                                   |
|---------------------------------------------------------------------------------------------------------------------------------------------------------------------------------------------------------------------------------------------------------------------------------------------------------------------------------------------------------------------------------------------------------------------------------------------------|
| <p>8. Experimental animals</p> <ol style="list-style-type: none"> <li>a. Provide species-appropriate details of the animals used, including species, strain and substrain, sex, age or developmental stage, and, if relevant, weight.</li> <li>b. Provide further relevant information on the provenance of animals, health/immune status, genetic modification status, genotype, and any previous procedures.</li> </ol>                         |
| <p>9. Experimental procedures</p> <p>For each experimental group, including controls, describe the procedures in enough detail to allow others to replicate them, including:</p> <ol style="list-style-type: none"> <li>a. What was done, how it was done, and what was used.</li> <li>b. When and how often.</li> <li>c. Where (including detail of any acclimatization periods).</li> <li>d. Why (provide rationale for procedures).</li> </ol> |
| <p>10. Results</p> <p>For each experiment conducted, including independent replications, report:</p> <ol style="list-style-type: none"> <li>a. Summary/descriptive statistics for each experimental group, with a measure of variability where applicable (e.g., mean and SD, or median and range).</li> <li>b. If applicable, the effect size with a confidence interval.</li> </ol>                                                             |
| <p>11. Abstract</p> <p>Provide an accurate summary of the research objectives, animal species, strain and sex, key methods, principal findings, and study conclusions.</p>                                                                                                                                                                                                                                                                        |
| <p>12. Background</p> <ol style="list-style-type: none"> <li>a. Include sufficient scientific background to understand the rationale and context for the study, and explain the experimental approach.</li> <li>b. Explain how the animal species and model used address the scientific objectives and, where appropriate, the relevance to human biology.</li> </ol>                                                                             |
| <p>13. Objectives</p> <p>Clearly describe the research question, research objectives and, where appropriate, specific hypotheses being tested.</p>                                                                                                                                                                                                                                                                                                |
| <p>14. Ethical statement</p> <ol style="list-style-type: none"> <li>a. Provide the name of the ethical review committee or equivalent that has approved the use of animals in this study, and any relevant license or protocol numbers (if applicable). If ethical approval was not sought or granted, provide a justification.</li> </ol>                                                                                                        |
| <p>15. Housing and husbandry</p> <p>Provide details of housing and husbandry conditions, including any environmental enrichment.</p>                                                                                                                                                                                                                                                                                                              |



|                                                                                                                                                                                                                                                                                                                                                                                                                                                                        |
|------------------------------------------------------------------------------------------------------------------------------------------------------------------------------------------------------------------------------------------------------------------------------------------------------------------------------------------------------------------------------------------------------------------------------------------------------------------------|
| <p>16. Animal care and monitoring</p> <ul style="list-style-type: none"> <li>a. Describe any interventions or steps taken in the experimental protocols to reduce pain, suffering, and distress.</li> <li>b. Report any expected or unexpected adverse events.</li> <li>c. Describe the humane endpoints established for the study, the signs that were monitored, and the frequency of monitoring. If the study did not have humane endpoints, state this.</li> </ul> |
| <p>17. Interpretation/scientific implications</p> <ul style="list-style-type: none"> <li>a. Interpret the results, taking into account the study objectives and hypotheses, current theory, and other relevant studies in the literature.</li> <li>b. Comment on the study limitations, including potential sources of bias, limitations of the animal model, and imprecision associated with the results.</li> </ul>                                                  |
| <p>18. Generalizability/translation</p> <p>Comment on whether, and how, the findings of this study are likely to generalize to other species or experimental conditions, including any relevance to human biology (where appropriate).</p>                                                                                                                                                                                                                             |
| <p>19. Protocol registration</p> <p>Provide a statement indicating whether a protocol (including the research question, key design features, and analysis plan) was prepared before the study, and if and where this protocol was registered.</p>                                                                                                                                                                                                                      |
| <p>20. Data access</p> <p>Provide a statement describing if and where study data are available.</p>                                                                                                                                                                                                                                                                                                                                                                    |
| <p>21. Declaration of interests</p> <ul style="list-style-type: none"> <li>a. Declare any potential conflicts of interest, including financial and nonfinancial. If none exist, this should be stated.</li> <li>b. List all funding sources (including grant identifier) and the role of the funder(s) in the design, analysis, and reporting of the study.</li> </ul>                                                                                                 |

Table S3 - Description of included studies and maternal asthma induction

| Study ID; design                                                     | Animal (species/strain)                   | Aim/hypothesis                                                                                                                                                                                                                                                                                                                 | Induction protocol start relative to pregnancy | Allergen used for sensitisation, adjuvant and timing                                           | Airway challenge frequency and timing                                                            | Outcomes reported |           |                  |                   |
|----------------------------------------------------------------------|-------------------------------------------|--------------------------------------------------------------------------------------------------------------------------------------------------------------------------------------------------------------------------------------------------------------------------------------------------------------------------------|------------------------------------------------|------------------------------------------------------------------------------------------------|--------------------------------------------------------------------------------------------------|-------------------|-----------|------------------|-------------------|
|                                                                      |                                           |                                                                                                                                                                                                                                                                                                                                |                                                |                                                                                                |                                                                                                  | Maternal          | Placental | Pregnancy/ Fetal | Postnatal progeny |
| Abdala-Valencia 2014; Non-Randomised experimental study <sup>2</sup> | Mouse (C57BL/6)                           | Therefore, we determined whether $\alpha$ -T blocked development of allergic responses in offspring of allergic female mice.                                                                                                                                                                                                   | before                                         | OVA (200 $\mu$ l) + potassium aluminium sulphate (1 mg) i.p. injection on day 0 and 7 of study | 15 min 3% OVA in saline on three consecutive days at 8, 12, and 16 weeks of age; once at week 18 |                   |           | ✓                | ✓                 |
| Abdala-Valencia 2016; Non-Randomised experimental study <sup>3</sup> | Mouse (C57BL/6)                           | We determined whether $\gamma$ -T augments development of allergic responses in offspring of allergic female mice.                                                                                                                                                                                                             | before                                         | OVA (200 $\mu$ l) + potassium aluminium sulphate (1 mg) i.p. injection on day 0 and 7 of study | 20 min, 3% OVA in saline, three times a week at 4, 8, 12, and 16 weeks of age                    | ✓                 |           | ✓                | ✓                 |
| Akkoc 2008; Non-Randomised experimental study <sup>4</sup>           | Mouse (BALB/c)                            | We aimed to determine the effect of single Mycobacterium vaccae immunisation to OVA-sensitized pregnant mice on IL-5 and IFN- $\gamma$ secretion from placental lymphocytes and splenocytes of offspring.                                                                                                                      | before                                         | OVA (10 $\mu$ l) i.p. injection 28, 14, and 7 days before mating                               | 20 min challenges, 1% OVA in saline, every second day during gestation                           | ✓                 | ✓         |                  | ✓                 |
| Allina 2011; Pilot study experimental study <sup>5</sup>             | Mouse (Outbred CD-1 male and female mice) | This pilot study examined the long-term effect of maternal allergen challenge and/or cigarette smoking during pregnancy on hepatic inflammation and fibrosis in adult mouse offspring. In the studies reported here, we sought to determine whether fetal stress due to maternal allergy and/or in utero exposure to cigarette | before                                         | OVA (10 mg) + alum (2 mg) i.p. injection on days 0 and 7 of study                              | 50 $\mu$ l of OVA (2 $\mu$ g/mL PBS) 1 and 2 weeks after injection                               | ✓                 |           | ✓                | ✓                 |

|                                                                |                               |                                                                                                                                                                                                                                                 |        |                                                                                                                                                                                                                  |                                                                                                   |   |  |  |   |
|----------------------------------------------------------------|-------------------------------|-------------------------------------------------------------------------------------------------------------------------------------------------------------------------------------------------------------------------------------------------|--------|------------------------------------------------------------------------------------------------------------------------------------------------------------------------------------------------------------------|---------------------------------------------------------------------------------------------------|---|--|--|---|
|                                                                |                               | smoke alters adult off-spring liver fat content, inflammation or cytokine mRNA expression using an animal model                                                                                                                                 |        |                                                                                                                                                                                                                  |                                                                                                   |   |  |  |   |
| Babayigit 2008; Non-Randomised experimental study <sup>6</sup> | Mouse (BALB/c)                | The aim of this study was to evaluate the histopathologic changes of the lung in newborn mice born from asthmatic mothers                                                                                                                       | before | OVA (10 µg/0.1 mL) + alum i.p. injection on days 0 and 14 of study                                                                                                                                               | 30 min 2.5% OVA in saline three times a week for weeks 3 to 11 of study                           | ✓ |  |  | ✓ |
| Barrett 2003; Non-Randomised experimental study <sup>7</sup>   | Dog (Beagle)                  | Using our canine model of allergic disease, we sought to confirm and further explore these human studies which indicate that parental/maternal allergic status may influence the development of allergic sensitization and asthma in offspring. | before | Ragweed extract (500 µg) + aluminium hydroxide i.p. injection within 24 h of birth and weekly for postnatal weeks 1-4, subcutaneous injections (50 µg ragweed + alum) weekly for weeks 5-8, biweekly weeks 10-22 | 500 µg ragweed protein during 2 exposures 2 weeks apart, and another 45 days later                |   |  |  | ✓ |
| Carpe 2012; Non-Randomised experimental study <sup>8</sup>     | Rat (Brown Norway) and Lewis) | We aimed to determine whether maternal allergen exposure would influence asthma pathogenesis by reprogramming primary patterns of developmental lung gene expression in progeny.                                                                | before | OVA (1 mg) + aluminium hydroxide (100 mg in 1 mL saline) + heat killed <i>Bordetella pertussis</i> ( $2 \times 10^9$ in 0.5 mL saline) i.p. injection 14 days prior to mating                                    | 30 min 1% OVA in saline on GD 1, 7, 13 and 19                                                     |   |  |  | ✓ |
| Church 2021; Randomised experimental study <sup>9</sup>        | Mouse (C57BL/6J)              | The goal of this study was to characterise the developmental impact of repeated allergic asthma inflammation during pregnancy on offspring behavioural outcomes and brain inflammation.                                                         | before | OVA (10 µg) + aluminium hydroxide (1 mg) i.p. injection at 6-7 weeks of age – prior to                                                                                                                           | 45 min 1% OVA in saline daily on GD 2-9 (early group) or GD 10-17 (late group) between 0800 h and | ✓ |  |  | ✓ |

|                                                                            |                |                                                                                                                                                                                                                                                                                                     |        |                                                                                 |                                                                                                                       |   |   |   |   |
|----------------------------------------------------------------------------|----------------|-----------------------------------------------------------------------------------------------------------------------------------------------------------------------------------------------------------------------------------------------------------------------------------------------------|--------|---------------------------------------------------------------------------------|-----------------------------------------------------------------------------------------------------------------------|---|---|---|---|
|                                                                            |                |                                                                                                                                                                                                                                                                                                     |        | mating at week 8                                                                | 1000 h                                                                                                                |   |   |   |   |
| Clifton 2016;<br>Randomised<br>experimental<br>study <sup>10</sup>         | Sheep (Merino) | We aimed to characterise maternal lung and cardiovascular responses and fetal-placental growth and lung surfactant levels in a sheep model of allergic asthma.                                                                                                                                      | before | HDM (50 µg) + aluminium hydroxide (50 µg) subcutaneous injection x4 fortnightly | 1 mg HDM in saline weekly for 8 weeks before mating, then fortnightly during pregnancy                                | ✓ | ✓ | ✓ |   |
| Clifton 2019;<br>Randomised<br>experimental<br>study <sup>11</sup>         | Sheep (Merino) | Our aim was to examine the effect of maternal asthma on placental glucocorticoid receptor profiles using a pregnant sheep model of asthma                                                                                                                                                           | before | HDM (50 µg) + aluminium hydroxide (50 µg) subcutaneous injection x4 fortnightly | 1 mg HDM in saline weekly for 8 weeks before mating, then fortnightly during pregnancy                                | ✓ | ✓ | ✓ |   |
| Fedulov 2005;<br>Non-<br>Randomised<br>experimental<br>study <sup>12</sup> | Mouse (BALB/c) | We tested the potential of CpG oligodeoxynucleotides to reverse the increased susceptibility to allergic airways disease in neonatal mice in a model of maternal transmission of asthma risk.                                                                                                       | before | OVA (5 µg) + alum (1 mg) i.p. injection at PD 3 and 7                           | After weaning, 10 min 3% OVA in PBS on 3 consecutive days at 4, 8, 12 weeks of age; mating occurred immediately after |   |   |   | ✓ |
| Fedulov 2007;<br>Non-<br>Randomised<br>experimental<br>study <sup>13</sup> | Mouse (BALB/c) | We hypothesised that the suboptimal sensitisation and challenge protocol may be still effective in offspring from asthmatic mothers even if sensitising injection is given much later in life. Therefore, we investigated the duration of increased susceptibility to maternally transmitted asthma | before | OVA (5 µg) + alum (1 mg) i.p. injection at PD 5 and 9                           | After weaning, 10 min 3% OVA in PBS on 3 consecutive days at 4, 8, 12 weeks of age; mating occurred immediately after |   |   |   | ✓ |
| Fedulov 2011;<br>Non-<br>Randomised<br>experimental<br>study <sup>14</sup> | Mouse (BALB/c) | We hypothesised that maternal allergy leads to epigenetic alterations in the dendritic cells of developing neonates.                                                                                                                                                                                | before | OVA (5 µg) + alum (1 mg) i.p. injection at PD 3 and 7                           | After weaning, 10 min 3% OVA in PBS on 3 consecutive days at 4, 8, 12 weeks of age                                    | ✓ |   |   | ✓ |
| Feng 2012;<br>Randomised                                                   | Rat (Sprague-  | In this study, we observed the effects of allergisation via OVA on rat pups born of asthmatic dams and the                                                                                                                                                                                          | early  | OVA (100 mg) + aluminium hydroxide                                              | 30 min 1% OVA daily                                                                                                   |   |   |   | ✓ |

|                                                               |                        |                                                                                                                                                                                                                                                           |                |                                                                                                                      |                                                                                      |   |  |  |   |
|---------------------------------------------------------------|------------------------|-----------------------------------------------------------------------------------------------------------------------------------------------------------------------------------------------------------------------------------------------------------|----------------|----------------------------------------------------------------------------------------------------------------------|--------------------------------------------------------------------------------------|---|--|--|---|
| experimental study <sup>15</sup>                              | Dawley)                | relatedness between the alteration of adrenal medulla chromaffin cells and increased asthma susceptibility in such offspring has not been established                                                                                                     | gestation      | (200 mg) + heat-killed <i>Bordetella pertussis</i> (6 x 10 <sup>9</sup> in 1 mL saline) i.p. injection on GD 0 and 7 | from GD 14 to 21                                                                     |   |  |  |   |
| Gerhold 2012; Non-Randomised experimental study <sup>16</sup> | Mouse (BALB/c)         | We investigated the effect of maternal allergen exposures during pregnancy on allergen-induced sensitisation and airway inflammation in the offspring in a murine model.                                                                                  | before         | <i>Not stated</i>                                                                                                    | 20 min, OVA, three times per week from GD 7 until delivery                           | ✓ |  |  | ✓ |
| Hamada 2003; Non-Randomised experimental study <sup>17</sup>  | Mouse (BALB/c)         | This study sought to test the hypothesis that biologic transfer of mediator(s) from mother to child can cause increased susceptibility to development of allergic asthma.                                                                                 | before         | OVA (5 µg) + alum (1 mg) i.p. injection at PD 3 and 7                                                                | 10 min 3% OVA in PBS on 3 consecutive days at 4, 8, 12 weeks of age                  | ✓ |  |  | ✓ |
| Heller 2014; Randomised experimental study <sup>18</sup>      | Cat (strain not given) | The aims of this study were to create a more 'natural' model of feline asthma by exposing offspring of asthmatic queens to Bermuda grass allergen by inhalation only, and to investigate maternal-fetal-infant interactions in the development of asthma. | late gestation | <i>Not applicable - spontaneous asthma protocol</i>                                                                  | Bermuda grass allergen (100 g) x3 each 6 days apart during last 20 days of gestation |   |  |  | ✓ |
| Herz 2001; Non-Randomised experimental study <sup>19</sup>    | Mouse (BALB/c)         | We assessed whether allergic sensitisation and allergen exposure during pregnancy favour the postnatal onset of allergy in the neonate.                                                                                                                   | before         | OVA (10 µg) + aluminium hydroxide (1.5 mg) i.p. injection 28, 14, and 7 days prior to mating                         | 20 min 1% OVA in PBS every second day during gestation                               | ✓ |  |  | ✓ |
| Hubeau 2006; Non-Randomised experimental study <sup>20</sup>  | Mouse (BALB/c)         | We tested the role of allergen-specific T cells in the maternal transmission of asthma risk by modifying a model where offspring of asthmatic mothers are more prone to develop asthma after an intentionally suboptimal asthma induction.                | before         | OVA specific DO11.10 strain T cells (5 x 10 <sup>6</sup> ) i.p. injection 3 days prior to mating                     | 10 min 3% OVA for days 1-3 prior to mating                                           | ✓ |  |  | ✓ |

|                                                                      |                       |                                                                                                                                                                                                                                                                                                       |        |                                                                                                         |                                                                                                                                                                 |   |  |  |   |
|----------------------------------------------------------------------|-----------------------|-------------------------------------------------------------------------------------------------------------------------------------------------------------------------------------------------------------------------------------------------------------------------------------------------------|--------|---------------------------------------------------------------------------------------------------------|-----------------------------------------------------------------------------------------------------------------------------------------------------------------|---|--|--|---|
| Hubeau 2007;<br>Non-Randomised experimental study <sup>21</sup>      | Mouse (BALB/c)        | In this study, we examined the effects of neonatal antibody treatments targeting T cell populations on the development of an asthma syndrome                                                                                                                                                          | before | OVA (5 µg) + aluminium hydroxide (1 mg) i.p. injection on PD 5 and 9                                    | 10 min 3% OVA from 3 weeks to 3 months every 4 weeks, prior to mating                                                                                           |   |  |  | ✓ |
| Lebold 2022;<br>Non-Randomised experimental study <sup>22</sup>      | Mouse (C57Bl/6J mice) | Here we tested whether maternal asthma skews asthma phenotypes in offspring.                                                                                                                                                                                                                          | before | <i>Not stated</i>                                                                                       | HDM (25 µg) + Lipopolysaccharide from E. coli (3857 EU/mg) for 5 days per week for 4 weeks total, before mating, then continuing 5 days per week until delivery | ✓ |  |  | ✓ |
| Leme 2006;<br>Non-Randomised experimental study <sup>23</sup>        | Mouse (BALB/c)        | We sought to experimentally test the potential contribution of breast milk mediator(s) in a mouse model of maternal transmission of asthma risk by evaluating the effect of adoptive nursing on asthma susceptibility in the offspring.                                                               | before | OVA (5 µg) + alum (1 mg) i.p. injection at PD 5 and 9                                                   | After weaning, 10 min 3% OVA in PBS on 3 consecutive days at 4, 8, and 12 weeks of age                                                                          |   |  |  | ✓ |
| Lenz 2019;<br>Randomised experimental study <sup>24</sup>            | Rat (Sprague Dawley)  | Mast cells are known for their roles in allergic responses, thus in this study we sought to determine if exposure to an allergic response of the pregnant female in utero would alter the sexual differentiation of the preoptic area of offspring and resulting sociosexual behaviour in later life. | before | OVA (1 mg) + aluminium hydroxide (1 mg) subcutaneous injection, two doses, 3 and 1 week prior to mating | OVA 1% in saline (50 µl per nostril) at GD 15                                                                                                                   | ✓ |  |  | ✓ |
| Lopez-Exposito 2015; Non-Randomised experimental study <sup>25</sup> | Mouse (BALB/c)        | In this current report we explored airway responses in offspring to first-ever exposure to maternally encountered and irrelevant antigens without prior sensitization and further investigated their modification by preconception maternal treatment with Anti-asthma Simplified Herbal Medicine     | before | OVA (100 µg) + alum (2 mg) i.p. injection                                                               | OVA (100 µg) in PBS weekly for 3 weeks, then 4 weeks later 2 further consecutive day challenges                                                                 | ✓ |  |  | ✓ |

|                                                                           |                                                                      | Intervention or Dexamethasone                                                                                                                                                                                   |        |                                                                                                                                                                                                                                                                                                                                               |                                                                                                                    |   |   |   |   |
|---------------------------------------------------------------------------|----------------------------------------------------------------------|-----------------------------------------------------------------------------------------------------------------------------------------------------------------------------------------------------------------|--------|-----------------------------------------------------------------------------------------------------------------------------------------------------------------------------------------------------------------------------------------------------------------------------------------------------------------------------------------------|--------------------------------------------------------------------------------------------------------------------|---|---|---|---|
| Matson 2007;<br>Non-<br>Randomised<br>experimental<br>study <sup>26</sup> | Mouse<br>(C57BL/6J)                                                  | We hypothesized that recall Th1- or Th2-type immune responses during pregnancy would result in transfer of maternal factors that would differentially impact development of immune responsiveness in offspring. | before | OVA (25 µg) +<br>Complete Freund's<br>Adjuvant with <i>killed</i><br><i>Mycobacterium</i><br><i>tuberculosis</i> (250 µg)<br>i.p. injection, then<br>second injection with<br>Incomplete Freund's<br>Adjuvant 7+ days after<br><br><b>OR</b><br><br>OVA (25 µg) +<br>aluminium hydroxide (2<br>mg) i.p. injection, 2x<br>separated by 7+ days | 1 hour 1% OVA in saline<br>for 7 consecutive days,<br>9-35 days after<br>immunisation, 6-8<br>weeks before mating  | ✓ |   |   | ✓ |
| Matson 2009;<br>Non-<br>Randomised<br>experimental<br>study <sup>27</sup> | Mouse<br>(C57BL/6J and B<br>cell-deficient<br>H6AAD)                 | The aim of this study was to evaluate the contribution of breastmilk and maternal B cell immunity from allergic mothers in the vertical transmission of protection from allergic airway disease.                | before | OVA (25 OR 8 µg) +<br>aluminium hydroxide (2<br>mg) i.p. injection at 6<br>and 7 weeks of age                                                                                                                                                                                                                                                 | 1 hour 1% OVA in saline<br>for 7 consecutive days,<br>7-12 days after<br>immunisation, 42-55<br>days before mating |   |   |   | ✓ |
| Matson 2010;<br>Non-<br>Randomised<br>experimental<br>study <sup>28</sup> | Mouse<br>(C57BL/6J-<br>wildtype and<br>FcRn <sup>-/-</sup> knockout) | The aim of this study was to investigate the role of offspring neonatal Fc receptor for IgG uptake by intestinal epithelial cells in this breast milk transferred protection from allergy                       | before | OVA (0.32 µg) +<br>aluminium hydroxide<br>(0.08 mg) per gram<br>body weight i.p.<br>injection, 2x 7 days<br>apart                                                                                                                                                                                                                             | 1 hour 1% OVA in saline<br>for 4 or 7 consecutive<br>days, 10-19 days<br>following second<br>injection             | ✓ |   |   | ✓ |
| Meakin 2021;<br>Randomised<br>experimental                                | Sheep (Merino)                                                       | Our aim was to explore whether the sheep placenta expresses androgen receptor isoforms and determine if the differential expression of androgen receptor                                                        | before | HDM (50 µg) +<br>aluminium hydroxide<br>(50 µg) subcutaneous                                                                                                                                                                                                                                                                                  | 1 mg HDM in saline<br>weekly for 8 weeks<br>before mating, then<br>fortnightly during                              | ✓ | ✓ | ✓ |   |

|                                                                     |                                                                        |                                                                                                                                                                                                                                                                                                                                                                          |        |                                                                                                                                                      |                                                                                             |   |  |   |   |
|---------------------------------------------------------------------|------------------------------------------------------------------------|--------------------------------------------------------------------------------------------------------------------------------------------------------------------------------------------------------------------------------------------------------------------------------------------------------------------------------------------------------------------------|--------|------------------------------------------------------------------------------------------------------------------------------------------------------|---------------------------------------------------------------------------------------------|---|--|---|---|
| study <sup>29</sup>                                                 |                                                                        | protein isoforms is altered by maternal asthma.                                                                                                                                                                                                                                                                                                                          |        | injection x4 fortnightly                                                                                                                             | pregnancy                                                                                   |   |  |   |   |
| Nakata 2010; Non-Randomised experimental study <sup>30</sup>        | Mouse (C57BL/6, FcRn <sup>+/-</sup> and FcRn <sup>-/-</sup> knockouts) | First, we confirmed that the development of allergic airway inflammation is reduced in an FcRn-dependent manner by sensitizing mother mice before pregnancy and inducing allergy. Next, we determined whether antigen-specific IgG in breast milk can reduce the development of allergic airway inflammation in offspring which were sensitized and challenged with OVA. | before | OVA (50 µg) + alum (1 mg) i.p. injections, 2-3 times                                                                                                 | 30 min 1% OVA in PBS on 3 consecutive days                                                  |   |  |   | ✓ |
| Pucheu-Haston 2009; Non-Randomised experimental study <sup>31</sup> | Mouse (BALB/c)                                                         | We hypothesized that pregnancy would be associated with an enhanced maternal allergic response to <i>Metarhizium anisopliae</i> fungal extract                                                                                                                                                                                                                           | before | <i>Metarhizium anisopliae</i> fungus (40 µg) in Hank's buffered salt solution (50 µl) intratracheal aspiration on days 1 and 7 of study to sensitise | Intratracheal <i>Metarhizium anisopliae</i> challenges on GD 11, 15, 19                     | ✓ |  |   |   |
| Pucheu-Haston 2010; Non-Randomised experimental study <sup>32</sup> | Mouse (BALB/c)                                                         | In this study, a respiratory allergen exposure model was used to determine the impact of maternal sensitization (with or without additional exposures during pregnancy) on subsequent pup responses to homologous or heterologous allergen.                                                                                                                              | before | <i>Metarhizium anisopliae</i> (40 µg) in Hank's buffered salt solution (50 µl) intratracheal aspiration 14 and 7 days before mating                  | Intratracheal <i>Metarhizium anisopliae</i> challenges on GD 11, 15, 19                     | ✓ |  | ✓ | ✓ |
| Pulczinski 2021; Non-Randomised experimental study <sup>33</sup>    | Mouse (C57Bl/6J)                                                       | Here we use a mouse model of allergic lung disease to examine the effects of pre- and perinatal HDM allergen exposure on offspring phenotypic and transcriptional outcomes in three generations.                                                                                                                                                                         | before | HDM (100 µg) i.p. injection, 2 weeks prior to mating                                                                                                 | HDM (100 µg) intratracheal instillation 3x per week during pregnancy and 3 weeks postpartum |   |  |   | ✓ |
| Schwartzter 2015; Randomised                                        | Mouse (C57Bl/6J)                                                       | We used a mouse model of maternal allergic asthma to test this novel hypothesis that early fetal priming with an allergenic exposure during gestation produces                                                                                                                                                                                                           | before | OVA (10 µg) + aluminium hydroxide (1 mg) i.p. injection on PD                                                                                        | 45 min 1% OVA in PBS on GD 9.5, 12.5, 17.5                                                  | ✓ |  |   | ✓ |



|                                                                 |                              |                                                                                                                                                                                                                                                                                                                                                |                 |                                                                                                                               |                                                                                        |   |   |   |   |
|-----------------------------------------------------------------|------------------------------|------------------------------------------------------------------------------------------------------------------------------------------------------------------------------------------------------------------------------------------------------------------------------------------------------------------------------------------------|-----------------|-------------------------------------------------------------------------------------------------------------------------------|----------------------------------------------------------------------------------------|---|---|---|---|
| experimental study <sup>34</sup>                                |                              | behavioural deficits in offspring                                                                                                                                                                                                                                                                                                              |                 | 42 and 49, one week prior to mating                                                                                           |                                                                                        |   |   |   |   |
| Schwartzter 2017; Randomised experimental study <sup>35</sup>   | Mouse (C57 and FVB/Ant mice) | Based on the distinct allergy-sensitive immune responses of these two strains, we hypothesised that unique developmental consequences would occur in offspring following maternal allergy-asthma exposure.                                                                                                                                     | before          | OVA (10 µg) + aluminium hydroxide (1 mg) i.p. injection on PD 42 and 49, one week prior to mating                             | 45 min 1% OVA in PBS on GD 9.5, 12.5, 17.5                                             | ✓ |   |   | ✓ |
| Sodemann 2020; Non-Randomised experimental study <sup>36</sup>  | Mouse (BALB/c)               | Using a mouse model, we examined how maternal allergic airway inflammation during pregnancy influenced offspring experimental asthma severity, as well as maternal and offspring serum IgG antibody glycosylation patterns. Additionally, the effects of maternal and offspring exposure to the same or different allergens were investigated. | before          | CAS (10 µg) or OVA (10 µg) adjuvant-free subcutaneous injection at 8, 9, and 10 weeks of age before mating at 12 weeks of age | 20 min 1% CAS or OVA on GD 6, 8, 10, 12, 14, 16                                        | ✓ |   |   |   |
| Tamayo 2022; Randomised experimental study <sup>37</sup>        | Mouse (C57BL/6J)             | To further elucidate if there is neuroinflammation in the fetus following maternal allergic airway disease, we investigated how allergic asthma impacts the maternal environment and inflammatory markers in the placenta and fetal brain during gestation.                                                                                    | before          | OVA (10 µg) + aluminium hydroxide (1 mg) i.p. injection at 6 and 7 weeks of age, before mating at 8 weeks                     | 45 min 1% OVA in PBS at GD 9.5, 12.5, 17.5                                             | ✓ | ✓ | ✓ |   |
| Vogel Ciernia 2018; Randomised experimental study <sup>38</sup> | Mouse (C57Bl/6J)             | We tested the hypothesis that epigenomic alterations to microglia may be involved in behavioural abnormalities observed in maternal allergic asthma offspring.                                                                                                                                                                                 | early gestation | OVA (10 µg) + aluminium hydroxide (1 mg) i.p. injection at PD 42 and 49, one week prior to mating                             | 45 min 1% OVA in PBS at GD 9.5, 12.5, 17.5                                             |   |   |   | ✓ |
| Wooldridge 2019; Randomised experimental study <sup>39</sup>    | Sheep (Merino)               | We hypothesised that fetal lung structure and immune phenotype in late gestation fetal sheep would be impaired in our sheep model of maternal allergic asthma during pregnancy                                                                                                                                                                 | before          | HDM (50 µg) + aluminium hydroxide (50 µg) subcutaneous injection x4 fortnightly                                               | 1 mg HDM in saline weekly for 8 weeks before mating, then fortnightly during pregnancy | ✓ |   | ✓ |   |

|                                                               |                          |                                                                                                                                                                  |                    |                                                                                                                                                                        |                                      |   |  |  |   |
|---------------------------------------------------------------|--------------------------|------------------------------------------------------------------------------------------------------------------------------------------------------------------|--------------------|------------------------------------------------------------------------------------------------------------------------------------------------------------------------|--------------------------------------|---|--|--|---|
| Wu 2011;<br>Randomised<br>experimental<br>study <sup>40</sup> | Rat (Sprague-<br>Dawley) | This study aims to explore the influence of maternal asthma during pregnancy on the development and function of adrenal medulla in offspring from PD 3 to PD 60. | early<br>gestation | OVA (100 mg) +<br>aluminium hydroxide<br>(200 mg) + heat-killed<br><i>Bordetella pertussis</i> (6 x<br>10 <sup>9</sup> in 1 mL saline) i.p.<br>injection on GD 0 and 7 | 30 min 1% OVA daily<br>from GD 14-21 | ✓ |  |  | ✓ |
|---------------------------------------------------------------|--------------------------|------------------------------------------------------------------------------------------------------------------------------------------------------------------|--------------------|------------------------------------------------------------------------------------------------------------------------------------------------------------------------|--------------------------------------|---|--|--|---|

✓ = study explored outcomes in this category, alum = aluminium based adjuvant, FcRn = neonatal Fc Receptor for IgG, GD = days of gestational age, HDM = house dust mite, IgG = immunoglobulin G, i.p. = intraperitoneal OVA = ovalbumin, PBS = phosphate-buffered saline, PD = postnatal day, Th1 = T helper cells type 1, Th2 = T helper cells type 2

Table S4 – Maternal outcomes

| Study ID; species; allergen                   | Outcome name                         | Brief methods                    | Pregnancy stage or age at outcome measure; timing of measurements                           | Findings in asthmatic animals (ref: controls)                                                                                                                                                                                                                                                                                    | Validates asthma phenotype? |
|-----------------------------------------------|--------------------------------------|----------------------------------|---------------------------------------------------------------------------------------------|----------------------------------------------------------------------------------------------------------------------------------------------------------------------------------------------------------------------------------------------------------------------------------------------------------------------------------|-----------------------------|
| Endocrine outcomes                            |                                      |                                  |                                                                                             |                                                                                                                                                                                                                                                                                                                                  |                             |
| Church 2021; mouse; OVA <sup>9</sup>          | Serum corticosterone concentration   | ELISA                            | Early: GD 2 and GD9. Late: GD9 and GD17; immediately after first or last allergen challenge | Higher corticosterone concentration in PBS and OVA exposed animals at earlier (GD2 and 9) and later time points (GD 9 and 17) compared to controls (~4-5-fold)                                                                                                                                                                   | N                           |
| Wu 2011; rat; OVA <sup>40</sup>               | Serum adrenaline concentration       | ELISA                            | <i>Unclear</i> ; maternal challenges were daily from GD 14-21                               | No differences                                                                                                                                                                                                                                                                                                                   | N                           |
| Wu 2011; rat; OVA <sup>40</sup>               | Serum corticosterone concentration   | ELISA                            | <i>Unclear</i> ; maternal challenges were daily from GD 14-21                               | Higher plasma concentrations (~2.4 fold)                                                                                                                                                                                                                                                                                         | N                           |
| Wu 2011; rat; OVA <sup>40</sup>               | Serum nerve growth factor            | ELISA                            | <i>Unclear</i> ; maternal challenges were daily from GD 14-21                               | Higher concentrations (~2.2 fold)                                                                                                                                                                                                                                                                                                | N                           |
| Immune outcomes                               |                                      |                                  |                                                                                             |                                                                                                                                                                                                                                                                                                                                  |                             |
| Abdala-Valencia 2016; mouse; OVA <sup>3</sup> | OVA-specific IgE                     | ELISA                            | GD 18                                                                                       | Higher concentrations in asthmatic mothers from basal diet (~1.5 fold) and 250 mg $\gamma$ -T diet (~2 fold)                                                                                                                                                                                                                     | N                           |
| Allina 2011; mouse; OVA <sup>5</sup>          | OVA-specific IgE concentration       | ELISA                            | before pregnancy; within 24 hours of final challenge                                        | Higher OVA-specific IgE concentration (~5.5 fold)                                                                                                                                                                                                                                                                                | N                           |
| Church 2021; mouse; OVA <sup>9</sup>          | Serum cytokines                      | Multiplex bead-based immunoassay | Early: GD 9. Late: GD17; four hours after last allergen challenge                           | Higher concentration in early OVA exposed group: IFN- $\gamma$ (~27 fold), IL-1 $\beta$ (~9 fold), IL-5 (~5 fold), IL-6 (~7 fold), IL-10 (~21 fold), IL-17A (3.5 fold), IL-18 (~7 fold), IL-22 (~23 fold), IL-23 (~20.5 fold), TNF $\alpha$ (3.5 fold).<br>No differences in GM-CSF, IL-2, IL-4, IL-9, IL-12 (p70), IL-13, IL-27 | N                           |
| Church 2021; mouse; OVA <sup>9</sup>          | Serum OVA-specific IgE concentration | ELISA                            | Early: GD 9. Late: GD 17; four hours after last allergen challenge                          | ~25-fold higher concentration in the OVA challenged groups compared to control PBS group                                                                                                                                                                                                                                         | N                           |
| Clifton 2016; sheep; HDM <sup>10</sup>        | BAL lung immune response             | Kwik-Diff stain and light        | Pre-mating, at mid-pregnancy (GD 50-65) and in late pregnancy                               | Lower percentage of lymphocytes post-challenge at pre-mating timepoint (~0.7 fold). Higher percentage of                                                                                                                                                                                                                         | Y                           |

|                                               |                                       |                                      |                                                                               |                                                                                                                                                                                                                                                                                                                                  |   |
|-----------------------------------------------|---------------------------------------|--------------------------------------|-------------------------------------------------------------------------------|----------------------------------------------------------------------------------------------------------------------------------------------------------------------------------------------------------------------------------------------------------------------------------------------------------------------------------|---|
|                                               |                                       | microscopy                           | (GD 118-132); prior to (0 h) and after (48 h) aerosol challenges              | macrophages in late pregnancy for pre-challenges (~1.1 fold) and lower post-challenge (~0.5 fold). Higher percentage of eosinophils after challenge in pre-mating (~4.5 fold) and late pregnancy (~9.5 fold). No differences for neutrophils, or at other time points, pre- or post-challenge.                                   |   |
| Gerhold 2012; mouse; OVA <sup>16</sup>        | OVA-specific IgE                      | ELISA                                | <i>Not reported</i> ; after OVA challenges three times a week from GD 7 to 21 | No differences in OVA-specific IgE                                                                                                                                                                                                                                                                                               | N |
| Hamada 2003; mouse; OVA <sup>17</sup>         | BAL lung immune response              | BALF cell stain & count              | 4 weeks; after allergen aerosols at weeks 4 (also given weeks 8 and 12)       | Higher BAL eosinophil number (~35 fold; similar results at 8, 12, and 2 weeks postnatal but data not shown)                                                                                                                                                                                                                      | Y |
| Herz 2001; mouse; OVA <sup>19</sup>           | T cell populations in antibody titers | Flow cytometry and ELISA             | PD 1-2; OVA challenges every second day during pregnancy                      | No difference in frequencies of IFN- $\gamma$ or IL-4 producing T cells                                                                                                                                                                                                                                                          | N |
| Hubeau 2006; mouse; OVA <sup>20</sup>         | BAL lung immune cells                 | BAL stain and cell count             | PD 5; aerosol challenged in each of the 3 days prior to mating                | Higher total cells count in BAL (~4.4 fold), and higher eosinophils (~13 fold) in asthmatic mothers not a recipient of DO11.1 T cells. No differences were seen in asthmatic mothers that were recipients. No differences observed for macrophages numbers, or lymphocytes in asthmatic mothers with or without the donor cells. | Y |
| Hubeau 2006; mouse; OVA <sup>20</sup>         | Serum cytokines                       | Immunoassay                          | PD 5; aerosol challenged in each of the 3 days prior to mating                | In asthmatic group that received DO11.1 T cells, higher concentration of: IFN- $\gamma$ (~3.7 fold), IL-10 (~2.3 fold), IL-4 (~27 fold), and IL-13 (~2.7 fold)                                                                                                                                                                   | N |
| Leme 2006; mouse; OVA <sup>23</sup>           | Breast milk cytokines                 | ELISA & flow cytometry               | PD 8-9; maternal challenges were week 4, 8, and 12 before mating              | No differences in concentration of IFN- $\gamma$ , IL-2, IL-4, IL-5, TNF- $\alpha$ , and IL-13 in breast milk, or offspring stomach, including no mRNA expression for IL4, IL-5, and IL-13                                                                                                                                       | N |
| Lenz 2019; rat; OVA <sup>24</sup>             | Serum IgE concentration               | ELISA                                | GD 15; blood collected 30 mins after allergen challenge                       | Higher IgE concentration (~17 fold)                                                                                                                                                                                                                                                                                              | N |
| Lopez-Exposito 2015; mouse; OVA <sup>25</sup> | Lung inflammation & immune cells      | BALF cell count & stain              | Protocol day 59; maternal challenges on protocol days 14, 21, 28, 56, and 57  | Increased peribronchial and perivascular inflammation; higher percentage of eosinophils (~35 fold)                                                                                                                                                                                                                               | Y |
| Matson 2010; mouse; OVA <sup>28</sup>         | Immunoglobulins and cytokines         | ELISA                                | 24 hours after the first aerosol challenge (5-6 weeks)                        | No differences in IL-5, OVA-IgG1, OVA-IgE                                                                                                                                                                                                                                                                                        | N |
| Matson 2010; mouse; OVA <sup>28</sup>         | Maternal lung immune response         | BAL stain & count and flow cytometry | 24 hours after the first aerosol challenge (5-6 weeks)                        | No differences in eosinophils, CD4+, IL-33R+, CD8+ and OVA Tetramer lymphocytes                                                                                                                                                                                                                                                  | N |

|                                                      |                                       |                                      |                                                              |                                                                                                                                                                                                                                                                                                                                                                                                                                                                                                                                                                                     |   |
|------------------------------------------------------|---------------------------------------|--------------------------------------|--------------------------------------------------------------|-------------------------------------------------------------------------------------------------------------------------------------------------------------------------------------------------------------------------------------------------------------------------------------------------------------------------------------------------------------------------------------------------------------------------------------------------------------------------------------------------------------------------------------------------------------------------------------|---|
| Schwartzter 2015;<br>mouse; OVA <sup>34</sup>        | BAL and serum<br>cytokines            | Multiplexing<br>bead<br>immunoassays | GD 17.5; BAL collected 4 hours<br>after challenge on GD 17.5 | BAL<br>Higher concentration of IL-4 (~47 fold), IL-5 (~28 fold),<br>IL-6 (~171 fold), IP-10 (~16 fold), MIP-1 $\alpha$ (~5.3 fold), and<br>TNF- $\alpha$ (~9 fold). No difference in IL-1 $\beta$ , IL-2, IL-7, IL-10,<br>IL-12 (p40), or IL-13.<br><br>Serum<br>Higher concentration of IL-4 (~4 fold), IL-5 (~12 fold), IL-<br>10 (~8.7 fold), and IP-10 (~1.3 fold). No difference in IL-<br>1 $\beta$ , IL-2, IL-6, IL-7, IL-10, IL-12 (p40), IL-13, MIP-1 $\alpha$ , and<br>TNF- $\alpha$                                                                                      | Y |
| Schwartzter 2017;<br>mouse; OVA <sup>35</sup>        | Serum cytokines                       | Immunoassay                          | GD 17.5; collected 4 hours after<br>challenge on GD 17.5     | C57 strain<br>Higher concentration of IL-4 (>10 fold), IL-5 (~13 fold),<br>IFN- $\gamma$ (~7.1 fold), IL-2 (>40 fold), IL-6 (~27 fold), IL-1 $\beta$<br>(~12 fold), and IL-17 (~10 fold) but no difference in IL-13<br>or TNF- $\alpha$<br><br>FVB/Ant strain<br>Higher concentration of IL-4 (>10 fold), IL-5 (~40 fold),<br>and IFN $\gamma$ (~2.9 fold). IL-13 was lower (~0.75 fold) but no<br>difference for IL-2, IL-6, IL-1b, TNFa and IL-17                                                                                                                                 | N |
| Sodemann 2020;<br>mouse; OVA or<br>CAS <sup>36</sup> | Asn-297 IgG antibody<br>glycosylation | Nano-liquid<br>chromatograph<br>y    | PD 134; maternal allergen recall<br>challenge on PD 131-133  | CAS induced maternal asthma and offspring challenged<br>with OVA: no difference in IgG1 with G0, G1S1, or G2S1<br>glycosylation, but lower for G3S1 (~0.5 fold) and G2S2<br>(~0.4 fold). No differences to IgG3 G0, G1S1, or G2S1<br>glycosylation.<br><br>OVA induced maternal asthma and offspring challenged<br>with OVA: no difference for Ig1 with G0 glycosylation<br>but lower for G1S1 (~0.35 fold), G2S1 (~0.23 fold), G3S1<br>(~0.29 fold), G2S2 glycosylation (~0.17 fold). No<br>difference in IgG3 G0 glycosylation, but lower for G1S1<br>(~ fold) and G2S1 (~ fold). | N |
| Sodemann 2020;<br>mouse; OVA or<br>CAS <sup>36</sup> | Lung inflammation &<br>immune cells   | BAL cell stain &<br>count            | PD 134; maternal allergen recall<br>challenge on PD 131-133  | In offspring of CAS induced asthmatic mothers:<br>Higher concentration of leucocytes (~15 fold),<br>eosinophils (>14 fold), lymphocytes (~9 fold), and lung                                                                                                                                                                                                                                                                                                                                                                                                                         | Y |

|                                                |                          |                                     |                                                                                                              |                                                                                                                                                                                                                                                                                 |   |
|------------------------------------------------|--------------------------|-------------------------------------|--------------------------------------------------------------------------------------------------------------|---------------------------------------------------------------------------------------------------------------------------------------------------------------------------------------------------------------------------------------------------------------------------------|---|
|                                                |                          |                                     |                                                                                                              | inflammation (~7 fold). No difference in macrophages<br><br>In offspring of OVA induced asthmatic mothers: Higher concentration of leucocytes (~14 fold), eosinophils (>12 fold), lymphocytes (~8 fold), and lung inflammation (~5 fold). No difference in macrophages          |   |
| Sodemann 2020; mouse; OVA or CAS <sup>36</sup> | Serum immunoglobulins    | ELISA                               | PD 134; maternal allergen recall challenge on PD 131-133                                                     | In CAS induced asthma, no differences in OVA-IgG1 or OVA-IgE but higher concentration of CAS-IgG1 (~36 fold) and CAS-IgE (~9 fold). No differences in CAS-IgG1 and CAS-IgE.<br><br>In OVA induced asthma, higher concentration of OVA-IgG1 (>4500 fold) and OVA-IgE (~40 fold). | N |
| Tamayo 2022; mouse; OVA <sup>37</sup>          | Maternal Serum Cytokines | Multiplex bead immunoassay          | GD 17.5; 4 hours after challenge on GD 17.5                                                                  | Higher concentration of IL-4 (~1.9 fold), IL-5 (~4 fold), IL-13 (~2 fold), IL-6 (~5 fold), IL-12 (p40) (~6 fold), IL-17 (~2 fold), and MIP1 $\alpha$ (~3 fold)                                                                                                                  | N |
| Wooldridge 2019; sheep; HDM <sup>39</sup>      | Amniotic cytokines       | ELISA                               | GD 140 $\pm$ 1; 17 $\pm$ 1 day after late pregnancy allergen challenge                                       | No differences for amniotic cytokines: IL-6, IL-10, IL-13, or TNF- $\alpha$                                                                                                                                                                                                     | N |
| Wooldridge 2019; sheep; HDM <sup>39</sup>      | Maternal cytokines       | ELISA                               | GD 140 $\pm$ 1; 17 $\pm$ 1 day after late pregnancy allergen challenge                                       | No differences in allergen-specific (house dust mite) total Ig, IgE, IgA or IgM                                                                                                                                                                                                 | N |
| Wu 2011; rat; OVA <sup>40</sup>                | Lung immune cells        | BALF cell stain & count             | 24 hours after the last OVA challenge; no offspring challenges. Maternal challenges were daily from GD 14-21 | Higher total cell count (~2.3 fold), eosinophils (~3.2 fold) and neutrophils (~6.7 fold)                                                                                                                                                                                        | Y |
| Other (non-lung) organ outcomes                |                          |                                     |                                                                                                              |                                                                                                                                                                                                                                                                                 |   |
| Abdala-Valencia 2014; mouse; OVA <sup>2</sup>  | Liver $\alpha$ -T        | High-pressure liquid chromatography | GD 18; challenged before mating but not during pregnancy                                                     | No differences                                                                                                                                                                                                                                                                  | N |
| Abdala-Valencia 2016; mouse; OVA <sup>3</sup>  | Liver $\gamma$ -T        | High pressure liquid chromatography | GD 18; challenged before mating but not during pregnancy                                                     | No differences                                                                                                                                                                                                                                                                  | N |

|                                         |                                                                             |                                                 |                                                                                                                                |                                                                                                                                                                                                                           |   |
|-----------------------------------------|-----------------------------------------------------------------------------|-------------------------------------------------|--------------------------------------------------------------------------------------------------------------------------------|---------------------------------------------------------------------------------------------------------------------------------------------------------------------------------------------------------------------------|---|
|                                         |                                                                             | y                                               |                                                                                                                                |                                                                                                                                                                                                                           |   |
| Wu 2011; rat; OVA <sup>40</sup>         | Histopathology examination of maternal adrenal medulla                      | Electron microscopy                             | 24 hours after the last OVA challenge; no offspring challenges, maternal challenges were daily from GD 14-21                   | Vacuolar degeneration and lipid increases. Mitochondrion swelled, lipid increased and chromaffin granules decreased. Lesions were alleviated and appeared more collagen tissue, which divided adrenal medulla into island | N |
| Wu 2011; rat; OVA <sup>40</sup>         | The expression of nerve growth factor in adrenal medulla                    | ELISA                                           | <i>Unclear</i> ; no offspring challenges, maternal challenges were daily from GD 14-21                                         | Higher protein expression (~1.8 fold)                                                                                                                                                                                     | N |
| Wu 2011; rat; OVA <sup>40</sup>         | The expression of phenylethanolamine N-methyltransferase in adrenal medulla | Immunohistochemistry                            | <i>Unclear</i> ; no offspring challenges, maternal challenges were daily from GD 14-21                                         | No differences                                                                                                                                                                                                            | N |
| Respiratory outcomes                    |                                                                             |                                                 |                                                                                                                                |                                                                                                                                                                                                                           |   |
| Babayigit 2008; mouse; OVA <sup>6</sup> | Histopathological lung parameters                                           | Electron microscopy                             | PD 1; final challenge was GD 18                                                                                                | Increased basement membrane thickness (~1.5 fold), epithelium thickness (~1.2 fold) and subepithelial smooth muscle thickness (~1.5 fold)                                                                                 | Y |
| Clifton 2016; sheep; HDM <sup>10</sup>  | Baseline lung resistance                                                    | Intra and extrathoracic pressures via catheters | pre-mating, at mid-pregnancy (GD 50-65) and in late pregnancy (GD 118-132); prior to (0 h) and after (48 h) aerosol challenges | Lung resistance higher in late pregnancy (~1.8 fold) and increased in mid-late pregnancy compared to early pregnancy (~1.1 fold)                                                                                          | Y |
| Clifton 2016; sheep; HDM <sup>10</sup>  | Lung histological analysis                                                  | morphometric image analysis                     | late pregnancy; 17 ± 1 day after late pregnancy allergen challenge                                                             | No differences in granulated mast cells. More smooth muscle accumulation around airways (~1.7 fold)                                                                                                                       | Y |
| Hamada 2003; mouse; OVA <sup>17</sup>   | Airway responsiveness                                                       | Methacholine challenge                          | 4 weeks (data at 8, 12, and 2 weeks postnatal not shown); after allergen aerosols at weeks 4 (also given weeks 8 and 12)       | Higher airway hyperresponsiveness at 12, 25, 50, 100 mg/ml methacholine (~2-7 fold)                                                                                                                                       | Y |
| Hubeau 2006; mouse; OVA <sup>20</sup>   | Airway responsiveness                                                       | Methacholine challenge                          | PD 5; after OVA sensitisation injection on day 4 but before challenged                                                         | No difference in asthmatic mothers who received DO11.1 T cells, but higher airway hyperresponsiveness in non-recipient asthmatic mothers at 6, 12, 25, 50, and 100 mg/ml methacholine (~2-3 fold)                         | Y |

|                                               |                                             |                         |                                                                                                              |                                                                                           |   |
|-----------------------------------------------|---------------------------------------------|-------------------------|--------------------------------------------------------------------------------------------------------------|-------------------------------------------------------------------------------------------|---|
| Lopez-Exposito 2015; mouse; OVA <sup>25</sup> | Airway hyper-responsiveness                 | Acetylcholine challenge | Protocol day 59; maternal challenges on protocol days 14, 21, 28, 56, and 57                                 | Airway hyperresponsiveness higher (~4.2 fold)                                             | Y |
| Wu 2011; rat; OVA <sup>40</sup>               | Airway responsiveness to histamine          | Histamine challenge     | 24 hours after the last OVA challenge; no offspring challenges, maternal challenges were daily from GD 14-21 | Airway responsiveness higher at 0.08, 0.16, and 0.32 mg/ml histamine (~1.7-1.9 fold)      | Y |
| Wu 2011; rat; OVA <sup>40</sup>               | Histopathology examination of maternal lung | Electron microscopy     | 24 hours after the last OVA challenge; no offspring challenges, maternal challenges were daily from GD 14-21 | Bronchial epithelial shedding, eosinophil and neutrophils infiltration surrounding airway | Y |

BAL = bronchoalveolar lavage, CAS = casein, ELISA = enzyme-linked immunosorbent assay, GD = day of gestation, GM-CSF = Granulocyte-macrophage colony-stimulating factor, HDM = house dust mite, IFN = interferon, Ig = immunoglobulin, IL = interleukin, MIP = macrophage inflammatory protein, N = No, NGF = nerve growth factor, OVA = ovalbumin, PD = postnatal day, TNF = tumour necrosis factor, y = yes



Table S5 – Placental outcomes

| Study ID                               | Outcome name                             | Brief methods              | Pregnancy stage or age; timing of measurement                                                             | Findings in asthmatic animals (ref: controls)                                                                                                                                                                                                                                                                                                                                                                                                                                                                                                                                                                  | Sex-specific? |
|----------------------------------------|------------------------------------------|----------------------------|-----------------------------------------------------------------------------------------------------------|----------------------------------------------------------------------------------------------------------------------------------------------------------------------------------------------------------------------------------------------------------------------------------------------------------------------------------------------------------------------------------------------------------------------------------------------------------------------------------------------------------------------------------------------------------------------------------------------------------------|---------------|
| Immune outcomes                        |                                          |                            |                                                                                                           |                                                                                                                                                                                                                                                                                                                                                                                                                                                                                                                                                                                                                |               |
| Akkoc 2008; mouse; OVA <sup>4</sup>    | Cytokine levels of placental lymphocytes | ELISA                      | GD 18; OVA challenged every second day during pregnancy, unclear if measurement before or after challenge | In OVA and M. vaccae immunised group: lower OVA-specific IL-5 (~0.14 fold) and IL-5/IFN- $\gamma$ ratio (~0.7 fold)                                                                                                                                                                                                                                                                                                                                                                                                                                                                                            | No            |
| Tamayo 2022; mouse; OVA <sup>37</sup>  | Placental cytokines                      | Multiplex bead immunoassay | GD 17.5; 4 hours after maternal challenge on GD 17.5                                                      | In females, lower concentration of MCP-1 (~0.5 fold) and IL-17 (~0.8 fold)<br>In males, lower expression of IL-4 (~0.8 fold), IP-10 (~0.5 fold), RANTES (~0.4 fold), and IL-17 (~0.8 fold)                                                                                                                                                                                                                                                                                                                                                                                                                     | Yes           |
| Endocrine outcomes                     |                                          |                            |                                                                                                           |                                                                                                                                                                                                                                                                                                                                                                                                                                                                                                                                                                                                                |               |
| Clifton 2019; sheep; HDM <sup>11</sup> | Placental GR isoforms                    | Western blot               | GD 140 $\pm$ 1 days; 17 $\pm$ 1 day after late pregnancy allergen challenge                               | CYTOSOLIC fraction<br>Cot A: No differences for GR $\alpha$ -C1-3, GR-A, or GR $\alpha$ -D1<br>Cot B higher expression of GR $\gamma$ (~3 fold), GR $\alpha$ -A (~3 fold), and GR-P (~3.5 fold)<br>Cot D higher expression of GR-P (~3 fold) but no difference for GR $\alpha$ -A or GR- $\gamma$<br><br>NUCLEAR fraction<br>In Cot A: higher expression of GR $\alpha$ -C1-3 (~3 fold), GR-A (~2.2 fold), GR $\alpha$ -D1 (~1.2 fold)<br>In Cot B: higher expression of GR $\gamma$ (~2 fold) but no difference for GR $\alpha$ -A or GR-P<br>In Cot D: no differences for GR $\gamma$ , GR $\alpha$ -A, GR-P | No            |
| Meakin 2021; sheep; HDM <sup>29</sup>  | Placental AR isoform expression          | Western blot               | GD 140 $\pm$ 1 days; 17 $\pm$ 1 day after late pregnancy allergen challenge                               | Nuclear protein expression: AR-45 lower (~0.45 fold, Cots A-D)<br><br>Cytoplasmic protein expression: AR-v1 lower (~0.6 fold, Cots A-D)                                                                                                                                                                                                                                                                                                                                                                                                                                                                        | No            |

|                                        |                                               |                           |                                                                     |                                                                                                                                                                                                                                                                                                        |    |
|----------------------------------------|-----------------------------------------------|---------------------------|---------------------------------------------------------------------|--------------------------------------------------------------------------------------------------------------------------------------------------------------------------------------------------------------------------------------------------------------------------------------------------------|----|
|                                        |                                               |                           |                                                                     | Cot B: cytoplasmic AR-45 (~0.4 fold) and AR-FL (~0.3 fold) lower in asthma<br>Cot D: cytoplasmic AR-v1 lower in asthma (~0.6 fold)                                                                                                                                                                     |    |
| Meakin 2021; sheep; HDM <sup>29</sup>  | Placental AR isoform subcellular distribution | Western blot              | GD 140 ± 1 days; 17 ± 1 day after late pregnancy allergen challenge | In asthma group only, nuclear vs cytoplasmic:<br>AR-45: higher Cot C (~3 fold) and D (~5.5 fold)<br>AR-v7: lower in Cot A (~0.09 fold), B (~0.14 fold), C (~0.14 fold), and D (~0.22 fold)<br>AR-v1: lower in Cot A (~0.2 fold), B (~0.3 fold), and D (~0.3 fold)<br>AR-FL: lower in Cot A (~0.1 fold) | No |
| Anatomical outcomes                    |                                               |                           |                                                                     |                                                                                                                                                                                                                                                                                                        |    |
| Clifton 2016; sheep; HDM <sup>10</sup> | Placental weight and phenotype                | Placentome weighed/scored | GD 140 ± 1 days; 17 ± 1 day after late pregnancy allergen challenge | Higher proportion of Type B (~2 fold) and Type C (~2.2 fold) placentomes. Type A total weight was lower (~0.3 fold)                                                                                                                                                                                    | No |
| Clifton 2019; sheep; HDM <sup>11</sup> | Placenta weights                              | Weighing at postmortem    | GD 140 ± 1 days; 17 ± 1 day after late pregnancy allergen challenge | No difference in placental weight                                                                                                                                                                                                                                                                      | No |
| Clifton 2019; sheep; HDM <sup>11</sup> | Placental phenotypes                          | Placental phenotyping     | GD 140 ± 1 days; 17 ± 1 day after late pregnancy allergen challenge | Higher proportion of Type B (~2 fold) and Type C (~2.5 fold) placentomes                                                                                                                                                                                                                               | No |
| Clifton 2019; sheep; HDM <sup>11</sup> | Placental volume density                      | Placental histology       | GD 140 ± 1 days; 17 ± 1 day after late pregnancy allergen challenge | Lower placenta volumes of: trophoblasts (~0.8 fold), fetal connective tissue (~0.8 fold), maternal epithelium (~0.8 fold), maternal capillaries (~0.7 fold), and maternal connective tissue (~0.8 fold). No differences in volume density.                                                             | No |

AR = androgen receptor, cot = cotyledonary placenta, ELISA = enzyme-linked immunosorbent assay, GD = days of gestation, GR = glucocorticoid receptor, HDM = house dust mite, IFN = interferon, IL = interleukin, IP = induced protein, MCP = monocyte chemoattractant protein, OVA = ovalbumin, RANTES = regulated on activation normal T cell

---

expressed and secreted

Table S6 – Pregnancy and Fetal outcomes

| Study ID                                  | Outcome name                          | Brief methods                     | Pregnancy stage or age; timing of measurement                       | Findings in asthmatic animals (ref: controls)                                                                                                                                                                                                                                                                                                                   | Sex-specific? |
|-------------------------------------------|---------------------------------------|-----------------------------------|---------------------------------------------------------------------|-----------------------------------------------------------------------------------------------------------------------------------------------------------------------------------------------------------------------------------------------------------------------------------------------------------------------------------------------------------------|---------------|
| Endocrine outcomes                        |                                       |                                   |                                                                     |                                                                                                                                                                                                                                                                                                                                                                 |               |
| Wooldridge 2019; sheep; HDM <sup>39</sup> | Cortisol                              | ELISA                             | GD 140 ± 1; 17 ± 1 day after late pregnancy allergen challenge      | Lower maternal plasma cortisol (~0.26 fold) but not fetal                                                                                                                                                                                                                                                                                                       | No            |
| Genetic & epigenetic outcomes             |                                       |                                   |                                                                     |                                                                                                                                                                                                                                                                                                                                                                 |               |
| Clifton 2016; sheep; HDM <sup>10</sup>    | Lung gene expression                  | RNA extraction                    | GD 140 ± 1 days; 17 ± 1 day after late pregnancy allergen challenge | Fetal lung gene expression of surfactant protein B was reduced (~0.6 fold)                                                                                                                                                                                                                                                                                      | No            |
| Immune outcomes                           |                                       |                                   |                                                                     |                                                                                                                                                                                                                                                                                                                                                                 |               |
| Tamayo 2022; mouse; OVA <sup>37</sup>     | Whole-Brain Fetal Cytokines           | Multiplex bead immunoassay        | GD 17.5, 4 hours after maternal challenge                           | Higher in males and females: GM-CSF (~2-2.5 fold), IFN $\gamma$ (~1.7-2.3 fold), IL-1 $\alpha$ (~1.5-2.5 fold), IL-6 (~1.3-1.7 fold), TNFa (~4-5 fold)<br>Lower in males and females: IL-9 (~0.4 fold)<br>Lower in males only: IL-1 $\beta$ (~0.7 fold), IP-10 (~0.4 fold)<br>Higher in males only: MIP-2 (~1.3 fold)<br>Higher in females only: KC (~3.8 fold) | Yes           |
| Wooldridge 2019; sheep; HDM <sup>39</sup> | Fetal plasma cytokines                | ELISA                             | GD 140 ± 1; 17 ± 1 day after late pregnancy allergen challenge      | No differences in allergen-specific total Ig, IgE, IgA, or IgM                                                                                                                                                                                                                                                                                                  | No            |
| Wooldridge 2019; sheep; HDM <sup>39</sup> | Lung tissue immune cells              | Immunohistochemistry & cell count | GD 140 ± 1; 17 ± 1 day after late pregnancy allergen challenge      | No difference in CD45+ Leucocytes or CD163+ macrophages                                                                                                                                                                                                                                                                                                         | No            |
| Wooldridge 2019; sheep; HDM <sup>39</sup> | Thymus and spleen tissue immune cells | Flow cytometry                    | GD 140 ± 1; 17 ± 1 day after late pregnancy allergen challenge      | CD44+ lymphocytes (%) were higher (~4 fold)                                                                                                                                                                                                                                                                                                                     | No            |

| Respiratory outcomes                          |                                      |                               |                                                                    |                                                                                                                                                            |     |
|-----------------------------------------------|--------------------------------------|-------------------------------|--------------------------------------------------------------------|------------------------------------------------------------------------------------------------------------------------------------------------------------|-----|
| Wooldridge 2019; sheep; HDM <sup>39</sup>     | Lung structure histology             | Histological image analysis   | GD 140 ± 1; 17 ± 1 day after late pregnancy allergen challenge     | Lung tissue to airspace ratio: no difference<br>Density of surfactant protein C positive type II epithelial cells was lower (~0.7 fold)                    | No  |
| Size outcomes                                 |                                      |                               |                                                                    |                                                                                                                                                            |     |
| Abdala-Valencia 2014; mouse; OVA <sup>2</sup> | Pup body weight                      | Weight at post-mortem         | PD 13; 24 hours after pups challenged days 10-12                   | No differences based on maternal or offspring OVA challenges, basal diet, or different doses of α-T diet (150, 250, or 500mg)                              | No  |
| Abdala-Valencia 2016; mouse; OVA <sup>3</sup> | Pup body weight                      | Weight at post-mortem         | PD 13; pups challenged days 10-12                                  | No differences in number of pups, litter size or weight based on asthma status or diet alone.                                                              | No  |
| Allina 2011; mouse; OVA <sup>5</sup>          | Pup bodyweight                       | Delivery records and weighing | PD 7; maternal challenges all pre-mating, no offspring challenges  | No differences in mass/pup/litter, average litter size, percentage of male to female pups or treatment interaction                                         | Yes |
| Clifton 2016; sheep; HDM <sup>10</sup>        | Fetal weight (absolute and relative) | Weighing at delivery          | GD 140 ± 1 day; 17 ± 1 day after late pregnancy allergen challenge | Lower fetal:maternal weight ratio (~0.8 fold)                                                                                                              | No  |
| Clifton 2019; sheep; HDM <sup>11</sup>        | Body weights                         | Weight at post-mortem         | GD 140 ± 1 day; 17 ± 1 day after late pregnancy allergen challenge | No differences for: maternal weight, gestational age, or fetal weight<br>Lower fetal:maternal weight ratio (~0.8 fold)                                     | No  |
| Wooldridge 2019; sheep; HDM <sup>39</sup>     | Body and organ weights               | Weight at postmortem          | GD 140 ± 1; 17 ± 1 day after late pregnancy allergen challenge     | No differences absolute or relative weights: ewe body weight, fetal lungs, fetal spleen, and fetal thymus<br>Lower fetal:maternal weight ratio (~0.8 fold) | No  |
| Survival outcomes                             |                                      |                               |                                                                    |                                                                                                                                                            |     |

|                                                                                                                                                                                                                                                                                                                                                                                                                             |                               |                          |                                                                                                                     |                                                                                                                                               |     |
|-----------------------------------------------------------------------------------------------------------------------------------------------------------------------------------------------------------------------------------------------------------------------------------------------------------------------------------------------------------------------------------------------------------------------------|-------------------------------|--------------------------|---------------------------------------------------------------------------------------------------------------------|-----------------------------------------------------------------------------------------------------------------------------------------------|-----|
| Abdala-Valencia 2016; mouse; OVA <sup>3</sup>                                                                                                                                                                                                                                                                                                                                                                               | Pup viability                 | Weight at post-mortem    | PD 13; pups challenged days 10-12                                                                                   | Only in asthmatic mothers fed 250 mg $\gamma$ -T were there fewer pups (~0.5 fold)                                                            | No  |
| Allina 2011; mouse; OVA <sup>5</sup>                                                                                                                                                                                                                                                                                                                                                                                        | Pup litter size               | Delivery records         | PD 7; maternal challenges all pre-mating, no offspring challenges                                                   | No differences average litter size or effect of sex                                                                                           | Yes |
| Pucheu-Haston 2009; mouse; <i>Metarhizium anisopliae</i> fungus <sup>31</sup>                                                                                                                                                                                                                                                                                                                                               | Pup viability and litter size | Implantation sites count | PD 51-59; one group had pre-breeding challenges only; another had 3 post-breeding challenges to mimic exacerbation  | No differences in percentage of successful pregnancies, or viable pups per litter                                                             | No  |
| Pucheu-Haston 2010; mouse; <i>Metarhizium anisopliae</i> fungus <sup>32</sup>                                                                                                                                                                                                                                                                                                                                               | Pup viability and litter size | Implantation sites count | GD 21; some mothers only received pre-mating challenges and others had gestational challenges on days 11, 15 and 19 | No differences in percentage of successful pregnancies or viable pups per litter dependent on number of allergen exposure or type of allergen | No  |
| BAL = bronchoalveolar lavage, CAS = casein, ELISA = enzyme-linked immunosorbent assay, GD = day of gestation, GM-CSF = Granulocyte-macrophage colony-stimulating factor, HDM = house dust mite, IFN = interferon, Ig = immunoglobulin, IL = interleukin, IP = induced protein, KC = keratinocyte derived cytokine, MIP = macrophage inflammatory protein, OVA = ovalbumin, PD = postnatal day, TNF = tumour necrosis factor |                               |                          |                                                                                                                     |                                                                                                                                               |     |

Table S7 – Postnatal progeny outcomes

| Study ID                                | Outcome name                         | Brief methods                       | Pregnancy stage or age; timing of measurement                             | Findings in asthmatic animals (ref: controls)                                                                                                                                                                                                                                                                                                                                                                                                           | Sex specific ? |
|-----------------------------------------|--------------------------------------|-------------------------------------|---------------------------------------------------------------------------|---------------------------------------------------------------------------------------------------------------------------------------------------------------------------------------------------------------------------------------------------------------------------------------------------------------------------------------------------------------------------------------------------------------------------------------------------------|----------------|
| Behavioural outcomes                    |                                      |                                     |                                                                           |                                                                                                                                                                                                                                                                                                                                                                                                                                                         |                |
| Church 2021; mouse; OVA <sup>9</sup>    | Anxiety behaviours                   | Elevated plus maze & marble burying | 8 weeks; offspring not postnatally challenged                             | <p>In early and late OVA-challenge, results were comparable.</p> <p>In males, time in open arm was lower (~0.7 fold), time in closed arm higher (~1.5 fold), percentage exploration was lower (~0.7 fold) and marble burying was higher (~4-6 fold) in early challenge (GD2-9) but not different in late challenge (GD10-17).</p> <p>In females, there was no difference for time in open or closed arm, percentage exploration, or marble burying.</p> | Yes            |
| Church 2021; mouse; OVA <sup>9</sup>    | Locomotor & social activity          | Video & score                       | PD 21; offspring not postnatally challenged                               | No differences in locomotor activity, social sniff, body contact, or approach                                                                                                                                                                                                                                                                                                                                                                           | Yes            |
| Lenz 2019; rat; OVA <sup>24</sup>       | Female preference                    | Olfactory preference test           | PD 60; offspring not challenged, last maternal challenge was GD 15        | In males, there was a lower female preference (~0.35 in controls but -0.02 in OVA group) but no difference in female mice                                                                                                                                                                                                                                                                                                                               | Yes            |
| Lenz 2019; rat; OVA <sup>24</sup>       | Male typical reproductive behaviours | Sexual behaviour testing            | PD 60-80; offspring not challenged, last maternal challenge was GD 15     | In males, no difference in latency to mount or mount rate. In females, latency to mount was lower (~0.4 fold) and mount rate was higher (~6 fold)                                                                                                                                                                                                                                                                                                       | Yes            |
| Schwartz 2015; mouse; OVA <sup>34</sup> | Anxiety-like behavior                | Elevated plus maze                  | Week 8; offspring not challenged. Final challenge was maternal on GD 17.5 | No differences in time in open arm, entries into open arm, or total entries. No sex effects                                                                                                                                                                                                                                                                                                                                                             | Yes            |
| Schwartz 2015;                          | Learning & memory                    | Novel object                        | Week 10; offspring not challenged. Final challenge                        | No difference. No sex effects                                                                                                                                                                                                                                                                                                                                                                                                                           | Yes            |

|                                                     |                                                     |                                          |                                                                                                                |                                                                                                                                                                                                                                                                         |     |
|-----------------------------------------------------|-----------------------------------------------------|------------------------------------------|----------------------------------------------------------------------------------------------------------------|-------------------------------------------------------------------------------------------------------------------------------------------------------------------------------------------------------------------------------------------------------------------------|-----|
| mouse;<br>OVA <sup>34</sup>                         |                                                     | recognition                              | was maternal on GD 17.5                                                                                        |                                                                                                                                                                                                                                                                         |     |
| Schwartzter<br>2015;<br>mouse;<br>OVA <sup>34</sup> | Locomotor activity                                  | Arena exploration                        | Week 10; offspring not challenged. Final challenge was maternal on GD 17.5                                     | Distance travelled: no difference. Average velocity: no difference. No sex effects                                                                                                                                                                                      | Yes |
| Schwartzter<br>2015;<br>mouse;<br>OVA <sup>34</sup> | Repetitive behaviours (marble burying and grooming) | Video score & number of marbles buried   | 9 weeks + 10 weeks; offspring not challenged. Final challenge was maternal on GD 17.5                          | In offspring of asthmatic mothers, marble burying was higher (~1.6 fold), and grooming was lower than offspring of controls (~0.8 fold). Males had a higher burying rate and spent more time grooming than females                                                      | Yes |
| Schwartzter<br>2015;<br>mouse;<br>OVA <sup>34</sup> | Social behaviour                                    | Social approach and dominance tube tests | Cohort 1: week 8 and Cohort 2: week 9<br><br>Offspring not challenged. Final challenge was maternal on GD 17.5 | Sociability score: lower (~0.7 fold). Chamber exploration no difference for reduced time with novel mouse but increased time with novel object (~1.4 fold). Social dominance: no differences. No sex effects.                                                           | Yes |
| Schwartzter<br>2017;<br>mouse;<br>OVA <sup>35</sup> | Anxiety-like behaviours                             | Elevated plus-maze & open field          | 8 weeks; offspring not challenged. Final challenge was maternal on day 17.5 of gestation                       | In C57 mice, no differences in percentage time in open arms of the maze or in the centre of the open field area. In FVB/Ant mice, the percentage time spent in open arms was not different, but higher percentage of time in the centre of the open field (~1.05 fold). | No  |
| Schwartzter<br>2017;<br>mouse;<br>OVA <sup>35</sup> | Locomotor behaviour                                 | Horizontal locomotor activity            | 8 weeks; offspring not challenged. Final challenge was maternal on day 17.5 of gestation                       | In C57 mice, there was no difference in velocity or distance travelled. In FVB/Ant mice, the velocity was higher (~1.1 fold) but no difference in distance travelled.                                                                                                   | No  |
| Schwartzter<br>2017;<br>mouse;<br>OVA <sup>35</sup> | Repetitive behaviours (marble burying and grooming) | Video score & number of marbles buried   | 8 weeks; offspring not challenged. Final challenge was maternal on day 17.5 of gestation                       | Results were consistent in both strains of mice (C57 mice and FVB/Ant), less grooming behaviour (~0.6-0.7 fold) and higher percentage of marbles buried (~1.7 fold). No sex differences.                                                                                | Yes |



|                                            |                                                                           |                                    |                                                                                                          |                                                                                                                                                                                                                                                                                                                                                                                                                                                                                                                                                                                                                         |     |
|--------------------------------------------|---------------------------------------------------------------------------|------------------------------------|----------------------------------------------------------------------------------------------------------|-------------------------------------------------------------------------------------------------------------------------------------------------------------------------------------------------------------------------------------------------------------------------------------------------------------------------------------------------------------------------------------------------------------------------------------------------------------------------------------------------------------------------------------------------------------------------------------------------------------------------|-----|
| Schwartzner 2017; mouse; OVA <sup>35</sup> | Social interactions                                                       | Reciprocal social interaction task | PD 21; offspring not challenged. Final challenge was maternal on day 17.5 of gestation                   | In C57 mice, lower total social time (~0.8 fold) and body sniff (~0.7 fold) but no difference in following behaviours. No sex differences<br><br>In FVB/Ant mice, total social time (~2 fold) and body sniff were higher (~2.6 fold), but no difference in following behaviour. No sex differences                                                                                                                                                                                                                                                                                                                      | Yes |
| Endocrine outcomes                         |                                                                           |                                    |                                                                                                          |                                                                                                                                                                                                                                                                                                                                                                                                                                                                                                                                                                                                                         |     |
| Allina 2011; mouse; OVA <sup>5</sup>       | Hepatic fibrosis-related mRNA expression                                  | RT-qPCR                            | 8 weeks postnatal; maternal challenges all prenatally, no offspring challenges                           | Results in mice exposed to air and cigarette smoke were the same.<br><br>In male offspring of asthmatic mothers compared to smoke exposed offspring of non-asthmatic mothers, higher mRNA expression of Collagen 1A1 (~2 fold). In air exposed mice, offspring of asthmatic mothers compared to controls had reduced expression of platelet-derived growth factor receptor- $\beta$ (~0.08 fold).<br><br>In females, no difference in expression of Collagen 1A1 and in smoke exposed offspring, reduced expression of platelet-derived growth factor receptor- $\beta$ in offspring of asthmatic mothers (~0.17 fold). | Yes |
| Fedulov 2011; mouse; OVA <sup>14</sup>     | Genotype profiling of splenic dendritic cells                             | Flow cytometry                     | PD 14; offspring challenged at 13-15 days with suboptimal protocol                                       | No reproducible genotype differences.                                                                                                                                                                                                                                                                                                                                                                                                                                                                                                                                                                                   | No  |
| Fedulov 2011; mouse; OVA <sup>14</sup>     | Whole genome epigenomic differences                                       | Genome-wide assay                  | PD 14; offspring challenged at 13-15 days with suboptimal protocol                                       | Cytosine-phosphate-guanosine island and other locations differentially methylated - 40 different sites very different. Each sample in the asthma-susceptible group had a higher level of methylation. Fold change varied from 8.9 to 716.7.                                                                                                                                                                                                                                                                                                                                                                             | No  |
| Feng 2012; rat; OVA <sup>15</sup>          | Serum epinephrine, corticosterone, and nerve growth factor concentrations | ELISA                              | <i>Unclear</i> ; offspring protocol began 6-8 weeks, with daily aerosol challenge on protocol days 14-21 | Epinephrine: lower (~0.9 fold)<br>Corticosterone: no difference<br>Nerve growth factor: higher (~1.1 fold)                                                                                                                                                                                                                                                                                                                                                                                                                                                                                                              | No  |

| Genetic & epigenetic outcomes                |                                                                                              |                                                 |                                                                                           |                                                                                                                                                                                                                                                                                                                                                                                                                                                                                                                                                                                                                                                                                                                                                                                                                                                                           |             |
|----------------------------------------------|----------------------------------------------------------------------------------------------|-------------------------------------------------|-------------------------------------------------------------------------------------------|---------------------------------------------------------------------------------------------------------------------------------------------------------------------------------------------------------------------------------------------------------------------------------------------------------------------------------------------------------------------------------------------------------------------------------------------------------------------------------------------------------------------------------------------------------------------------------------------------------------------------------------------------------------------------------------------------------------------------------------------------------------------------------------------------------------------------------------------------------------------------|-------------|
| Pulczinski 2021; mouse; HDM <sup>33</sup>    | mRNA expression of airway hyperresponsive phenotypic genes in different generation progenies | RT-qPCR                                         | 6 weeks + 23 days; offspring challenge (all generations) on 6 weeks + 14, 18, and 21 days | <p>FIRST GENERATION</p> <p>No differences for first generation allergen-challenged offspring of asthmatic mothers: Ccnd1, Pcna, Col1a, Col3a, Muc5b, Sma, Camk2d, Mylk, Dnmt1, Dnmt3a, Dnmt3b, Mecp2, Tet1, Tet2, Dpy19 1, Lars2, Nron, and Oasl2. Lower expression of Erdr1 (~0.26 fold), but higher expression of Kcni1 (~1.9 fold) and Spag17 (~1.8 fold).</p> <p>SECOND GENERATION</p> <p>No differences for second generation offspring of challenged generation 0 and 1: Ccnd1, Pcna, Col1a, Muc5b, Sma, Camk2d, Mylk. Higher expression of Col3a (~2.1 fold) and Kcni1 (~1.5 fold) but no difference in Spag17.</p> <p>THIRD GENERATION</p> <p>No differences for third generation offspring of challenged generation 0 and 1: Ccnd1, Pcna, Col1a, Col3a, Muc5b, Sma, Camk2d, and Mylk. Higher concentration of Kcni1 (~1.3 fold) but no difference in Spag17.</p> | Male only   |
| Schwartzter 2015; mouse; OVA <sup>34</sup>   | Serotonin transporter in cortex                                                              | Immunoblot analysis                             | Week 11; offspring not challenged. Final challenge was maternal on GD 17.5                | Protein expression of serotonin transporter was greater (~1.3 fold). No sex differences                                                                                                                                                                                                                                                                                                                                                                                                                                                                                                                                                                                                                                                                                                                                                                                   | Yes         |
| Vogel Ciernia 2018; mouse; OVA <sup>38</sup> | Differentially expressed genes in microglial isolations                                      | RNA sequencing differential expression analysis | PD 35; offspring not challenged. Final challenge was maternal on GD 17.5                  | 162 differentially expressed genes. 157 asthma > control, with Hspalb concentration reaching significance                                                                                                                                                                                                                                                                                                                                                                                                                                                                                                                                                                                                                                                                                                                                                                 | Female only |
| Vogel Ciernia 2018; mouse;                   | Differentially methylated regions in microglia                                               | Whole genome bisulfite sequencing and RT-qPCR   | PD 35; offspring not challenged. Final challenge was maternal on GD 17.5                  | Hypomethylated genes in control group: (558 control > asthma) including zinc finger and LIM homeobox protein. Hypermethylated genes in the asthma group (626 asthma > control) including RUNX1, PU.1, IRF8, NF-κB,                                                                                                                                                                                                                                                                                                                                                                                                                                                                                                                                                                                                                                                        | Female only |

|                                               |                                                  |                                               |                                                                                            |                                                                                                                                                                                                                                                                                                |             |
|-----------------------------------------------|--------------------------------------------------|-----------------------------------------------|--------------------------------------------------------------------------------------------|------------------------------------------------------------------------------------------------------------------------------------------------------------------------------------------------------------------------------------------------------------------------------------------------|-------------|
| OVA <sup>38</sup>                             |                                                  |                                               |                                                                                            | and MAFB                                                                                                                                                                                                                                                                                       |             |
| Vogel Ciernia 2018; mouse; OVA <sup>38</sup>  | Microglial methylome and transcriptome           | Whole genome bisulfite sequencing and RT-qPCR | PD 35; offspring not challenged. Final challenge was maternal on GD 17.5                   | No significant differences in sequencing coverage, bisulfite conversion, or in the global percentage of CG, CHG, or CHH methylation. Microglia showed similar concentration of mCG and mCH                                                                                                     | Female only |
| Wu 2011; rat; OVA <sup>40</sup>               | Serum corticosterone                             | ELISA                                         | PD 3, 7, 14, 30, 60; no offspring challenges, maternal challenges were daily from GD 14-21 | Higher concentrations from PD 3 to 60 (~1.2-1.6 fold)                                                                                                                                                                                                                                          | Male only   |
| Wu 2011; rat; OVA <sup>40</sup>               | Serum epinephrine                                | ELISA                                         | PD 3, 7, 14, 30, 60; no offspring challenges, maternal challenges were daily from GD 14-21 | Lower concentrations from PD 3 to 14 (~0.5-0.8 fold)                                                                                                                                                                                                                                           | Male only   |
| Wu 2011; rat; OVA <sup>40</sup>               | Serum nerve growth factor concentration          | ELISA                                         | PD 3, 7, 14, 30, 60; no offspring challenges, maternal challenges were daily from GD 14-21 | Overall concentration higher at days 3-7 (~1.6-2.0 fold)                                                                                                                                                                                                                                       | Male only   |
| Immune outcomes                               |                                                  |                                               |                                                                                            |                                                                                                                                                                                                                                                                                                |             |
| Abdala-Valencia 2014; mouse; OVA <sup>2</sup> | BAL immune cells (2nd pregnancy, switched diets) | BAL stain and cell count                      | PD 13; 24 hours after pups challenged days 10-12                                           | Asthmatic, basal diet compared to saline basal diet: higher numbers of eosinophils (~60 fold), monocytes (~2 fold), lymphocytes (~10 fold), and neutrophils (~12.5 fold)<br><br>Asthmatic mice switched onto 500mg $\alpha$ -T (from basal diet) compared to saline basal diet: no differences | No          |

|                                                     |                                                                                                |                                 |                                                         |                                                                                                                                                                                                                                                                                                                                                                                                                                                                                                                                                                                                                                                                                                                                                                                                                                                                                                                                                                                                                                                             |           |
|-----------------------------------------------------|------------------------------------------------------------------------------------------------|---------------------------------|---------------------------------------------------------|-------------------------------------------------------------------------------------------------------------------------------------------------------------------------------------------------------------------------------------------------------------------------------------------------------------------------------------------------------------------------------------------------------------------------------------------------------------------------------------------------------------------------------------------------------------------------------------------------------------------------------------------------------------------------------------------------------------------------------------------------------------------------------------------------------------------------------------------------------------------------------------------------------------------------------------------------------------------------------------------------------------------------------------------------------------|-----------|
| <p>Abdala-Valencia 2014; mouse; OVA<sup>2</sup></p> | <p>BAL immune cells (cross fostering)</p>                                                      | <p>BAL stain and cell count</p> | <p>PD 13; 24 hours after pups challenged days 10-12</p> | <p>Saline basal diet pups:</p> <p>1) fostered on OVA basal: higher monocytes (~2 fold) than saline groups but no differences in eosinophils, lymphocytes and neutrophils</p> <p>2) fostered on OVA 250 <math>\alpha</math>T: no differences</p> <p>Asthmatic mother basal diet pups:</p> <p>1) kept on mum: higher eosinophils (~22 fold), monocytes (~6 fold), lymphocytes (~11 fold), and neutrophils (~14 fold)</p> <p>2) fostered on saline basal: no differences</p> <p>3) Fostered on OVA 250 <math>\alpha</math>T: higher eosinophils (~2 fold) and monocytes (~3.5 fold) than saline groups but no differences in lymphocytes and neutrophils</p> <p>Asthma and 250 <math>\alpha</math>T diet pups:</p> <p>1) kept on mum: higher eosinophils (~4 fold) and monocytes (~2.5 fold) no differences in lymphocytes and neutrophils</p> <p>2) fostered on saline basal: higher eosinophils (~4 fold) and monocytes (~2.5 fold) than saline groups but no differences in lymphocytes and neutrophils</p> <p>3) Fostered on OVA basal: no differences</p> | <p>No</p> |
| <p>Abdala-Valencia 2014; mouse; OVA<sup>2</sup></p> | <p>Cytokines, chemokines, indolamine dioxygenase and MHCII (2nd pregnancy, switched diets)</p> | <p>RT-qPCR and ELISA</p>        | <p>PD 13; 24 hours after pups challenged days 10-12</p> | <p>Asthmatic, basal diet compared to saline basal diet: higher concentrations of indolamine dioxygenase (~2 fold), IL-4 (~6 fold), CCL11 (~2 fold), CCL24 (~3 fold), TSLP (~1.5 fold), and IL-2 (~3 fold) but no difference for MHCII, IL-33, TNF-<math>\alpha</math>, IL-10, IFN-<math>\gamma</math>.</p> <p>Asthmatic mice switched onto 500mg <math>\alpha</math>-T (from basal diet) compared to saline basal diet: lower indolamine dioxygenase (~2.5 fold) and IL-33 (~2 fold). No other differences</p>                                                                                                                                                                                                                                                                                                                                                                                                                                                                                                                                              | <p>No</p> |

|                                               |                                       |                          |                                                  |                                                                                                                                                                                                                                                                                                                                                                                                                                                                                                                                                                                                                                                                                                                                                                                                                                                                                                      |    |
|-----------------------------------------------|---------------------------------------|--------------------------|--------------------------------------------------|------------------------------------------------------------------------------------------------------------------------------------------------------------------------------------------------------------------------------------------------------------------------------------------------------------------------------------------------------------------------------------------------------------------------------------------------------------------------------------------------------------------------------------------------------------------------------------------------------------------------------------------------------------------------------------------------------------------------------------------------------------------------------------------------------------------------------------------------------------------------------------------------------|----|
| Abdala-Valencia 2014; mouse; OVA <sup>2</sup> | Dendritic cell subsets                | Flow cytometry           | PD 13; 24 hours after pups challenged days 10-12 | <p>Of CD11b+ subsets in the pup lung (basal diet), higher number of resident cDCs (~1.3 fold) and alveolar DCs (~1.3 fold), but not monocyte derived DCs. No differences in 250 <math>\alpha</math>-T group.</p> <p>Of the CD11b- subsets in the pup lung (basal diet), lower alveolar DCs (~0.8 fold) but no differences in pDCs, CD103+ resident DCs, or alveolar macrophages. Only alveolar DCs were lower in 250 <math>\alpha</math>-T group (~0.7 fold).</p> <p>Of CD11b+ subsets in the pup liver (basal and 250 <math>\alpha</math>-T diet), no differences in mDCs or subtypes.</p> <p>Of the CD11b- subsets in the pup liver (basal diet), higher numbers of resident DCs (~1.4 fold), CD86+ resident DCs (~2.0 fold), and the mean fluorescence intensity of CD86 on resident DCs (~1.3 fold) and CD80 on resident DCs (~1.3 fold). No differences in 250 <math>\alpha</math>-T group.</p> |    |
| Abdala-Valencia 2014; mouse; OVA <sup>2</sup> | Lung and BAL cytokines and chemokines | RT-qPCR                  | PD 13; 24 hours after pups challenged days 10-12 | <p>Asthmatic mothers on basal diet: higher concentration from lung of IL-4 (~8 fold), IL-33 (~2 fold), CCL11 (~5.5 fold), CCL24 (~8 fold), and higher lavage concentration of CCL24 (~5 fold).</p> <p>Asthmatic mothers on 150, 250, or 500mg <math>\alpha</math>T diet: no differences</p>                                                                                                                                                                                                                                                                                                                                                                                                                                                                                                                                                                                                          | No |
| Abdala-Valencia 2014; mouse; OVA <sup>2</sup> | Lung immune cells                     | BAL stain and cell count | PD 13; 24 hours after pups challenged days 10-12 | <p>Asthmatic mothers on basal diet: higher percentage of eosinophils (~6 fold), and higher number of eosinophils, (~15 fold) monocytes (~3 fold), lymphocytes (~10 fold), and neutrophils (~10 fold)</p> <p>Asthmatic mothers on 150, 250, or 500mg <math>\alpha</math>T diet: no difference in number of macrophages, lymphocytes, neutrophils, or eosinophils number or percentage</p>                                                                                                                                                                                                                                                                                                                                                                                                                                                                                                             | No |
| Abdala-Valencia 2014; mouse; OVA <sup>2</sup> | OVA-specific serum IgE                | ELISA                    | PD 13; 24 hours after pups challenged days 10-12 | <p>Asthmatic mothers on basal diet: higher IgE concentration (~3-4 fold)</p> <p>Asthmatic mothers on 150, 250, or 500mg <math>\alpha</math>T diet: no difference</p>                                                                                                                                                                                                                                                                                                                                                                                                                                                                                                                                                                                                                                                                                                                                 | No |

|                                               |                                                          |                        |                                                                                    |                                                                                                                                                                                                                                                                                                                                                                                                    |    |
|-----------------------------------------------|----------------------------------------------------------|------------------------|------------------------------------------------------------------------------------|----------------------------------------------------------------------------------------------------------------------------------------------------------------------------------------------------------------------------------------------------------------------------------------------------------------------------------------------------------------------------------------------------|----|
| Abdala-Valencia 2016; mouse; OVA <sup>3</sup> | BAL lung immune cell response in allergen challenge pups | BAL stain & count      | PD 13; pups challenged days 10-12                                                  | Asthmatic, basal diet: higher numbers of eosinophils (~17 fold), monocytes (~2.5 fold), lymphocytes (~7.5 fold), and neutrophils (~21 fold)<br>Asthmatic, 250 $\gamma$ T diet compared to saline group with 250 $\gamma$ T diet: higher numbers of eosinophils (~16 fold), monocytes (~2.5 fold), lymphocytes (~8 fold), and neutrophils (~5.5 fold)                                               | No |
| Abdala-Valencia 2016; mouse; OVA <sup>3</sup> | Lung and BAL cytokines and chemokines                    | ELISA/protein array    | PD 13; pups challenged days 10-12                                                  | Asthmatic, basal diet: in BAL higher CCL11 (~3 fold), CCL24 (~1.5 fold), IL-5 (~3 fold), and in lung tissue higher amphiregulin (~1.5 fold), but no difference in ActivinA or GM-CSF.<br>Asthmatic, 250 $\gamma$ -T diet: in BAL higher CCL11 (~4 fold), CCL24 (~1.5 fold), IL-5 (~3 fold), and in lung tissue higher amphiregulin (~2 fold) and ActivinA (~1.5 fold) but no difference in GM-CSF. | No |
| Abdala-Valencia 2016; mouse; OVA <sup>3</sup> | OVA-specific IgE in allergen-challenged pups             | ELISA                  | PD 13; pups challenged days 10-12                                                  | Asthmatic basal diet and asthma + 250 $\gamma$ T: higher concentrations (~50 fold)                                                                                                                                                                                                                                                                                                                 | No |
| Akkoc 2008; mouse; OVA <sup>4</sup>           | Cytokine concentration of splenocytes                    | ELISA                  | PD 2 and 28; last challenge was day 20 of pregnancy, no offspring challenges       | Asthmatic with m. vaccae immunization on day 2: higher M.vaccae-specific IFN- $\gamma$ (~7.5 fold) but lower IL-5 (~0.14 fold), IL-5/IFN $\gamma$ ratio (~0.09 fold), and M vaccae specific IL-5/IFN $\gamma$ ratio (~0.02 fold)<br>Asthmatic with m. vaccae immunization on day 28: higher PHA-specific IFN $\gamma$ (~2.5 fold), but lower OVA-specific IL-5/IFN $\gamma$ ratio (~4 fold)        | No |
| Barrett 2003; dog; ragweed <sup>7</sup>       | BAL lung immune cells                                    | BAL cell stain & count | Baseline 1: 24 weeks, Baseline 2: 28-29 weeks, days 1-4 after ragweed instillation | Asthmatic mother, control offspring: no difference in eosinophil number but neutrophils higher at day 1 timepoint (~20 fold)<br>Asthmatic mother, allergic offspring: eosinophil number higher at baseline 2 (~3 fold), day 1 (~4 fold), and day 4 (~10 fold). Neutrophils higher at day 4 only (~5 fold)<br><i>Graphs too small to estimate magnitude of change</i>                               | No |

|                                         |                                    |                              |                                                                                                                  |                                                                                                                                                                                                                                                                                                                                                                                                                                                                                                                                                                   |    |
|-----------------------------------------|------------------------------------|------------------------------|------------------------------------------------------------------------------------------------------------------|-------------------------------------------------------------------------------------------------------------------------------------------------------------------------------------------------------------------------------------------------------------------------------------------------------------------------------------------------------------------------------------------------------------------------------------------------------------------------------------------------------------------------------------------------------------------|----|
| Barrett 2003; dog; ragweed <sup>7</sup> | Serum immunoglobulins              | ELISA                        | 4, 6, 8, 12, 16, 20, 24, 28 weeks; postnatal ragweed challenges 24 hours after birth and then weekly for 4 weeks | Asthmatic mother, control offspring: no differences in IgE or Ragweed-specific IgE. Ragweed-specific IgG was higher at 24 weeks only (~4 fold).<br>Asthmatic mother, allergic offspring: no differences for IgE or Ragweed-specific IgE, but Ragweed-specific IgG: higher at 4 and 6 weeks (~3.6-4.0 fold)                                                                                                                                                                                                                                                        | No |
| Carpe 2012; rat; OVA <sup>8</sup>       | BAL lung immune cells              | BAL cell stain & count       | PD 1, 7, 14; last challenge was GD 19, no offspring challenges                                                   | In Lewis rats compared to Lewis controls: higher number of neutrophils at day 14 (>500 fold) and proportion at day 7 (~2.2 fold) & 14 (>12 fold), but no difference in eosinophils number or proportion.<br>In Brown Norway rats compared to Brown Norway controls: higher neutrophil number higher at days 1 (~9.5 fold) & 7 (~3 fold) and proportion at days 1 (~4.5 fold) & 7 (~3.5 fold) but not 14. Number of eosinophils higher at days 1 (~2 fold) & 7 (~5 fold) but not day 14, and proportion higher at days 7 (~6.5 fold) & 14 (~2 fold) but not day 1. | No |
| Carpe 2012; rat; OVA <sup>8</sup>       | Serum OVA-specific IgE & cytokines | ELISA                        | PD 14; last challenge was GD 19, no offspring challenges                                                         | In Lewis rats compared to Lewis controls: higher IgE (~1.5 fold), but no difference for IL-1, TNF- $\alpha$ , and GRO/KC.<br>In Brown Norway rats compared to Brown Norway controls: higher IgE (~2 fold), IL-1 $\beta$ (~1.4 fold), TNF- $\alpha$ (~1.4 fold), and GRO/KC (~1.3 fold)                                                                                                                                                                                                                                                                            | No |
| Fedulov 2007; mouse; OVA <sup>13</sup>  | BAL lung immune response           | BAL differential cell count  | 0-2, 3-5, 6-8, 10-12 weeks postnatally; offspring challenged at 0, 3, 6 or 8 weeks with suboptimal protocol      | Eosinophils number higher at weeks 0-2 (~11 fold), 3-5 (~10 fold), 6-8 (~100 fold), 10-12 weeks (~40 fold). Eosinophil percentage higher at weeks 0-2 (~8.5 fold), 3-5 (~35 fold), 6-8 (~50 fold), 10-12 weeks (~45 fold).                                                                                                                                                                                                                                                                                                                                        | No |
| Fedulov 2007; mouse; OVA <sup>13</sup>  | Lung inflammation                  | Histology inflammatory index | 0-2, 3-5, 6-8, 10-12 weeks postnatally; offspring challenged at 0, 3, 6 or 8 weeks with suboptimal protocol      | Inflammation higher at weeks 0-2 (~12 fold), 3-5 (~10 fold), 6-8 (~25 fold), 10-12 weeks (~13 fold)                                                                                                                                                                                                                                                                                                                                                                                                                                                               | No |

|                                        |                                                            |                                       |                                                                          |                                                                                                                                                                                                                                                                            |    |
|----------------------------------------|------------------------------------------------------------|---------------------------------------|--------------------------------------------------------------------------|----------------------------------------------------------------------------------------------------------------------------------------------------------------------------------------------------------------------------------------------------------------------------|----|
| Fedulov 2011; mouse; OVA <sup>14</sup> | Antigen presenting splenic dendritic cells                 | Counts per minute                     | PD 14; offspring challenged at 13-15 days with suboptimal protocol       | Increased activity of antigen presenting cells (~4 fold)                                                                                                                                                                                                                   | No |
| Fedulov 2011; mouse; OVA <sup>14</sup> | Lung immune response in CAS model of asthma                | BAL cell count and inflammatory index | After PD 15; offspring challenged at 13-15 days with suboptimal protocol | In CAS challenged offspring who received donor dendritic cells from pups of asthmatic mothers: eosinophils were higher (~4.5 fold)                                                                                                                                         | No |
| Fedulov 2011; mouse; OVA <sup>14</sup> | Lung immune response in OVA model of asthma                | BAL cell count and inflammatory index | PD 14; offspring challenged at 13-15 days with suboptimal protocol       | In OVA challenged offspring who received donor dendritic cells from pups of asthmatic mothers: higher eosinophil number (~2.8 fold) and inflammation index (~1.8 fold)                                                                                                     | No |
| Fedulov 2011; mouse; OVA <sup>14</sup> | Phenotype profiling of splenic dendritic cells             | Flow cytometry                        | PD 14; offspring challenged at 13-15 days with suboptimal protocol       | No differences in surface profiling of naïve d14 dendritic cells                                                                                                                                                                                                           | No |
| Gerhold 2012; mouse; OVA <sup>16</sup> | IL-10 and T(reg) cells in spleen and bronchial lymph nodes | Flow cytometry                        | PD 21; before offspring aerosol challenge and sensitisation              | In control offspring of asthmatic mothers: spleen T-reg cells higher (~1.7 fold), and IL-10 in spleen mononuclear cells higher (~2.8 fold)<br>In asthmatic offspring of asthmatic mothers: no difference bronchial lymph node T-reg cells                                  | No |
| Gerhold 2012; mouse; OVA <sup>16</sup> | OVA-specific cytokines (short term)                        | ELISA                                 | PD 52; offspring challenged on days 48-50                                | In control offspring of asthmatic mothers: no difference in IL-5, IL-13, and IFN- $\gamma$ but IL-10 higher (~2 fold)<br>In asthmatic offspring of asthmatic mothers, all cytokines higher: IL-5 (~30 fold), IL-13 (~4 fold), IL-10 (~15 fold), IFN- $\gamma$ (~120 fold?) | No |
| Gerhold 2012; mouse; OVA <sup>16</sup> | Serum IgE and BAL immune cells (long term)                 | ELISA, lavage, morphometric analysis  | PD 147; offspring challenged on days 143-145                             | In asthmatic offspring of asthmatic mothers: no difference in IgE, IL-5, leucocytes, but higher number of eosinophils                                                                                                                                                      | No |



|                                               |                                             |                                      |                                                                                                         |                                                                                                                                                                                                                                                                                                                         |    |
|-----------------------------------------------|---------------------------------------------|--------------------------------------|---------------------------------------------------------------------------------------------------------|-------------------------------------------------------------------------------------------------------------------------------------------------------------------------------------------------------------------------------------------------------------------------------------------------------------------------|----|
| Gerhold 2012; mouse; OVA <sup>16</sup>        | Serum IgE and BAL immune cells (short term) | ELISA, lavage, morphometric analysis | PD 52; offspring challenged on days 48-50                                                               | In control offspring of asthmatic mothers: no differences for IgE, Leucocytes, or eosinophils but IL-5 higher (~2.3 fold)<br>In asthmatic offspring of asthmatic mothers: higher IgE (~2 fold) and IL-5 (~1.7 fold), but no difference in leucocytes or eosinophils                                                     | No |
| Hamada 2003; mouse; OVA <sup>17</sup>         | BAL immune response                         | BAL cell stain & count               | PD 15; offspring aerosol challenge PDs 12-14                                                            | Higher eosinophil number (~9-100 fold) and proportion (~6-30 fold) in asthmatic offspring of asthmatic mothers, and when offspring asthma was induced with CAS instead of OVA (~9 and ~6 fold respectively); results were irrespective of pregnancy exposures. No difference in control offspring of asthmatic mothers. | No |
| Hamada 2003; mouse; OVA <sup>17</sup>         | Serum OVA-specific IgE                      | ELISA                                | PD 15; offspring aerosol challenge PDs 12-14                                                            | Higher IgE concentration in control and asthmatic offspring of asthmatic mothers (not detectable in controls), irrespective of pregnancy exposures.                                                                                                                                                                     | No |
| Heller 2014; cat; bermuda grass <sup>18</sup> | BAL eosinophil response                     | BAL cell count                       | 3, 4, 6, 8 months; aerosol challenge twice weekly for 12 weeks                                          | For control offspring of asthmatic mothers: eosinophil proportion higher at 8 months (~22 fold) than sensitised control offspring, but no differences at 3, 4, 6 months. No differences in eosinophils for asthmatic offspring of asthmatic mothers.                                                                    | No |
| Heller 2014; cat; bermuda grass <sup>18</sup> | BGA-Specific Immunoglobulins                | ELISA & Intradermal testing          | 3, 4, 6, 8 months; aerosol challenge twice weekly for 12 weeks                                          | In control offspring of asthmatic mothers: BGA-specific IgE was detectable in all.<br>In asthmatic offspring of asthmatic mothers: BGA-specific IgE was undetectable in all.                                                                                                                                            | No |
| Herz 2001; mouse; OVA <sup>19</sup>           | Serum anti-BLG IgG1                         | ELISA                                | PDs 1, 7, 14, and 21; mothers OVA challenged every second day during pregnancy, no offspring challenges | No differences on day 1 but higher at days 7 (~4 fold), 14 (~4 fold), and 21 (~3 fold).                                                                                                                                                                                                                                 | No |

|                                             |                                       |                                       |                                                                                                                  |                                                                                                                                                                                                                                                                                                                                                                                                                                                                                                                                                                                                       |    |
|---------------------------------------------|---------------------------------------|---------------------------------------|------------------------------------------------------------------------------------------------------------------|-------------------------------------------------------------------------------------------------------------------------------------------------------------------------------------------------------------------------------------------------------------------------------------------------------------------------------------------------------------------------------------------------------------------------------------------------------------------------------------------------------------------------------------------------------------------------------------------------------|----|
| Herz 2001;<br>mouse;<br>OVA <sup>19</sup>   | Serum cytokine profile                | ELISA                                 | End of pregnancy, PD 1 and 28; mothers OVA challenged every second day during pregnancy, no offspring challenges | IFN- $\gamma$ lower at day 1 (~0.18 fold) but not day 28. No differences in IL-4 on day 1 or 28.                                                                                                                                                                                                                                                                                                                                                                                                                                                                                                      | No |
| Herz 2001;<br>mouse;<br>OVA <sup>19</sup>   | T cell populations                    | Flow cytometry and ELISA              | PD 1-2; mothers OVA challenged every second day during pregnancy, no offspring challenges                        | Thy1+ cells produce less IFN- $\gamma$ upon stimulation (~0.2 fold)                                                                                                                                                                                                                                                                                                                                                                                                                                                                                                                                   | No |
| Hubeau 2006;<br>mouse;<br>OVA <sup>20</sup> | BAL cytokines                         | Immunoassay                           | Postnatal 16 offspring aerosol challenged days 12-14                                                             | In OVA challenge pups of recipient asthmatic mothers of DO11.1 T cells, there was no difference in IFN $\gamma$ , IL-10, IL-4 but higher concentrations of IL-5 (~1.6 fold) and IL-13 (~5.5 fold)                                                                                                                                                                                                                                                                                                                                                                                                     | No |
| Hubeau 2006;<br>mouse;<br>OVA <sup>20</sup> | Lung immune cells                     | BAL stain and cell count              | PD 16 offspring aerosol challenged days 12-14                                                                    | In OVA challenged offspring of asthmatic DO11.1 T cell recipient mothers, higher total cell count (~2.9 fold) and eosinophils (~6 fold), but no difference for macrophages or lymphocytes. No differences for CAS challenged pups of asthmatic mothers who received BALB/c T cells. In CAS challenged pups of recipient asthmatic of DO11.1 T cells, higher total cell count (~5.3 fold), eosinophils (~6.4 fold), and lymphocytes (~3 fold), but macrophages were no different.<br><br>Inflammatory infiltration of mononuclear cells and eosinophils only observable in pups from recipient mothers | No |
| Hubeau 2007;<br>mouse;<br>OVA <sup>21</sup> | BAL lung immune cells                 | BAL cell stain & count                | PDs 15-16 offspring aerosol challenged days 12-14                                                                | In untreated offspring of asthmatic mothers there was "substantial" inflammatory infiltration in the airways. No differences in macrophages, eosinophils, or lymphocyte proportions reported.                                                                                                                                                                                                                                                                                                                                                                                                         | No |
| Hubeau 2007;<br>mouse;                      | Spleen cellularity and T cell subsets | trypan blue staining & flow cytometry | PD 7; after day 5 OVA injection but before challenges                                                            | Cellularity overall, T cells overall and Foxp3-/CD25- T cell subset were higher in untreated offspring of asthmatic mothers without antibodies (~2.1 fold). No differences were observed in other T cell subsets.                                                                                                                                                                                                                                                                                                                                                                                     | No |

|                                           |                                         |                              |                                                                               |                                                                                                                                                                                                                                                                                                                                                                                                                                                                                           |     |
|-------------------------------------------|-----------------------------------------|------------------------------|-------------------------------------------------------------------------------|-------------------------------------------------------------------------------------------------------------------------------------------------------------------------------------------------------------------------------------------------------------------------------------------------------------------------------------------------------------------------------------------------------------------------------------------------------------------------------------------|-----|
| OVA <sup>21</sup>                         |                                         |                              |                                                                               |                                                                                                                                                                                                                                                                                                                                                                                                                                                                                           |     |
| Lebold;<br>mouse;<br>HDM <sup>22</sup>    | Chemokines and<br>cytokines transcripts | RT-qPCR                      | 8 weeks + 18 days; offspring<br>challenged at 8 weeks + 14-<br>17 days        | In offspring of asthmatic mothers without offspring allergen challenges: 17<br>transcripts were different. 8 upregulated and 9 downregulated.<br><br>In offspring of asthmatic mothers that were allergen challenged: 25 genes<br>differentially regulated compared to both reference groups                                                                                                                                                                                              | No  |
| Lebold;<br>mouse;<br>HDM <sup>22</sup>    | Immune response -<br>inflammatory cells | BAL stain & cell<br>counting | 8 weeks; offspring<br>challenged at 8 weeks + 14-<br>17 days                  | No differences between untreated offspring of asthmatic mothers and<br>untreated offspring of control mothers. Relative to challenged offspring of<br>control mothers, allergen challenged offspring of asthmatic mothers had<br>higher total cells (~2.7 fold) and eosinophils (~3.1 fold) but not neutrophils<br>or macrophages.                                                                                                                                                        | No  |
| Leme 2006;<br>mouse;<br>OVA <sup>23</sup> | Lung immune cells                       | BAL stain & cell<br>count    | PDs 16-17; offspring<br>challenged days 13-15                                 | Whether born to asthmatic mothers or nursed by asthmatic mothers,<br>higher eosinophils numbers (~40-100 fold) and proportions (~14-20 fold).<br>Results were similar when offspring were CAS challenged, instead of OVA<br>(~40-100 and ~17-21 fold respectively). Likewise, eosinophil numbers and<br>proportions were higher when adoptive nursing was delayed by 3 days<br>(~200-250 fold). Eosinophil and mononuclear cell accumulation were<br>observed around airways and vessels. | No  |
| Lenz 2019;<br>rat; OVA <sup>24</sup>      | Mast cells and<br>microglia             | Staining and<br>stereology   | PD 4 and 5; offspring not<br>challenged, last maternal<br>challenge was GD 15 | In males, no difference in overall mast cell number but higher proportion of<br>degranulated mast cells (~1.2 fold). No differences in proportion of<br>ameboid microglia<br><br>In females, higher overall mast cell number (~1.5 fold), proportion of<br>degranulated mast cells (~1.3 fold) and proportion of ameboid microglia<br>(~1.7 fold)                                                                                                                                         | Yes |
| Lopez-<br>Exposito<br>2015;<br>mouse;     | BAL inflammatory cells                  | BAL cell stain &<br>count    | PD 16; offspring challenged<br>PDs 12-14                                      | In offspring of asthmatic mothers, there were higher total cells (~6 fold),<br>macrophages (~5.4 fold), eosinophils (~16 fold), neutrophils (~19 fold), and<br>lymphocytes (~16 fold), irrespective of comparisons with offspring of<br>control mothers having allergen or sham challenge                                                                                                                                                                                                 | No  |

|                                               |                                                          |                        |                                                                                 |                                                                                                                                                                                                                                                                                                                                                                                                                                                                                                                                                                                                             |    |
|-----------------------------------------------|----------------------------------------------------------|------------------------|---------------------------------------------------------------------------------|-------------------------------------------------------------------------------------------------------------------------------------------------------------------------------------------------------------------------------------------------------------------------------------------------------------------------------------------------------------------------------------------------------------------------------------------------------------------------------------------------------------------------------------------------------------------------------------------------------------|----|
| OVA <sup>25</sup>                             |                                                          |                        |                                                                                 |                                                                                                                                                                                                                                                                                                                                                                                                                                                                                                                                                                                                             |    |
| Lopez-Exposito 2015; mouse; OVA <sup>25</sup> | BAL inflammatory cells (variable offspring OVA exposure) | BAL cell stain & count | PD 16; offspring challenged PDs 12-14                                           | <p>With low dose OVA allergen exposure, higher numbers of lymphocytes (~25 fold), eosinophils (~27 fold) and neutrophils (~22 fold) but not macrophages. There were no differences in offspring challenged with PBS or ragweed.</p> <p>With higher dose exposure, no differences were reported between asthma and controls.</p>                                                                                                                                                                                                                                                                             | No |
| Lopez-Exposito 2015; mouse; OVA <sup>25</sup> | Serum cytokines                                          | ELISA                  | PD 16; offspring challenged PDs 12-14                                           | Higher concentrations of IL-10 (~2.5 fold), but lower concentration of IFN- $\gamma$ (~0.23 fold), irrespective of control pup challenge. No differences in IL-13 concentration or IL-10/IL-13 or IFN- $\gamma$ /IL-13 ratios. No reported differences between asthma and control for CXCL1/KC and Eotaxin-1.                                                                                                                                                                                                                                                                                               | No |
| Lopez-Exposito 2015; mouse; OVA <sup>25</sup> | Serum OVA-specific immunoglobulins                       | ELISA                  | PD 16; offspring challenged PDs 12-14                                           | Higher concentration of IgG1, IgG2a, and IgG1:IgG2a ratio, irrespective of offspring of control mothers having allergen or sham challenge (minimal detection in control offspring)                                                                                                                                                                                                                                                                                                                                                                                                                          | No |
| Matson 2007; mouse; OVA <sup>26</sup>         | BAL lung immune cells                                    | BAL stain & cell count | 24 hours after last challenge; pups challenged at postnatal week 6-7 for 7 days | <p>No differences in OVA-AI(OH)<sub>3</sub> challenged progeny of OVA-AI(OH)<sub>3</sub> challenged mothers.</p> <p>In OVA-AI(OH)<sub>3</sub> challenged progeny of OVA-CFA challenged mothers, lower numbers of eosinophils (~0.5 fold) and CD4+ lymphocytes (~0.4 fold) and CD8+ lymphocytes (~0.3 fold) but no differences for macrophages or total lymphocytes.</p> <p>In a second cohort of OVA-AI(OH)<sub>3</sub> challenged progeny from OVA-CFA challenged mothers, lower numbers of eosinophils (~0.04 fold) and total lymphocytes (~0.25 fold) but no difference in individual populations of</p> | No |

|                                       |                                             |                |                                                                                 |                                                                                                                                                                                                                                                                                                                                                                                                                                |    |
|---------------------------------------|---------------------------------------------|----------------|---------------------------------------------------------------------------------|--------------------------------------------------------------------------------------------------------------------------------------------------------------------------------------------------------------------------------------------------------------------------------------------------------------------------------------------------------------------------------------------------------------------------------|----|
|                                       |                                             |                |                                                                                 | CD4+ and CD8+ lymphocytes or macrophages.                                                                                                                                                                                                                                                                                                                                                                                      |    |
| Matson 2007; mouse; OVA <sup>26</sup> | OVA-specific serum immunoglobulins          | ELISA          | 24 hours after last challenge; pups challenged at postnatal week 6-7 for 7 days | No difference in offspring of Bovine Specific Antigen challenged mothers with OVA-CFA.<br><br>In offspring of OVA challenged mothers with OVA-CFA, IgE was lower in pups (~0.2 fold). No differences in IgG1, IgG2a, or IgA.<br><br>In offspring of OVA challenged mothers with OVA-Al(OH) <sub>3</sub> challenge, there was no difference in IgE.                                                                             | No |
| Matson 2009; mouse; OVA <sup>27</sup> | BAL lung immune cells and IL-5              | Flow cytometry | 24 hours after final challenge; postnatal challenges were postnatal week 6-8    | Control offspring nursed by asthmatic mothers: lower numbers of eosinophils (~0.1 fold), CD4+ lymphocytes (~0.3 fold) and CD8+ lymphocytes (~0.25 fold).<br><br>Control offspring nursed by B cell deficient asthmatic mothers: no differences<br><br>Offspring of asthmatic mothers, nursed by asthmatic mothers: eosinophils lower (~0.4 fold)                                                                               | No |
| Matson 2009; mouse; OVA <sup>27</sup> | OVA-specific serum immunoglobulins and IL-5 | ELISA          | 24 hours after final challenge; postnatal challenges were postnatal week 6-8    | Control offspring nursed by asthmatic mothers: IgG1 and IgA were higher (not detectable in controls), but IgE (<0.02 fold) and IL-5 lower.<br><br>Control offspring nursed by B cell deficient asthmatic mothers: IgE was higher (~1.6 fold) but no difference in IL-5.<br><br>Offspring of asthmatic mothers, nursed by asthmatic mothers: IgG1 and IgA were higher (not detectable in controls), but IgE lower (<0.01 fold). | No |
| Matson 2010; mouse; OVA <sup>28</sup> | Adult serum OVA-specific IgE concentration  | ELISA          | PD 59; after 4 day aerosol challenge in offspring                               | Same genotype as control (FcRn <sup>+/-</sup> ) but nursed by asthmatic mother: lower IgE (~0.17 fold). FcRn <sup>+/+</sup> genotype nursed by asthmatic mother: lower IgE (~0.08 fold)                                                                                                                                                                                                                                        | No |

|                                                                        |                        |                                      |                                                   |                                                                                                                                                                                                                                                                                                                                                                                               |     |
|------------------------------------------------------------------------|------------------------|--------------------------------------|---------------------------------------------------|-----------------------------------------------------------------------------------------------------------------------------------------------------------------------------------------------------------------------------------------------------------------------------------------------------------------------------------------------------------------------------------------------|-----|
| Matson 2010; mouse; OVA <sup>28</sup>                                  | BAL lung immune cells  | BAL stain & count and flow cytometry | PD 59; after 4 day aerosol challenge in offspring | Control offspring of same genotype (FcRn <sup>+/-</sup> ) but nursed by asthmatic mother: fewer eosinophils (~0.2 fold), CD4+ (~0.4 fold), IL33R+ (~0.5 fold), and CD8+ B cells (~0.2 fold)<br>Offspring of asthmatic mothers with FcRn <sup>+/+</sup> genotype nursed by asthmatic mother: fewer eosinophils (~0.2 fold), CD4+ (~0.4 fold), IL33R+ (~0.5 fold), and CD8+ B cells (~0.4 fold) | No  |
| Matson 2010; mouse; OVA <sup>28</sup>                                  | Lung inflammation      | Lung histology (H&E stain)           | PD 59; after 4 day aerosol challenge in offspring | Histologically, perivascular and peribronchiolar cuffing & eosinophilic inflammation in FcRn <sup>-/-</sup> control offspring nursed by asthmatic mother, but reduced inflammation in FcRn <sup>+/-</sup> control offspring nursed by asthmatic mother and FcRn <sup>+/+</sup> offspring of asthmatic mothers nursed by asthmatic mother.                                                     |     |
| Nakata 2010; mouse; OVA <sup>30</sup>                                  | BAL lung immune cells  | BAL cell stain & count               | PD 46; offspring challenged days 43-45            | Lower total cell count (~0.25 fold) and eosinophil number (~0.14 fold) in Wild Type FcRn <sup>+/+</sup> offspring of OVA sensitised mothers. Also lower in offspring of mothers administered i.v or oral OVA-specific IgG1<br>No different in FcRn <sup>-/-</sup> offspring of sensitised mothers.                                                                                            | No  |
| Nakata 2010; mouse; OVA <sup>30</sup>                                  | Serum OVA-specific IgE | ELISA                                | PD 42; offspring challenged days 43-45            | Lower IgE concentration (~0.12 fold) in Wild Type (FcRn <sup>+/+</sup> ) offspring of OVA sensitised FcRn <sup>+/+</sup> mothers. IgE lower in offspring of mothers administered i.v or oral OVA-specific IgG1 (~0.25-0.35 fold)<br>No different in FcRn <sup>-/-</sup> offspring of sensitised mothers.                                                                                      | No  |
| Pucheu-Haston 2010; mouse; Metarhizium anisopliae fungus <sup>32</sup> | BAL lung immune cells  | BAL stain & count                    | PD 71; offspring challenges on PDs 49, 62, and 69 | Compared to Hank's buffered saline solution vehicle control: higher total BAL protein (~1.8 fold), total cells (~11 fold), macrophages (~4.7 fold), lymphocytes (~27 fold), and eosinophils (~34 fold), irrespective of offspring allergen exposure. No difference in neutrophils for MACA exposed offspring but higher in dust mite exposed offspring (~14 fold). No sex differences.        | Yes |

|                                                                               |                                                   |                         |                                                                                           |                                                                                                                                                                                                                                                                                  |             |
|-------------------------------------------------------------------------------|---------------------------------------------------|-------------------------|-------------------------------------------------------------------------------------------|----------------------------------------------------------------------------------------------------------------------------------------------------------------------------------------------------------------------------------------------------------------------------------|-------------|
| Pucheu-Haston 2010; mouse; <i>Metarhizium anisopliae</i> fungus <sup>32</sup> | Immune response – MACA-specific BAL cells         | BAL cell count          | PD 71; offspring challenges on PDs 49, 62, and 69                                         | No difference in total protein, total BAL cells, macrophages, neutrophils, lymphocytes, or eosinophils                                                                                                                                                                           | Yes         |
| Pucheu-Haston 2010; mouse; <i>Metarhizium anisopliae</i> fungus <sup>32</sup> | Lactate dehydrogenase activity & Serum IgE        | ELISA and protein assay | PD 71; offspring challenges on PDs 49, 62, and 69                                         | Compared to Hank's buffered saline solution vehicle control:<br>No differences for Lactate dehydrogenase activity and serum IgE was higher in females (~2.2 fold) in MACA and HDM groups but not control group, and no treatment effect                                          | Yes         |
| Pucheu-Haston 2010; mouse; <i>Metarhizium anisopliae</i> fungus <sup>32</sup> | LDH activity & Serum IgE - MACA exposed offspring | ELISA and protein assay | PD 71; offspring challenges on PDs 49, 62, and 69                                         | No difference between maternal treatment groups for LDH activity, total serum IgE, or MACA-specific IgE                                                                                                                                                                          | Yes         |
| Pulczinski 2021; mouse; HDM <sup>33</sup>                                     | BAL lung immune cells - all generations           | BALF cell stain & count | 6 weeks + 23 days; offspring (all generations) challenge on 6 weeks + 14, 18, and 21 days | Total BAL cells were higher in challenged offspring of asthmatic mothers in generation 1 (~1.7 fold), 2 (~1.5 fold), and 3 (~1.2 fold). No difference between offspring of controls and asthmatics when offspring were not challenged.                                           | Male only   |
| Sodemann 2020; mouse; OVA or CAS <sup>36</sup>                                | BAL (BAL) lung immune cells                       | BAL cell stain & count  | PD 49; offspring OVA aerosol challenges on PDs 46-48                                      | In offspring of CAS challenged mothers: no difference in leucocytes, eosinophils, lymphocytes, or macrophages<br><br>In offspring of OVA challenged mothers: higher numbers of leucocytes (~2.8 fold), eosinophils (~3 fold), lymphocytes (~5 fold), and macrophages (~2.7 fold) | Female only |

|                                                |                                    |                                     |                                                                                |                                                                                                                                                                                                                                                                                                                         |             |
|------------------------------------------------|------------------------------------|-------------------------------------|--------------------------------------------------------------------------------|-------------------------------------------------------------------------------------------------------------------------------------------------------------------------------------------------------------------------------------------------------------------------------------------------------------------------|-------------|
| Sodemann 2020; mouse; OVA or CAS <sup>36</sup> | Serum immunoglobulins              | ELISA                               | PD 49; offspring OVA aerosol challenges on PDs 46-48                           | In offspring of CAS challenged mothers: higher concentration of total IgG1 (~1.7 fold), and OVA-IgG1 (~4.5 fold) but no difference for OVA-IgE<br><br>In offspring of OVA challenged mothers: no difference in total IgG1, higher concentration of OVA-IgG1 (~1.5 fold), but lower concentration of OVA-IgE (~0.3 fold) | Female only |
| Sodemann 2020; mouse; OVA or CAS <sup>36</sup> | T-regulatory cells                 | Immunohistochemistry                | PD 49; offspring OVA aerosol challenges on PDs 46-48                           | In offspring of CAS challenged mothers: no difference in lung or lymph node T-reg cells<br><br>In offspring of OVA challenged mothers: lower numbers of lung (~0.6 fold) and lymph node T-reg cells (~0.5 fold)                                                                                                         | Female only |
| Sodemann 2020; mouse; OVA or CAS <sup>36</sup> | Asn-297 IgG antibody glycosylation | Nano-liquid chromatography          | PD 49; offspring OVA aerosol challenges on PDs 46-48                           | In offspring of CAS challenged mothers: no significant difference in IgG1 G0, or G2S1 glycosylation, but less G1S1 (~ fold), G3S1 (~ fold) and G2S2 (~ fold).<br><br>In offspring of OVA challenged mothers: higher concentration of IgG1 G0, but lower G1S1 (~ fold), G3S1 (~ fold) and G2S2 (~ fold) glycosylation.   | Female only |
| Other (non-lung) organ outcomes                |                                    |                                     |                                                                                |                                                                                                                                                                                                                                                                                                                         |             |
| Abdala-Valencia 2014; mouse; OVA <sup>2</sup>  | Liver $\alpha$ -T                  | High-pressure liquid chromatography | PD 13; 24 hours after pups challenged days 10-12                               | No differences                                                                                                                                                                                                                                                                                                          | No          |
| Abdala-Valencia 2016; mouse; OVA <sup>3</sup>  | Liver $\gamma$ -T                  | High pressure liquid chromatography | PD 13; pups challenged days 10-12                                              | Higher in asthma with 250 $\gamma$ T than basal diets (~1.5 fold), but no other differences                                                                                                                                                                                                                             | No          |
| Allina 2011; mouse; OVA <sup>5</sup>           | Hepatic fibrosis score             | Histological analysis (H+E stain)   | 8 weeks postnatal; maternal challenges all prenatally, no offspring challenges | Only male offspring of asthmatic and smoke-exposed mothers had a stage 2 hepatic fibrosis score with increased collagen (~3 fold). Females and all other groups were no different                                                                                                                                       | Yes         |
| Church 2021;                                   | Hypothalamus cytokine              | Multiplex bead-based                | 9 weeks; offspring not postnatally challenged                                  | In early OVA exposed asthmatic group, there was lower concentration of G-CSF (~0.13-0.14 fold), IL-7 (~0.3 fold), IL-4 (~0.3-0.5 fold), and IFN- $\gamma$ (~0.7                                                                                                                                                         | Yes         |



|                                        |                                                                                              |                                      |                                                                                                                   |                                                                                                                                                                                                                                                                                                                               |              |
|----------------------------------------|----------------------------------------------------------------------------------------------|--------------------------------------|-------------------------------------------------------------------------------------------------------------------|-------------------------------------------------------------------------------------------------------------------------------------------------------------------------------------------------------------------------------------------------------------------------------------------------------------------------------|--------------|
| mouse;<br>OVA <sup>9</sup>             | concentrations                                                                               | immunoassay                          |                                                                                                                   | fold) in males and females, but TNF $\alpha$ was only lower in males (~0.5 fold).<br><br>Late females had lower IL-7 concentrations than late males (~0.5 fold), irrespective of treatment.                                                                                                                                   |              |
| Feng 2012;<br>rat; OVA <sup>15</sup>   | Adrenal medulla tissue<br>microscopy                                                         | Light and electron<br>microscopy     | <i>Unclear</i> ; offspring protocol<br>began 6-8 weeks, with daily<br>aerosol challenge on<br>protocol days 14-21 | Light microscopy: worsened vacuolar degeneration and lipids<br>Electron microscopy: severe degranulation of chromaffin granules, swollen<br>cytoplasm                                                                                                                                                                         | No           |
| Feng 2012;<br>rat; OVA <sup>15</sup>   | Anti-<br>phenylethanolamine-n-<br>methyl transferase<br>immunostaining of<br>adrenal medulla | Immunohistochemi<br>stry             | <i>Unclear</i> ; offspring protocol<br>began 6-8 weeks, with daily<br>aerosol challenge on<br>protocol days 14-21 | No difference                                                                                                                                                                                                                                                                                                                 | No           |
| Feng 2012;<br>rat; OVA <sup>15</sup>   | Peripherin expression<br>in adrenal medulla                                                  | Western blotting<br>and RT-qPCR      | <i>Unclear</i> ; offspring protocol<br>began 6-8 weeks, with daily<br>aerosol challenge 14-21<br>days later       | Peripherin: higher gene (~1.1 fold) and protein expression (~1.2 fold)                                                                                                                                                                                                                                                        | No           |
| Lebold;<br>mouse;<br>HDM <sup>22</sup> | Nerve morphology                                                                             | 3D modelling                         | 8 weeks + 18 days; offspring<br>challenged at 8 weeks + 14-<br>17 days                                            | Higher nerve length (~2 fold) and nerve branch points (~1.7 fold) for<br>offspring of asthmatic mothers, irrespective of offspring challenge or not                                                                                                                                                                           | No           |
| Lenz 2019;<br>rat; OVA <sup>24</sup>   | Neuronal spine density                                                                       | Golgi-Cox staining<br>and stereology | PD 4-5 (neonatal), day 90<br>(adult) ; offspring not<br>challenged, last maternal<br>challenge was GD 15          | As neonates, no difference in total dendritic length, cell body area, but<br>spine density was lower in males (~0.7 fold) and higher in females (~1.4<br>fold). In adulthood, spine density was not different in males but higher in<br>females (~1.7 fold).                                                                  | Yes          |
| Wu 2011;<br>rat; OVA <sup>40</sup>     | Adrenal medulla<br>histological changes                                                      | Electron<br>microscopy               | PD 3, 7, 14, 30, 60; no<br>offspring challenges,<br>maternal challenges were<br>daily from GD 14-21               | Adrenal medulla cells showed cytoplasm and mitochondrial oedema, some<br>spindle shape chromaffin cells with decreased particles and a small amount<br>of connective tissue, vacuolar degeneration, decreased EPI secretory<br>granule, chromaffin cells fibre outgrowth and changed into spindle shape<br>with long fusiform | Male<br>only |
| Wu 2011;<br>rat; OVA <sup>40</sup>     | Adrenal medulla:<br>protein expression of<br>nerve growth factor in<br>adrenal medulla       | ELISA                                | PD 3, 7, 14, 30, 60; no<br>offspring challenges,<br>maternal challenges were<br>daily from GD 14-21               | Higher expression at days 3-14 (~1.3-1.5 fold)                                                                                                                                                                                                                                                                                | Male<br>only |

|                                                  |                                                                                        |                           |                                                                                                                         |                                                                                                                                                                                                                         |              |
|--------------------------------------------------|----------------------------------------------------------------------------------------|---------------------------|-------------------------------------------------------------------------------------------------------------------------|-------------------------------------------------------------------------------------------------------------------------------------------------------------------------------------------------------------------------|--------------|
| Wu 2011;<br>rat; OVA <sup>40</sup>               | Adrenal medulla:<br>protein expression of<br>phenylethanolamine<br>N-methyltransferase | Immunohistochemi<br>stry  | PD 3, 7, 14, 30, 60; no<br>offspring challenges,<br>maternal challenges were<br>daily from GD 14-21                     | Lower expression from days 3-14 (~0.7 fold)                                                                                                                                                                             | Male<br>only |
| Respiratory outcomes                             |                                                                                        |                           |                                                                                                                         |                                                                                                                                                                                                                         |              |
| Babayigit<br>2008;<br>mouse;<br>OVA <sup>6</sup> | Histopathological lung<br>parameters                                                   | Electron<br>Microscopy    | PD 1; final challenge was GD<br>18, no offspring challenges                                                             | Thicker basement membrane (~2.5 fold), epithelium (~1.5 fold), and<br>subepithelial smooth muscle layer (~1.5 fold)                                                                                                     | No           |
| Carpe 2012;<br>rat; OVA <sup>8</sup>             | Airway responsiveness                                                                  | Methacholine<br>challenge | PD 14; last challenge was GD<br>19, no offspring challenges                                                             | In Lewis rats, higher resistance at 12.5mg methacholine (~2.5 fold), but not<br>baseline, 25, or 50 mg.<br>In Brown Norway rats, higher resistance at 50mg methacholine (~2 fold),<br>but not baseline, 12.5, or 25 mg. | No           |
| Fedulov<br>2005;<br>mouse;<br>OVA <sup>12</sup>  | Airway responsiveness<br>– different allergen for<br>offspring                         | Methacholine<br>challenge | PD 15; offspring challenged<br>at days 13-15 with<br>suboptimal protocol                                                | In pups of asthmatic mothers also having non-CpG ODN treatment (pups<br>given CAS not OVA): higher at 25, 50, 100 mg/ml methacholine but not<br>lower concentrations (~2-3 fold)                                        | No           |
| Fedulov<br>2005;<br>mouse;<br>OVA <sup>12</sup>  | Airway responsiveness<br>and long-term effect                                          | Methacholine<br>challenge | 2, 4, 6 weeks; offspring<br>challenged at days 13-15<br>with suboptimal protocol                                        | At 2 weeks higher at 25, 50, 100 mg/ml methacholine offspring of<br>asthmatic mothers, irrespective of offspring diet (~4-6 fold). Results not<br>ameliorated by non-CpG ODN treatment                                  | No           |
| Fedulov<br>2007;<br>mouse;<br>OVA <sup>13</sup>  | Airway responsiveness                                                                  | Methacholine test         | 0-2, 3-5, 6-8, 10-12 weeks<br>postnatally; offspring<br>challenged at 0, 3, 6 or 8<br>weeks with suboptimal<br>protocol | In challenged offspring of asthmatic mothers compared to challenged<br>controls, higher resistance at 0-2 (~4 fold), 3-5 (~3.5 fold), and 6-8 weeks<br>(~2.7 fold) but no difference at 10-12 weeks                     | No           |
| Fedulov<br>2011;<br>mouse;<br>OVA <sup>14</sup>  | Airway responsiveness                                                                  | Methacholine<br>challenge | After PD 15; offspring<br>challenged at 13-15 days<br>with suboptimal protocol                                          | OVA challenged offspring who received dendritic cell transplant had higher<br>responsiveness at 100 mg/ml than challenged recipient offspring of control<br>mothers (~2 fold)                                           | No           |
| Fedulov<br>2011;<br>mouse;<br>OVA <sup>14</sup>  | Airway responsiveness                                                                  | Methacholine<br>challenge | After PD 15; offspring<br>challenged at 13-15 days<br>with suboptimal protocol                                          | CAS challenged offspring who received dendritic cell transplant had higher<br>responsiveness at 100 mg/ml than OVA-challenged recipient offspring of<br>control mothers (~2 fold)                                       | No           |

|                                        |                                                    |                                       |                                                                                                                                   |                                                                                                                                                                                                                                                                                                                                                                                                                                                                                                       |    |
|----------------------------------------|----------------------------------------------------|---------------------------------------|-----------------------------------------------------------------------------------------------------------------------------------|-------------------------------------------------------------------------------------------------------------------------------------------------------------------------------------------------------------------------------------------------------------------------------------------------------------------------------------------------------------------------------------------------------------------------------------------------------------------------------------------------------|----|
| Fedulov 2011; mouse; OVA <sup>14</sup> | Airway responsiveness                              | Methacholine challenge                | After PD 15; offspring challenged at 13-15 days with suboptimal protocol                                                          | Higher responsiveness in dendritic cells recipients of asthmatic mothers (~1.5-2 fold). No differences for recipients of macrophages, CD4+ T cells or dendritic cell flow through                                                                                                                                                                                                                                                                                                                     | No |
| Fedulov 2011; mouse; OVA <sup>14</sup> | Lung immune response and BAL cells                 | BAL cell count and inflammatory index | After PD 15; offspring challenged at 13-15 days with suboptimal protocol                                                          | CAS challenged offspring who received dendritic cell transplant had higher eosinophil number (~4 fold) and a higher inflammatory index (~1.3 fold)                                                                                                                                                                                                                                                                                                                                                    | No |
| Feng 2012; rat; OVA <sup>15</sup>      | Airway responsiveness                              | Histamine challenge                   | 8 weeks (24 hr after last OVA challenge); offspring protocol began 6-8 weeks, with daily aerosol challenge on protocol days 14-21 | No difference at 0, 0.02, and 0.04 mg/ml concentrations but higher resistance at 0.08 (~1.3 fold), 0.16 (~1.1 fold) and 0.32 mg/ml (~1.05 fold)                                                                                                                                                                                                                                                                                                                                                       | No |
| Feng 2012; rat; OVA <sup>15</sup>      | Lung tissue morphology                             | H&E and light microscopy              | <i>Unclear</i> ; offspring protocol began 6-8 weeks, with daily aerosol challenge on protocol days 14-21                          | Pathophysiological changes around airways observed: mucous plug and swollen walls                                                                                                                                                                                                                                                                                                                                                                                                                     | No |
| Hamada 2003; mouse; OVA <sup>17</sup>  | Airway responsiveness (with antibody exposures)    | Methacholine challenge                | PD 15; offspring aerosol challenge PDs 12-14                                                                                      | No difference in airway responsiveness for groups given anti-IL4. There was a higher persistence of anti-IL-4 in CAS challenged offspring of asthmatic mothers, with a higher serum rat IgG (~13 fold) on day 3.<br><br>Neonatal mice of asthmatic mothers without pregnancy exposure but with added neonatal control IgG had higher airway responsiveness at 25-100 mg/ml (~1.6-3.2 fold) than challenged offspring of asthmatic mothers given anti-IL-4, or challenge offspring of control mothers. | No |
| Hamada 2003; mouse; OVA <sup>17</sup>  | Airway responsiveness (without antibody exposures) | Methacholine challenge                | PD 15; offspring aerosol challenge PDs 12-14                                                                                      | Higher in offspring of asthmatic mothers at 12-100 mg/ml (~2-2.5 fold), with or without pregnancy aerosol challenge, when offspring are also sensitised and challenged. In offspring sensitised and challenged with OVA or CAS, offspring of asthmatic mothers with more pregnancy aerosol challenges, had higher airway responsiveness at 12-100 mg/ml methacholine (~2-4 fold).                                                                                                                     | No |
| Hamada 2003; mouse; OVA <sup>17</sup>  | Lung histopathological changes                     | Inflammatory index                    | PD 15; offspring aerosol challenge PDs 12-14                                                                                      | Higher inflammation index (~3 fold) and goblet cell index (~2 fold) in OVA sensitised and challenged offspring of asthmatic mothers with and without OVA pregnancy exposures. Similar results were seen in CAS sensitised and challenged offspring of asthmatic mothers (~1.8 and 1.8-2.7-fold respectively) with and without pregnancy OVA exposures.                                                                                                                                                | No |

|                                                                       |                                         |                        |                                                                                                           |                                                                                                                                                                                                                                                                                                                                 |           |
|-----------------------------------------------------------------------|-----------------------------------------|------------------------|-----------------------------------------------------------------------------------------------------------|---------------------------------------------------------------------------------------------------------------------------------------------------------------------------------------------------------------------------------------------------------------------------------------------------------------------------------|-----------|
| Hubeau 2006; mouse; OVA <sup>17</sup>                                 | Airway responsiveness                   | Methacholine challenge | PD 15; offspring aerosol challenged days 12-14                                                            | Airways were more responsive at 12, 25, 50, 100, mg/ml methacholine in offspring of DO11.1 T cell recipient asthmatic mothers challenged with OVA (~2.4-5 fold) or CAS (~1.4-3.3 fold). Offspring of BALC/c T cell recipient asthmatic mothers had no difference in airway hyperresponsiveness when challenged with CAS.        | No        |
| Hubeau 2007; mouse; OVA <sup>21</sup>                                 | Airway responsiveness                   | Methacholine challenge | PD 15 offspring aerosol challenged days 12-14                                                             | Asthmatic offspring had higher airway responsiveness at 10, 25, 50, and 100 mg/ml methacholine (~3-5 fold). No differences in anti-CTLA-4 or anti-GITR pre-treated offspring of asthmatic mothers                                                                                                                               | No        |
| Lebold; mouse; HDM <sup>22</sup>                                      | Airway responsiveness                   | Serotonin challenge    | 8 weeks; offspring challenged at 8 weeks + 14-17 days                                                     | Higher responsiveness in challenged offspring of asthmatic mothers than challenged and unchallenged offspring of control mothers (~1.1-1.3 fold).                                                                                                                                                                               | No        |
| Leme 2006; mouse; OVA <sup>23</sup>                                   | Airway responsiveness                   | Methacholine challenge | PDs 16-17; offspring challenged days 13-15                                                                | Higher responsiveness at 12-100 mg/ml methacholine when born to asthmatic mothers or nursed by asthmatic mothers (~2-5 fold). Higher responsiveness for CAS challenged pups instead of OVA (~2-5.5 fold) and if adoptive nursing is delayed by 3 days (~2-4 fold).                                                              | No        |
| Leme 2006; mouse; OVA <sup>23</sup>                                   | Lung histopathology                     | Inflammation index     | PDs 16-17; offspring challenged days 13-15                                                                | Higher lung inflammation index when born to asthmatic mothers or nursed by asthmatic mothers (index 2.3-3.8 compared to 0 in control). Same results for CAS challenged pups instead of OVA.                                                                                                                                     | No        |
| Pucheu-Haston 2010 mouse; Metarhizium anisopliae fungus <sup>32</sup> | Airway responsiveness                   | Methacholine challenge | PD 71; offspring challenges (all generations) on PDs 49, 62, and 69                                       | In house dust mite challenged males, at 12.5 and 25 non-specified units of methacholine, responsiveness was higher than male Hank's buffered saline solution controls (~2.1-3.1 fold). At 25 responsiveness was also higher than females (~1.4 fold).                                                                           | Yes       |
| Pulczinski 2021; mouse; HDM <sup>33</sup>                             | Airway responsiveness - all generations | Methacholine challenge | 6 weeks + 23 days; offspring challenge on 6 weeks + 14, 18, and 21 days                                   | In house dust mite challenged offspring of asthmatic mothers, airway responsiveness was higher in generations 1 (~1.6 fold) and 3 (~1.7 fold) but not generation 2 when compared to HDM challenged offspring of control mothers. No difference between offspring of controls and asthmatics when offspring were not challenged. | Male only |
| Size outcomes                                                         |                                         |                        |                                                                                                           |                                                                                                                                                                                                                                                                                                                                 |           |
| Schwartzter 2015; mouse;                                              | Developmental growth trajectories       | Growth measurements    | PDs 4-16, adult weight at 10 weeks; offspring not challenged. Final challenge was maternal on day 17.5 of | Pup length higher in offspring of asthmatic mothers at all postnatal time points: days 4, 6, 8, 10, 12, 14, 16 (~1.05 fold). Pup weight in offspring of asthmatic mothers higher at all postnatal time points: days 4, 6, 8, 10, 12,                                                                                            | No        |

|                                                                                                                                                                                                                                                                                                                                                                                                                                                                                                                                                                                                                                                                                                                                                                                                                                                                                                                                     |  |  |           |                                                 |  |
|-------------------------------------------------------------------------------------------------------------------------------------------------------------------------------------------------------------------------------------------------------------------------------------------------------------------------------------------------------------------------------------------------------------------------------------------------------------------------------------------------------------------------------------------------------------------------------------------------------------------------------------------------------------------------------------------------------------------------------------------------------------------------------------------------------------------------------------------------------------------------------------------------------------------------------------|--|--|-----------|-------------------------------------------------|--|
| OVA <sup>34</sup>                                                                                                                                                                                                                                                                                                                                                                                                                                                                                                                                                                                                                                                                                                                                                                                                                                                                                                                   |  |  | gestation | 14, 16 (~1.2 fold). Adult weight: no difference |  |
| <p> <math>\alpha</math>-T = alpha tocopherol, BAL = bronchoalveolar lavage, CAS = casein, CCL = C-C motif chemokine ligand, CFA = complete Freund's adjuvant, DC = dendritic cell, ELISA = enzyme-linked immunosorbent assay, FcRn = neonatal Fc receptor for IgG, GD = day of gestation, GM-CSF = Granulocyte-macrophage colony-stimulating factor, GRO = growth-regulated oncogene, HDM = house dust mite, H&amp;E = haematoxylin and eosin stain, IFN = interferon, Ig = immunoglobulin, IL = interleukin, i.v. = intravenous, MACA = Metarhizium anisopliae crude antigen, M. vaccae = mycobacterium vaccae, OVA = ovalbumin, OVA-Al(OH)<sub>3</sub> = ovalbumin with aluminium hydroxide adjuvant, PD = postnatal day, RT-qPCR = real time quantitative polymerase chain reaction, TNF = tumour necrosis factor, T-reg = regulatory T cell, TSLP = Thymic stromal lymphopoietin, <math>\gamma</math>-T = gamma tocopherol </p> |  |  |           |                                                 |  |

Table S8 - Quality assessment – ARRIVE 2.0 Essential 10

| Table S7 - Quality assessment – ARRIVE 2.0 Essential 10 |    |    |    |    |    |    |    |    |    |   |    |    |    |    |    |    |    |    |    |    |     |     |                 |
|---------------------------------------------------------|----|----|----|----|----|----|----|----|----|---|----|----|----|----|----|----|----|----|----|----|-----|-----|-----------------|
| Study ID                                                | 1a | 1b | 2a | 2b | 3a | 3b | 3c | 4a | 4b | 5 | 6a | 6b | 7a | 7b | 8a | 8b | 9a | 9b | 9c | 9d | 10a | 10b | Total of 22 (%) |
| <b>Before ARRIVE guidelines</b>                         |    |    |    |    |    |    |    |    |    |   |    |    |    |    |    |    |    |    |    |    |     |     |                 |
| Herz 2001 <sup>19</sup>                                 | ✓  | ✓  | ✗  | ✗  | ✗  | ✗  | ✗  | ✗  | ✗  | ✗ | ✓  | ✓  | ✗  | ✗  | ✗  | ✗  | ✓  | ✓  | ✗  | ✓  | ✗   | --  | 7 (31.8)        |
| Barrett 2003 <sup>7</sup>                               | ✓  | ✓  | ✓  | ✗  | ✗  | ✓  | ✓  | ✗  | ✓  | ✗ | ✓  | ✓  | ✗  | ✗  | ✗  | ✓  | ✓  | ✓  | ✓  | ✓  | ✗   | --  | 13 (59.1)       |
| Hamada 2003 <sup>17</sup>                               | ✓  | ✓  | ✗  | ✗  | ✗  | ✗  | ✗  | ✗  | ✓  | ✗ | ✓  | ✓  | ✓  | ✗  | ✗  | ✓  | ✓  | ✓  | ✓  | ✓  | ✓   | --  | 12 (54.5)       |
| Fedulov 2005 <sup>12</sup>                              | ✓  | ✓  | ✓  | ✗  | ✓  | ✗  | ✗  | ✗  | ✗  | ✗ | ✓  | ✓  | ✓  | ✗  | ✗  | ✗  | ✓  | ✓  | ✓  | ✓  | ✗   | --  | 11 (50.0)       |
| Hubeau 2006 <sup>20</sup>                               | ✓  | ✓  | ✗  | ✗  | ✗  | ✗  | ✗  | ✗  | ✗  | ✗ | ✓  | ✓  | ✓  | ✗  | ✗  | ✗  | ✓  | ✓  | ✓  | ✓  | ✗   | --  | 9 (40.9)        |
| Leme 2006 <sup>23</sup>                                 | ✓  | ✓  | ✗  | ✗  | ✗  | ✗  | ✗  | ✗  | ✓  | ✗ | ✓  | ✓  | ✓  | ✗  | ✗  | ✓  | ✓  | ✓  | ✓  | ✓  | ✓   | --  | 12 (54.5)       |
| Fedulov 2011 <sup>14</sup>                              | ✓  | ✓  | ✗  | ✗  | ✗  | ✗  | ✓  | ✗  | ✗  | ✗ | ✓  | ✓  | ✓  | ✓  | ✗  | ✗  | ✓  | ✓  | ✗  | ✓  | ✗   | ✗   | 10 (45.5)       |
| Hubeau 2007 <sup>21</sup>                               | ✓  | ✓  | ✗  | ✗  | ✗  | ✗  | ✗  | ✗  | ✗  | ✗ | ✓  | ✓  | ✓  | ✗  | ✗  | ✗  | ✓  | ✓  | ✓  | ✓  | ✗   | --  | 9 (40.9)        |
| Matson 2007 <sup>26</sup>                               | ✓  | ✓  | ✗  | ✗  | ✗  | ✗  | ✗  | ✗  | ✓  | ✗ | ✓  | ✓  | ✓  | ✗  | ✗  | ✓  | ✓  | ✓  | ✓  | ✓  | ✗   | --  | 11 (50.0)       |
| Akkoc 2008 <sup>4</sup>                                 | ✓  | ✓  | ✗  | ✗  | ✗  | ✗  | ✗  | ✗  | ✓  | ✗ | ✓  | ✓  | ✓  | ✗  | ✓  | ✗  | ✓  | ✓  | ✓  | ✓  | ✗   | --  | 11 (50.0)       |
| Babayigit 2008 <sup>5</sup>                             | ✓  | ✓  | ✓  | ✗  | ✓  | ✓  | ✓  | ✗  | ✓  | ? | ✓  | ✓  | ✓  | ✗  | ✓  | ✗  | ✓  | ✓  | ✓  | ✓  | ✓   | --  | 16 (72.7)       |
| Fedulov 2007 <sup>13</sup>                              | ✓  | ✓  | ✗  | ✗  | ✗  | ✗  | ✗  | ✗  | ✓  | ✗ | ✓  | ✓  | ✓  | ✗  | ✓  | ✓  | ✓  | ✓  | ✓  | ✓  | ✗   | --  | 12 (54.5)       |
| Matson 2009 <sup>27</sup>                               | ✓  | ✓  | ✗  | ✗  | ✗  | ✗  | ✗  | ✗  | ✓  | ✗ | ✓  | ✓  | ✓  | ✗  | ✗  | ✗  | ✓  | ✓  | ✓  | ✓  | ✗   | --  | 10 (45.5)       |
| Puceu-Haston 2009 <sup>31</sup>                         | ✓  | ✓  | ✓  | ✗  | ✓  | ✗  | ✓  | ✗  | ✓  | ✗ | ✓  | ✓  | ✓  | ✗  | ✓  | ✓  | ✓  | ✓  | ✓  | ✓  | ✓   | --  | 16 (72.7)       |
| <b>ARRIVE 1.0 Guidelines introduced in 2010</b>         |    |    |    |    |    |    |    |    |    |   |    |    |    |    |    |    |    |    |    |    |     |     |                 |
| Matson 2010 <sup>28</sup>                               | ✓  | ✓  | ✗  | ✗  | ✗  | ✗  | ✗  | ✗  | ✓  | ✓ | ✓  | ✓  | ✓  | ✗  | ✗  | ✓  | ✓  | ✓  | ✓  | ✓  | ✗   | --  | 12 (54.5)       |
| Nakata 2010 <sup>30</sup>                               | ✓  | ✓  | ✗  | ✗  | ✗  | ✗  | ✗  | ✗  | ✗  | ✗ | ✓  | ✓  | ✗  | ✗  | ✗  | ✗  | ✗  | ✓  | ✗  | ✗  | ✗   | --  | 5 (22.7)        |
| Puceu-Haston 2010 <sup>32</sup>                         | ✓  | ✓  | ✗  | ✗  | ✗  | ✗  | ✗  | ✗  | ✓  | ✗ | ✓  | ✓  | ✓  | ✗  | ✗  | ✓  | ✓  | ✓  | ✓  | ✓  | ✗   | --  | 11 (50.)        |
| Allina 2011 <sup>5</sup>                                | ✓  | ✓  | ✗  | ✗  | ✗  | ✗  | ✗  | ✗  | ✓  | ✗ | ✓  | ✓  | ✗  | ✓  | ✓  | ✗  | ✓  | ✓  | ✓  | ✓  | ✓   | --  | 12 (54.05)      |
| Wu 2011 <sup>40</sup>                                   | ✓  | ✓  | ✓  | ✗  | ✓  | ✗  | ?  | ✗  | ✗  | ✓ | ✓  | ✓  | ✗  | ✗  | ✗  | ✗  | ✓  | ✓  | ✗  | ✓  | ✓   | --  | 11 (50.0)       |
| Carpe 2012 <sup>8</sup>                                 | ✓  | ✓  | ✗  | ✗  | ✗  | ✗  | ✗  | ✗  | ✗  | ✗ | ✓  | ✓  | ✗  | ✗  | ✗  | ✗  | ✓  | ✓  | ✓  | ✓  | ✗   | --  | 8 (36.4)        |

|                                                                 |             |             |              |            |              |             |              |            |              |             |             |             |              |             |              |              |              |             |              |              |              |            |           |
|-----------------------------------------------------------------|-------------|-------------|--------------|------------|--------------|-------------|--------------|------------|--------------|-------------|-------------|-------------|--------------|-------------|--------------|--------------|--------------|-------------|--------------|--------------|--------------|------------|-----------|
| Feng 2012 <sup>15</sup>                                         | ✓           | ✓           | ✓            | ✗          | ✓            | ✗           | ✓            | ✓          | ✗            | ✓           | ✓           | ✓           | ✗            | ✗           | ✗            | ✗            | ✓            | ✓           | ✓            | ✓            | ✗            | --         | 13 (59.1) |
| Gerhold 2012 <sup>16</sup>                                      | ✓           | ✓           | ✗            | ✗          | ✗            | ✗           | ✓            | ✗          | ✓            | ✗           | ✓           | ✓           | ✓            | ✗           | ✓            | ✓            | ✓            | ✓           | ✓            | ✓            | ✗            | --         | 13 (59.1) |
| Abdala-Valencia 2014 <sup>2</sup>                               | ✓           | ✓           | ✗            | ✗          | ✓            | ✓           | ✗            | ✗          | ✗            | ✗           | ✓           | ✓           | ✓            | ✗           | ✓            | ✗            | ✓            | ✓           | ✓            | ✓            | ✓            | --         | 13 (59.1) |
| Heller 2014 <sup>18</sup>                                       | ✓           | ✓           | ✓            | ✗          | ✓            | ✗           | ✓            | ✗          | ✗            | ✗           | ✓           | ✓           | ✗            | ✗           | ✗            | ✗            | ✓            | ✓           | ✓            | ✓            | ✗            | --         | 11 (50.0) |
| Lopez-Exposito 2015 <sup>25</sup>                               | ✓           | ✓           | ✗            | ✗          | ✗            | ✗           | ✗            | ✗          | ✗            | ✗           | ✓           | ✓           | ✓            | ✗           | ✗            | ✗            | ✓            | ✓           | ✗            | ✓            | ✓            | --         | 9 (40.9)  |
| Schwartzter 2015 <sup>34</sup>                                  | ✓           | ✓           | ✓            | ✗          | ✗            | ✗           | ✗            | ✗          | ✓            | ✗           | ✓           | ✓           | ✓            | ✗           | ✓            | ✗            | ✓            | ✓           | ✓            | ✓            | ✗            | --         | 12 (54.5) |
| Abdala-Valencia 2016 <sup>3</sup>                               | ✓           | ✓           | ✗            | ✗          | ✗            | ✗           | ✗            | ✗          | ✗            | ✗           | ✓           | ✓           | ✓            | ✗           | ✓            | ✗            | ✓            | ✓           | ✓            | ✓            | ✗            | --         | 10 (45.5) |
| Clifton 2016 <sup>10</sup>                                      | ✓           | ✓           | ✓            | ✓          | ✓            | ✓           | ✓            | ✗          | ✓            | ✗           | ✓           | ✓           | ✓            | ?           | ✓            | ✓            | ✓            | ✓           | ✓            | ✓            | ✓            | --         | 18 (81.8) |
| Schwartzter 2017 <sup>35</sup>                                  | ✓           | ✓           | ✓            | ✗          | ✗            | ✗           | ✗            | ✗          | ✓            | ✗           | ✓           | ✓           | ✓            | ✓           | ✓            | ✗            | ✓            | ✓           | ✓            | ✓            | ✓            | --         | 14 (63.6) |
| Vogel Ciernia 2018 <sup>38</sup>                                | ✓           | ✓           | ✗            | ✗          | ✓            | ✓           | ✓            | ✗          | ✓            | ✗           | ✓           | ✓           | ?            | ✗           | ✓            | ✗            | ✓            | ✓           | ✓            | ✓            | ✗            | --         | 13 (59.1) |
| Clifton 2019 <sup>11</sup>                                      | ✓           | ✓           | ✓            | ✗          | ✓            | ✓           | ✓            | ✗          | ✓            | ✗           | ✓           | ✓           | ✓            | ✗           | ✓            | ✓            | ✓            | ✓           | ✓            | ✓            | ✓            | --         | 17 (77.3) |
| Lenz 2019 <sup>24</sup>                                         | ✓           | ✓           | ✗            | ✗          | ✗            | ✗           | ✓            | ✗          | ✓            | ✓           | ✓           | ✓           | ✓            | ✓           | ✓            | ✗            | ✓            | ✓           | ✓            | ✓            | ✗            | ✓          | 15 (68.2) |
| Wooldridge 2019 <sup>39</sup>                                   | ✓           | ✓           | ✓            | ✗          | ✓            | ✓           | ✓            | ✗          | ✓            | ✓           | ✓           | ✓           | ✓            | ✓           | ✓            | ✓            | ✗            | ✓           | ✓            | ✓            | ✓            | ✓          | 18 (81.8) |
| <b>ARRIVE 2.0 Guidelines introduced 2020</b>                    |             |             |              |            |              |             |              |            |              |             |             |             |              |             |              |              |              |             |              |              |              |            |           |
| Sodemann 2020 <sup>36</sup>                                     | ✓           | ✓           | ✗            | ✗          | ✗            | ✗           | ✗            | ✗          | ✓            | ✓           | ✓           | ✓           | ✓            | ✗           | ✗            | ✗            | ✓            | ✓           | ✓            | ✓            | ✗            | --         | 11 (50.0) |
| Church 2021 <sup>9</sup>                                        | ✓           | ✓           | ✓            | ✗          | ✓            | ✓           | ✓            | ✗          | ✓            | ✓           | ✓           | ✓           | ✓            | ✓           | ✓            | ✓            | ✓            | ✓           | ✓            | ✓            | ✓            | --         | 19 (86.4) |
| Meakin 2021 <sup>29</sup>                                       | ✓           | ✓           | ✓            | ✗          | --           | ✗           | ✓            | ✗          | --           | --          | ✓           | ✓           | ✗            | ✗           | ✓            | ✗            | ✓            | ✓           | --           | ✓            | ✓            | --         | 11 (50.0) |
| Pulczynski 2021 <sup>33</sup>                                   | ✓           | ✓           | ✗            | ✗          | ✓            | ✗           | ✓            | ✗          | ✓            | ✗           | ✓           | ✓           | ✓            | ✗           | ✓            | ✓            | ✓            | ✓           | ✓            | ✓            | ✗            | --         | 14 (63.6) |
| Lebold 2022 <sup>22</sup>                                       | ✓           | ✓           | ✗            | ✗          | ✓            | ✗           | ✗            | ✗          | ✓            | ✗           | ✓           | ✓           | ✓            | ✗           | ✓            | ✓            | ✓            | ✓           | ✓            | ✓            | ✗            | --         | 13 (59.1) |
| Tamayo 2022 <sup>37</sup>                                       | ✓           | ✓           | ✓            | ✗          | ✗            | ✗           | ✓            | ✗          | ✓            | ✗           | ✓           | ✓           | ✓            | ✓           | ✓            | ✓            | ✓            | ✓           | ✓            | ✓            | ✓            | ✓          | 17 (77.3) |
| Total of 39 (%)                                                 | 39<br>(100) | 39<br>(100) | 15<br>(38.5) | 1<br>(2.6) | 14<br>(35.9) | 8<br>(20.5) | 16<br>(41.0) | 1<br>(2.6) | 25<br>(64.1) | 7<br>(17.9) | 39<br>(100) | 39<br>(100) | 29<br>(74.4) | 7<br>(17.9) | 20<br>(51.3) | 15<br>(38.5) | 38<br>(97.4) | 39<br>(100) | 33<br>(84.6) | 38<br>(97.4) | 15<br>(38.5) | 2<br>(5.1) |           |
| ✓ = Yes; ✗ = No; ? = Unclear; -- = N/A. Totals are sum of "Yes" |             |             |              |            |              |             |              |            |              |             |             |             |              |             |              |              |              |             |              |              |              |            |           |

Table S9 - Quality assessment – ARRIVE 2.0 Recommended Set

| Table S7 - Quality assessment – ARRIVE 2.0 Recommended Set |    |     |     |    |    |    |     |     |     |     |     |    |    |    |     |     |                 |
|------------------------------------------------------------|----|-----|-----|----|----|----|-----|-----|-----|-----|-----|----|----|----|-----|-----|-----------------|
| Study ID                                                   | 11 | 12a | 12b | 13 | 14 | 15 | 16a | 16b | 16c | 17a | 17b | 18 | 19 | 20 | 21a | 21b | Total of 16 (%) |
| <b>Before ARRIVE guidelines</b>                            |    |     |     |    |    |    |     |     |     |     |     |    |    |    |     |     |                 |
| Herz 2001 <sup>19</sup>                                    | x  | ✓   | x   | ✓  | x  | x  | x   | x   | x   | x   | x   | x  | x  | x  | x   | ✓   | 3 (18.8)        |
| Barrett 2003 <sup>7</sup>                                  | x  | ✓   | ✓   | ✓  | ✓  | ✓  | ✓   | x   | x   | ✓   | x   | ✓  | x  | x  | x   | x   | 8 (50.0)        |
| Hamada 2003 <sup>17</sup>                                  | x  | ✓   | x   | ✓  | ✓  | ✓  | x   | x   | x   | ✓   | ✓   | ✓  | x  | x  | x   | ✓   | 8 (50.0)        |
| Fedulov 2005 <sup>12</sup>                                 | ✓  | ✓   | ✓   | ✓  | ✓  | ✓  | ✓   | x   | x   | ✓   | ✓   | ✓  | x  | x  | ✓   | ✓   | 12 (75.0)       |
| Hubeau 2006 <sup>20</sup>                                  | x  | ✓   | ✓   | ✓  | ✓  | ✓  | x   | x   | x   | ✓   | x   | ✓  | x  | x  | x   | ✓   | 8 (50.0)        |
| Leme 2006 <sup>23</sup>                                    | x  | ✓   | ✓   | ✓  | ✓  | ✓  | x   | x   | x   | ✓   | x   | ✓  | x  | x  | ✓   | ✓   | 9 (56.3)        |
| Fedulov 2011 <sup>14</sup>                                 | x  | ✓   | x   | ✓  | ✓  | x  | x   | x   | x   | ✓   | ✓   | ✓  | x  | x  | ✓   | ✓   | 8 (50.0)        |
| Hubeau 2007 <sup>21</sup>                                  | x  | ✓   | ✓   | ✓  | ✓  | x  | x   | x   | x   | ✓   | x   | x  | x  | x  | ✓   | ✓   | 7 (43.8)        |
| Matson 2007 <sup>26</sup>                                  | x  | ✓   | ✓   | ✓  | x  | ✓  | ✓   | x   | x   | ✓   | x   | ✓  | x  | x  | ✓   | ✓   | 9 (56.3)        |
| Akkoc 2008 <sup>4</sup>                                    | ✓  | ✓   | x   | ✓  | ✓  | x  | x   | x   | x   | ✓   | x   | ✓  | x  | ✓  | x   | ✓   | 8 (50.0)        |
| Babayigit 2008 <sup>6</sup>                                | ✓  | ✓   | ✓   | ✓  | ✓  | ✓  | x   | x   | x   | ✓   | ✓   | ✓  | x  | x  | x   | x   | 9 (56.3)        |
| Fedulov 2007 <sup>13</sup>                                 | ✓  | ✓   | ✓   | ✓  | ✓  | ✓  | x   | x   | x   | ✓   | ✓   | ✓  | x  | x  | x   | ✓   | 10 (62.5)       |
| Matson 2009 <sup>27</sup>                                  | x  | ✓   | ✓   | ✓  | x  | ✓  | x   | x   | x   | ✓   | x   | ✓  | x  | x  | ✓   | ✓   | 8 (50.0)        |
| Pucheu-Haston 2009 <sup>31</sup>                           | ✓  | ✓   | x   | ✓  | ✓  | ✓  | ✓   | x   | x   | ✓   | ✓   | ✓  | x  | x  | ✓   | ✓   | 11 (68.8)       |
| <b>ARRIVE 1.0 Guidelines introduced 2010</b>               |    |     |     |    |    |    |     |     |     |     |     |    |    |    |     |     |                 |
| Matson 2010 <sup>28</sup>                                  | x  | ✓   | x   | ✓  | x  | ✓  | ✓   | x   | x   | ✓   | x   | ✓  | x  | x  | ✓   | ✓   | 8 (50.0)        |
| Nakata 2010 <sup>30</sup>                                  | x  | ✓   | x   | ✓  | ✓  | x  | x   | x   | x   | ✓   | x   | ✓  | x  | x  | x   | ✓   | 6 (37.5)        |
| Pucheu-Haston 2010 <sup>32</sup>                           | ✓  | ✓   | ✓   | ✓  | x  | ✓  | ✓   | x   | x   | ✓   | ✓   | ✓  | x  | x  | ✓   | ✓   | 11 (68.8)       |
| Allina 2011 <sup>5</sup>                                   | ✓  | ✓   | x   | ✓  | ✓  | ✓  | ✓   | x   | x   | ✓   | x   | ?  | x  | x  | ✓   | ✓   | 9 (56.3)        |
| Wu 2011 <sup>40</sup>                                      | ✓  | ✓   | x   | ✓  | ✓  | x  | x   | x   | x   | ✓   | x   | x  | x  | x  | ✓   | ✓   | 7 (43.8)        |
| Carpe 2012 <sup>8</sup>                                    | x  | ✓   | ✓   | ✓  | ✓  | x  | ✓   | x   | x   | ✓   | ✓   | ✓  | x  | x  | ✓   | ✓   | 10 (62.5)       |
| Feng 2012 <sup>15</sup>                                    | ✓  | ✓   | x   | ✓  | ✓  | x  | ✓   | x   | x   | ✓   | x   | x  | x  | x  | ✓   | ✓   | 8 (50.0)        |
| Gerhold 2012 <sup>16</sup>                                 | ✓  | ✓   | ✓   | ✓  | x  | ✓  | x   | x   | x   | ✓   | x   | ✓  | x  | ✓  | ✓   | ✓   | 10 (62.5)       |
| Abdala-Valencia 2014 <sup>2</sup>                          | ✓  | ✓   | ✓   | ✓  | ✓  | x  | x   | x   | x   | ✓   | x   | ✓  | x  | ✓  | ✓   | ✓   | 10 (62.5)       |



|                                                                 |              |               |              |              |              |              |              |         |         |              |              |              |         |              |              |              |           |
|-----------------------------------------------------------------|--------------|---------------|--------------|--------------|--------------|--------------|--------------|---------|---------|--------------|--------------|--------------|---------|--------------|--------------|--------------|-----------|
| Heller 2014 <sup>18</sup>                                       | ✘            | ✓             | ✓            | ✓            | ✓            | ✘            | ✓            | ✘       | ✘       | ✓            | ✘            | ✓            | ✘       | ✘            | ✘            | ✘            | 7 (43.8)  |
| Lopez-Exposito 2015 <sup>25</sup>                               | ✘            | ✓             | ✘            | ✘            | ✘            | ✘            | ✘            | ✘       | ✘       | ✓            | ✘            | ✘            | ✘       | ✓            | ✘            | ✓            | 4 (25.0)  |
| Schwartz 2015 <sup>34</sup>                                     | ✓            | ✓             | ✓            | ✓            | ✓            | ✓            | ✓            | ✘       | ✘       | ✓            | ✓            | ✓            | ✘       | ✓            | ✓            | ✓            | 13 (81.3) |
| Abdala-Valencia 2016 <sup>3</sup>                               | ✘            | ✓             | ✓            | ✓            | ✓            | ✘            | ✘            | ✘       | ✘       | ✓            | ✘            | ✓            | ✘       | ✘            | ✓            | ✓            | 8 (50.0)  |
| Clifton 2016 <sup>10</sup>                                      | ✓            | ✓             | ✓            | ✓            | ✓            | ✓            | ✓            | ✓       | ✘       | ✓            | ✓            | ✓            | ✘       | ✓            | ✓            | ✓            | 14 (87.5) |
| Schwartz 2017 <sup>35</sup>                                     | ✓            | ✓             | ✓            | ✓            | ✓            | ✓            | ✓            | ✘       | ✘       | ✓            | ✓            | ✓            | ✘       | ✘            | ✓            | ✓            | 12 (75.0) |
| Vogel Ciernia 2018 <sup>38</sup>                                | ✓            | ✓             | ✓            | ✓            | ✓            | ✓            | ✓            | ✘       | ✘       | ✓            | ✘            | ✓            | ✘       | ✓            | ✓            | ✓            | 12 (75.0) |
| Clifton 2019 <sup>11</sup>                                      | ✓            | ✓             | ✓            | ✓            | ✓            | ✓            | ✓            | ✓       | ✘       | ✓            | ✓            | ✓            | ✘       | ✘            | ✘            | ✓            | 12 (75.0) |
| Lenz 2019 <sup>24</sup>                                         | ✓            | ✓             | ✘            | ✓            | ✓            | ✓            | ✓            | ✘       | ✘       | ✓            | ✘            | ✓            | ✘       | ✓            | ✓            | ✓            | 11 (68.8) |
| Wooldridge 2019 <sup>39</sup>                                   | ✓            | ✓             | ✓            | ✓            | ✓            | ✓            | ✘            | ✓       | ✘       | ✓            | ✓            | ✓            | ✘       | ✘            | ✓            | ✓            | 12 (75.0) |
| <b>ARRIVE 2.0 Guidelines introduced 2020</b>                    |              |               |              |              |              |              |              |         |         |              |              |              |         |              |              |              |           |
| Sodemann 2020 <sup>36</sup>                                     | ✘            | ✓             | ✓            | ✓            | ✘            | ✘            | ✓            | ✘       | ✘       | ✓            | ✘            | ✘            | ✘       | ✓            | ✓            | ✓            | 8 (50.0)  |
| Church 2021 <sup>9</sup>                                        | ✓            | ✓             | ✓            | ✓            | ✓            | ✓            | ✓            | ✘       | ✘       | ✓            | ✓            | ✓            | ✘       | ✓            | ✘            | ✓            | 12 (75.0) |
| Meakin 2021 <sup>29</sup>                                       | ✓            | ✓             | ✓            | ✓            | ✓            | --           | ✓            | --      | --      | ✓            | --           | ✓            | ✘       | ✘            | ✓            | ✓            | 10 (62.5) |
| Pulczynski 2021 <sup>33</sup>                                   | ✓            | ✓             | ✓            | ✓            | ✓            | ✓            | ✓            | ✘       | ✘       | ✓            | ✘            | ✓            | ✘       | ✓            | ✓            | ✓            | 12 (75.0) |
| Lebold 2022 <sup>22</sup>                                       | ✓            | ✓             | ✘            | ✓            | ✓            | ✓            | ✓            | ✘       | ✘       | ✓            | ✘            | ✓            | ✘       | ✓            | ✘            | ✓            | 10 (62.5) |
| Tamayo 2022 <sup>37</sup>                                       | ✓            | ✓             | ✓            | ✓            | ✓            | ✓            | ✓            | ✘       | ✘       | ✓            | ✓            | ✓            | ✘       | ✘            | ✓            | ✓            | 12 (75.0) |
| Total of 39 (%)                                                 | 23<br>(59.0) | 39<br>(100.0) | 26<br>(66.7) | 38<br>(97.4) | 31<br>(79.5) | 25<br>(64.1) | 22<br>(56.4) | 3 (7.7) | 0 (0.0) | 38<br>(97.4) | 15<br>(38.5) | 32<br>(82.1) | 0 (0.0) | 12<br>(30.8) | 26<br>(66.7) | 36<br>(92.3) |           |
| ✓ = Yes; ✘ = No; ? = Unclear; -- = N/A. Totals are sum of "Yes" |              |               |              |              |              |              |              |         |         |              |              |              |         |              |              |              |           |

## References

1. Percie du Sert N, Hurst V, Ahluwalia A, *et al.* The ARRIVE guidelines 2.0: updated guidelines for reporting animal research. *Br J Pharmacol* 2020;**177**: 3617-3624.
2. Abdala-Valencia H, Berdnikovs S, Soveg FW, Cook-Mills JM. alpha-Tocopherol supplementation of allergic female mice inhibits development of CD11c(+)CD11b(+) dendritic cells in utero and allergic inflammation in neonates. *Am J Physiol Lung Cell Mol Physiol* 2014;**307**: L482-496.
3. Abdala-Valencia H, Soveg F, Cook-Mills JM. gamma-Tocopherol supplementation of allergic female mice augments development of CD11c(+)CD11b(+) dendritic cells in utero and allergic inflammation in neonates. *Am J Physiol Lung Cell Mol Physiol* 2016;**310**: L759-771.
4. Akkoc T, Eifan AO, Ozdemir C, *et al.* Mycobacterium vaccae immunization to OVA sensitized pregnant BALB/c mice suppressed placental and postnatal IL-5 and inducing IFN-gamma secretion. *Immunopharmacol Immunotoxicol* 2008;**30**: 1-11.
5. Allina J, Grabowski J, Doherty-Lyons S, *et al.* Maternal allergy acts synergistically with cigarette smoke exposure during pregnancy to induce hepatic fibrosis in adult male offspring. *J Immunotoxicol* 2011;**8**: 258-264.
6. Babayigit A, Olmez D, Erbil G, *et al.* Histopathologic changes of the lung in newborn mice born from asthmatic mothers. *Türkiye Klinikleri J Med Sci* 2008;**28**: 606-611.
7. Barrett EG, Rudolph K, Bowen LE, Bice DE. Parental allergic status influences the risk of developing allergic sensitization and an asthmatic-like phenotype in canine offspring. *Immunology* 2003;**110**: 493-500.
8. Carpe N, Mandeville I, Kho AT, *et al.* Maternal allergen exposure reprograms the developmental lung transcriptome in atopic and normoresponsive rat pups. *Am J Physiol Lung Cell Mol Physiol* 2012;**303**: L899-911.
9. Church JS, Tamayo JM, Ashwood P, Schwartz JJ. Repeated allergic asthma in early versus late pregnancy differentially impacts offspring brain and behavior development. *Brain Behav Immun* 2021;**93**: 66-79.
10. Clifton VL, Moss TJ, Wooldridge AL, *et al.* Development of an experimental model of maternal allergic asthma during pregnancy. *J Physiol* 2016;**594**: 1311-1325.
11. Clifton VL, McDonald M, Morrison JL, *et al.* Placental glucocorticoid receptor isoforms in a sheep model of maternal allergic asthma. *Placenta* 2019;**83**: 33-36.
12. Fedulov A, Silverman E, Xiang Y, Leme A, Kobzik L. Immunostimulatory CpG oligonucleotides abrogate allergic susceptibility in a murine model of maternal asthma transmission. *J Immunol* 2005;**175**: 4292-4300.
13. Fedulov AV, Leme AS, Kobzik L. Duration of allergic susceptibility in maternal transmission of asthma risk. *Am J Reprod Immunol* 2007;**58**: 120-128.
14. Fedulov AV, Kobzik L. Allergy risk is mediated by dendritic cells with congenital epigenetic changes. *Am J Respir Cell Mol Biol* 2011;**44**: 285-291.
15. Feng JT, Wu XM, Li XZ, Zou YQ, Qin L, Hu CP. Transformation of adrenal medullary chromaffin cells increases asthmatic susceptibility in pups from allergen-sensitized rats. *Respir Res* 2012;**13**: 99.
16. Gerhold K, Avagyan A, Reichert E, *et al.* Prenatal allergen exposures prevent allergen-induced sensitization and airway inflammation in young mice. *Allergy* 2012;**67**: 353-361.
17. Hamada K, Suzaki Y, Goldman A, *et al.* Allergen-independent maternal transmission of asthma susceptibility. *J Immunol* 2003;**170**: 1683-1689.

18. Heller MC, Lee-Fowler TM, Liu H, Cohn LA, Reiner CR. Neonatal aerosol exposure to Bermuda grass allergen prevents subsequent induction of experimental allergic feline asthma: evidence for establishing early immunologic tolerance. *Vet Immunol Immunopathol* 2014;**160**: 20-25.
19. Herz U, Joachim R, Ahrens B, Scheffold A, Radbruch A, Renz H. Allergic sensitization and allergen exposure during pregnancy favor the development of atopy in the neonate. *Int Arch Allergy Immunol* 2001;**124**: 193-196.
20. Hubeau C, Apostolou I, Kobzik L. Adoptively transferred allergen-specific T cells cause maternal transmission of asthma risk. *Am J Pathol* 2006;**168**: 1931-1939.
21. Hubeau C, Apostolou I, Kobzik L. Targeting of CD25 and glucocorticoid-induced TNF receptor family-related gene-expressing T cells differentially modulates asthma risk in offspring of asthmatic and normal mother mice. *J Immunol* 2007;**178**: 1477-1487.
22. Lebold KM, Drake MG, Pincus AB, Pierce AB, Fryer AD, Jacoby DB. Unique allergic asthma phenotypes in offspring of house dust mite exposed mice. *Am J Respir Cell Mol Biol* 2022;**67**: 89-98.
23. Leme AS, Hubeau C, Xiang YH, *et al.* Role of breast milk in a mouse model of maternal transmission of asthma susceptibility. *J Immunol* 2006;**176**: 762-769.
24. Lenz KM, Pickett LA, Wright CL, Galan A, McCarthy MM. Prenatal allergen exposure perturbs sexual differentiation and programs lifelong changes in adult social and sexual behavior. *Sci Rep* 2019;**9**: 4837.
25. Lopez-Exposito I, Srivastava KD, Birmingham N, Castillo A, Miller RL, Li XM. Maternal Antiasthma Simplified Herbal Medicine Intervention therapy prevents airway inflammation and modulates pulmonary innate immune responses in young offspring mice. *Ann Allergy Asthma Immunol* 2015;**114**: 43-51.e41.
26. Matson AP, Zhu L, Lingenheld EG, *et al.* Maternal transmission of resistance to development of allergic airway disease. *J Immunol* 2007;**179**: 1282-1291.
27. Matson AP, Thrall RS, Rafti E, Puddington L. Breastmilk from allergic mothers can protect offspring from allergic airway inflammation. *Breastfeed Med* 2009;**4**: 167-174.
28. Matson AP, Thrall RS, Rafti E, Lingenheld EG, Puddington L. IgG transmitted from allergic mothers decreases allergic sensitization in breastfed offspring. *Clin Mol Allergy* 2010;**8**: 9.
29. Meakin AS, Morrison JL, Bradshaw EL, *et al.* Identification of placental androgen receptor isoforms in a sheep model of maternal allergic asthma. *Placenta* 2021;**104**: 232-235.
30. Nakata K, Kobayashi K, Ishikawa Y, *et al.* The transfer of maternal antigen-specific IgG regulates the development of allergic airway inflammation early in life in an FcRn-dependent manner. *Biochem Biophys Res Commun* 2010;**395**: 238-243.
31. Pucheu-Haston CM, Copeland LB, Haykal-Coates N, Ward MDW. The effects of pregnancy on the exacerbation and development of maternal allergic respiratory disease. *J Immunotoxicol* 2009;**6**.
32. Pucheu-Haston CM, Copeland LB, Haykal-Coates N, Ward MDW. Maternal respiratory sensitization and gestational allergen exposure does not affect subsequent pup responses to homologous or heterologous allergen. *J Immunotoxicol* 2010;**7**: 57-67.
33. Pulczynski JC, Shang Y, Dao T, *et al.* Multigenerational epigenetic regulation of allergic diseases: utilizing an experimental dust mite-induced asthma model. *Front Genet* 2021;**12**: 624561.

34. Schwartz JJ, Careaga M, Chang C, Onore CE, Ashwood P. Allergic fetal priming leads to developmental, behavioral and neurobiological changes in mice. *Transl Psychiatry* 2015;**5**: e543.
35. Schwartz JJ, Careaga M, Coburn MA, Rose DR, Hughes HK, Ashwood P. Behavioral impact of maternal allergic-asthma in two genetically distinct mouse strains. *Brain Behav Immun* 2017;**63**: 99-107.
36. Sodemann EB, Dähling S, Klopffleisch R, *et al.* Maternal asthma is associated with persistent changes in allergic offspring antibody glycosylation. *Clin Exp Allergy* 2020;**50**: 520-531.
37. Tamayo JM, Rose D, Church JS, Schwartz JJ, Ashwood P. Maternal allergic asthma induces prenatal neuroinflammation. *Brain Sci* 2022;**12**: 1041.
38. Vogel Ciernia A, Careaga M, LaSalle JM, Ashwood P. Microglia from offspring of dams with allergic asthma exhibit epigenomic alterations in genes dysregulated in autism. *Glia* 2018;**66**: 505-521.
39. Wooldridge AL, Clifton VL, Moss TJM, *et al.* Maternal allergic asthma during pregnancy alters fetal lung and immune development in sheep: potential mechanisms for programming asthma and allergy. *J Physiol* 2019;**597**: 4251-4262.
40. Wu XM, Hu CP, Li XZ, *et al.* Asthma pregnancy alters postnatal development of chromaffin cells in the rat adrenal medulla. *PLoS ONE* 2011;**6**: e20337.
